# Supplementary material for: Population-Based Evidence of Climate Change Adaptation in an Endangered Plant Endemic to a Biodiversity Hotspot
Source: MDPI journal article supplement (doi:10.3390/plants12102017), 2023-05-18
Supplement: s1 [file s1]

*Supplementary materials*

# Population-based Evidence of Climate Change Adaptation in an Endangered Plant Endemic to a Biodiversity Hotspot

Diego Alarcón <sup>1,2\*</sup>, David Santos <sup>3</sup> and Mary T. K. Arroyo <sup>1,2,4</sup>

<sup>1</sup> Departamento de Ciencias Ecológicas, Universidad de Chile, Santiago, Chile

<sup>2</sup> Instituto de Ecología y Biodiversidad (IEB), Chile

<sup>3</sup> Vivero Encanto Salvaje, Linares, Chile

<sup>4</sup> Cape Horn International Center (CHIC), Chile

\* Correspondence: chilebosque@gmail.com

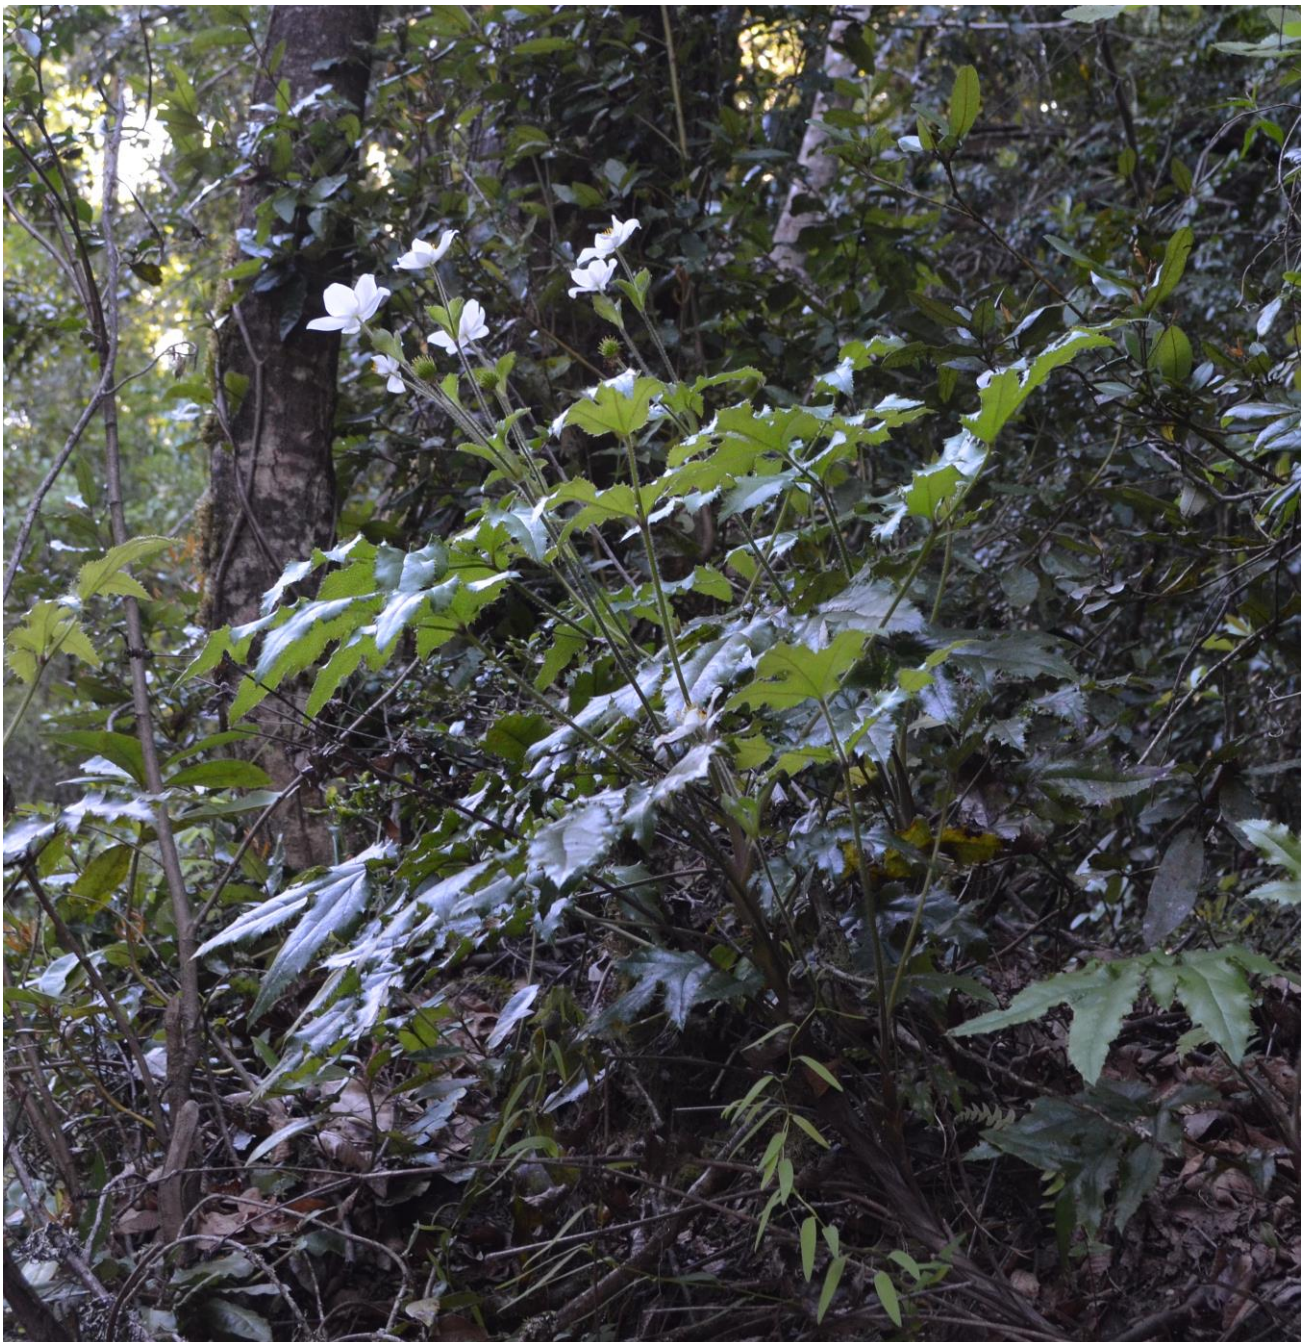

Figure S1: Image of an adult plant of *Anemone moorei* growing in its natural understory habitat.



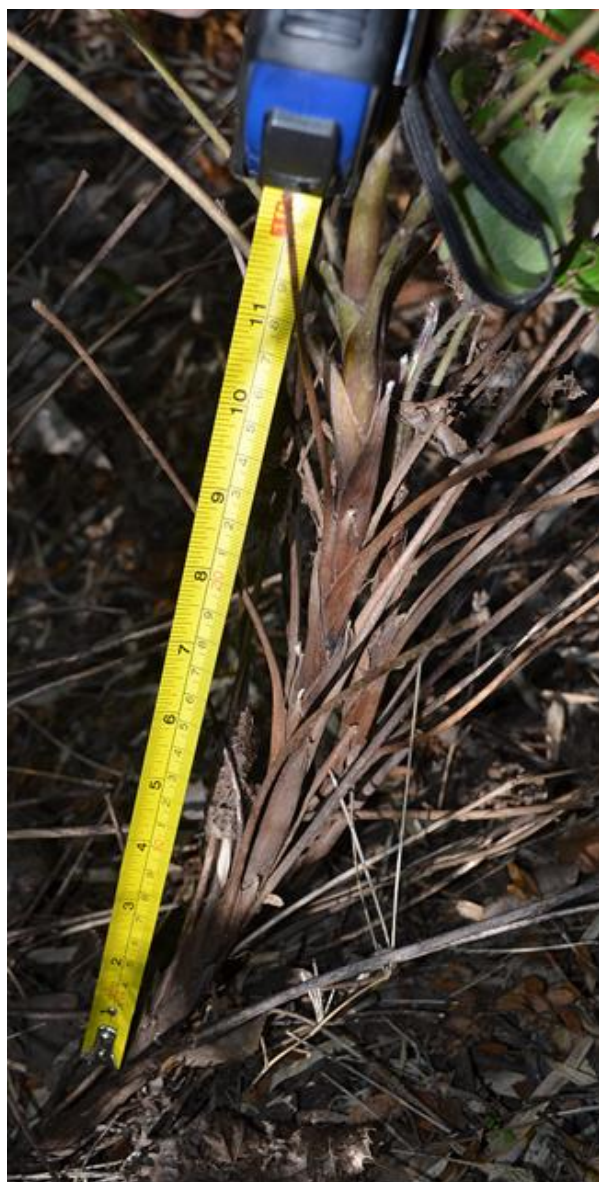

Figure S2: Growth pattern of the leaves on the stem of *A. moorei*.

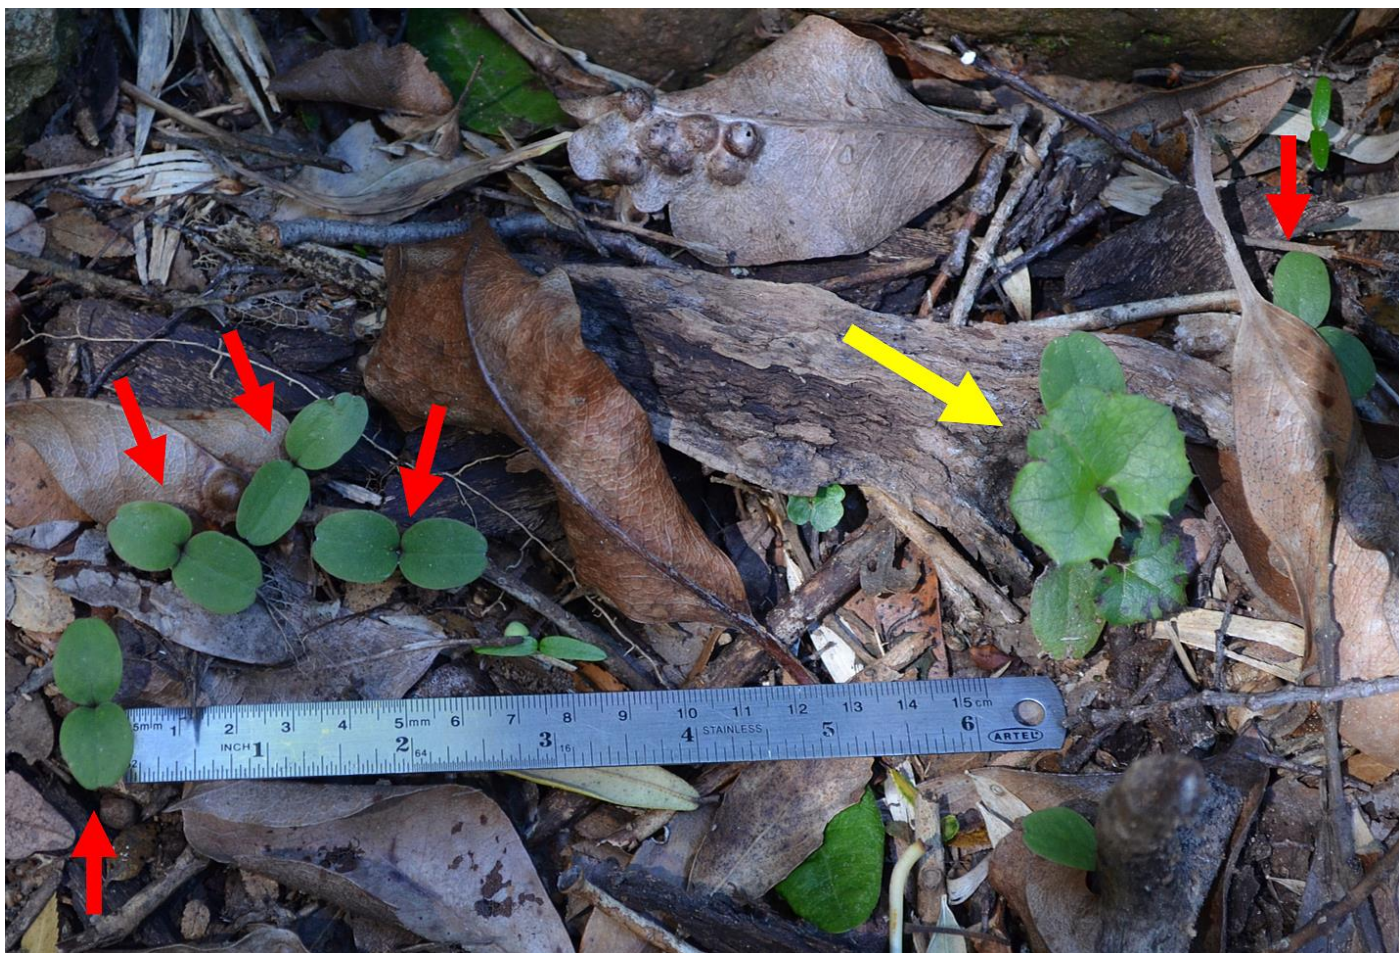

Figure S3: *A. moorei* seedlings from the Loma Larga Este population. Red arrows indicate pairs of green cotyledon leaves. Yellow arrow indicates the first true leaf with its distinct spiny margin.



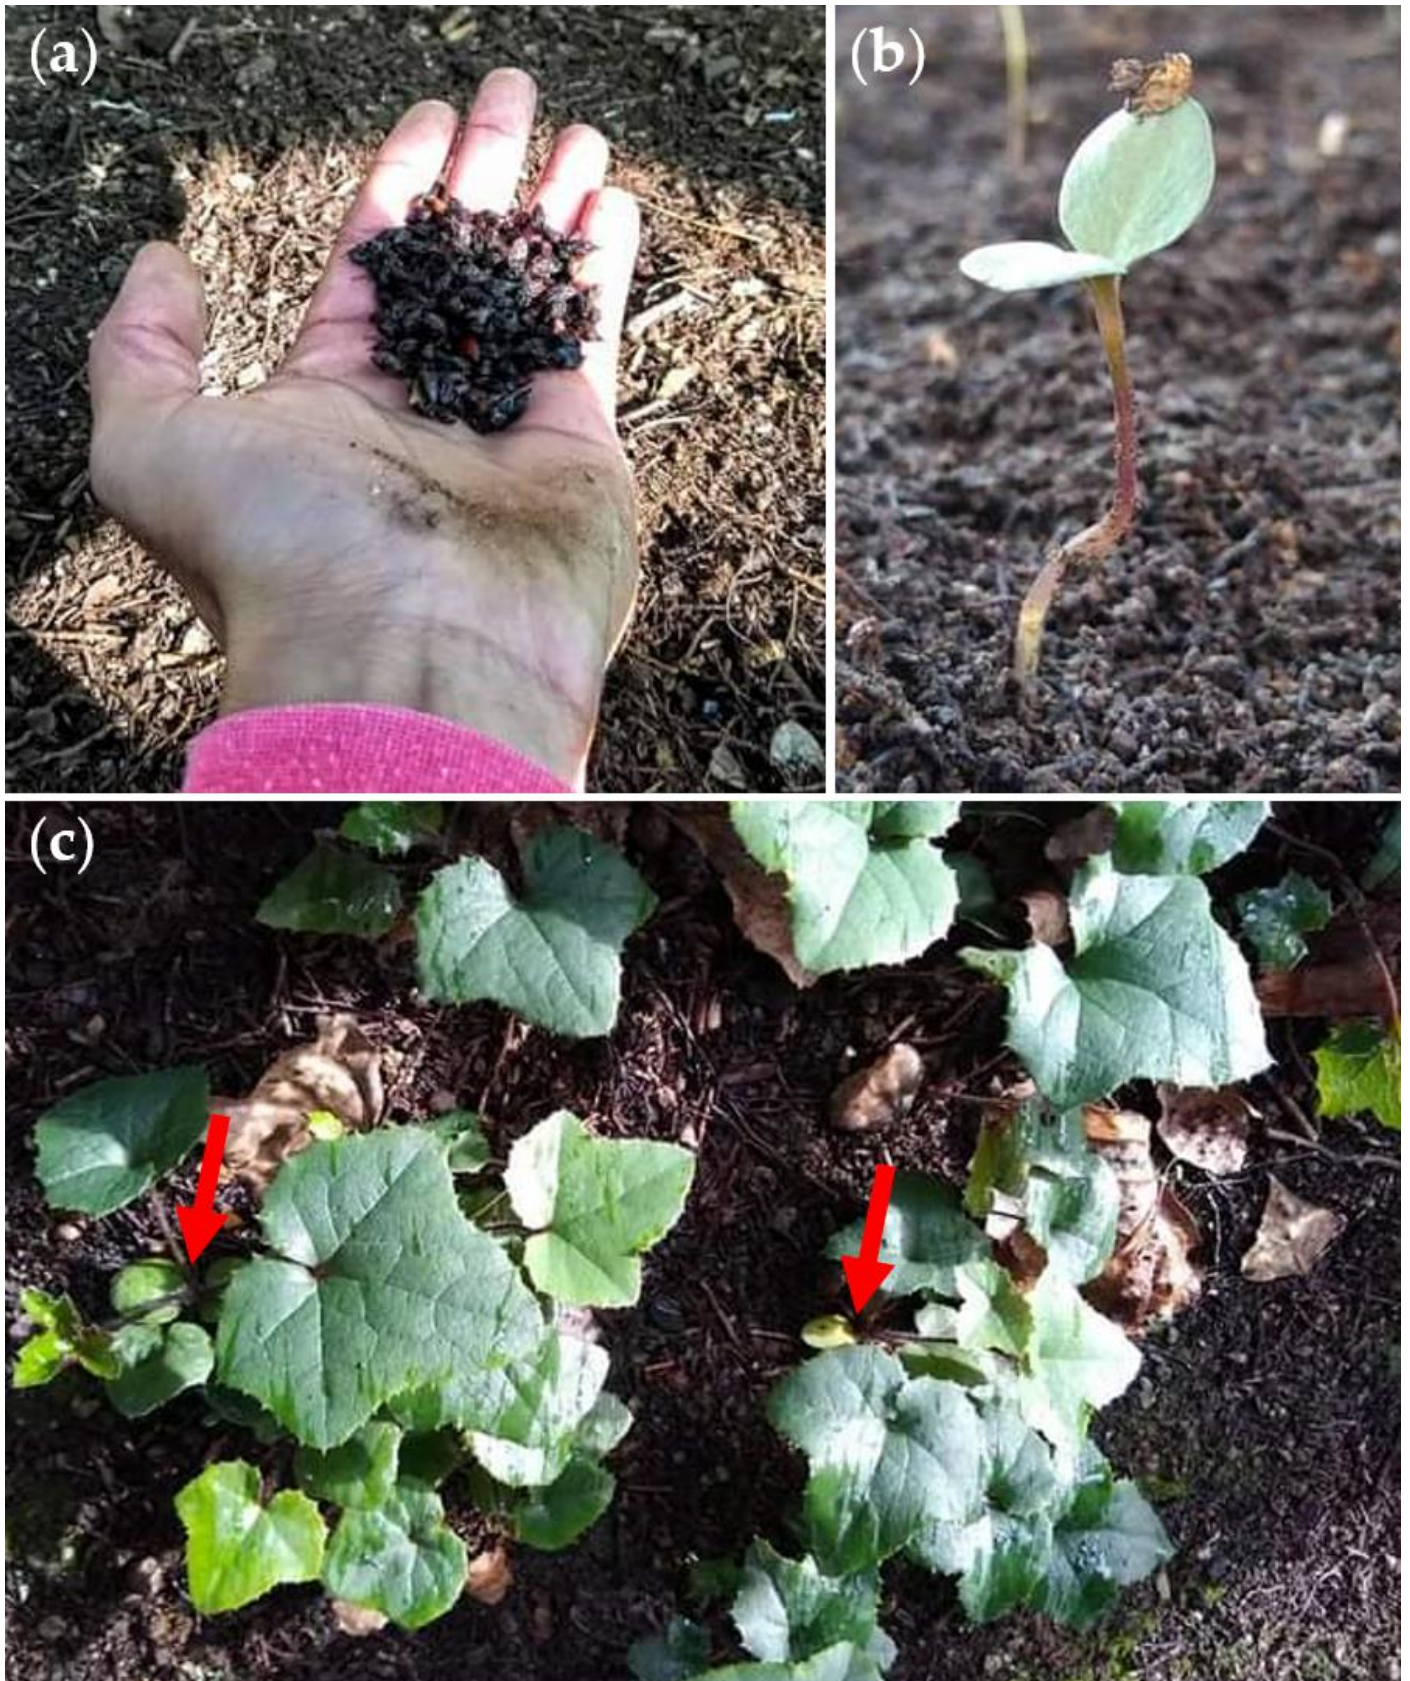

Figure S4: Germination of *A. moorei* in nursery. a) Seeds prior to sowing. b) A seedling with its cotyledons. c) Seedlings with their first true leaves with spiny margins, the red arrows indicate remaining cotyledons.



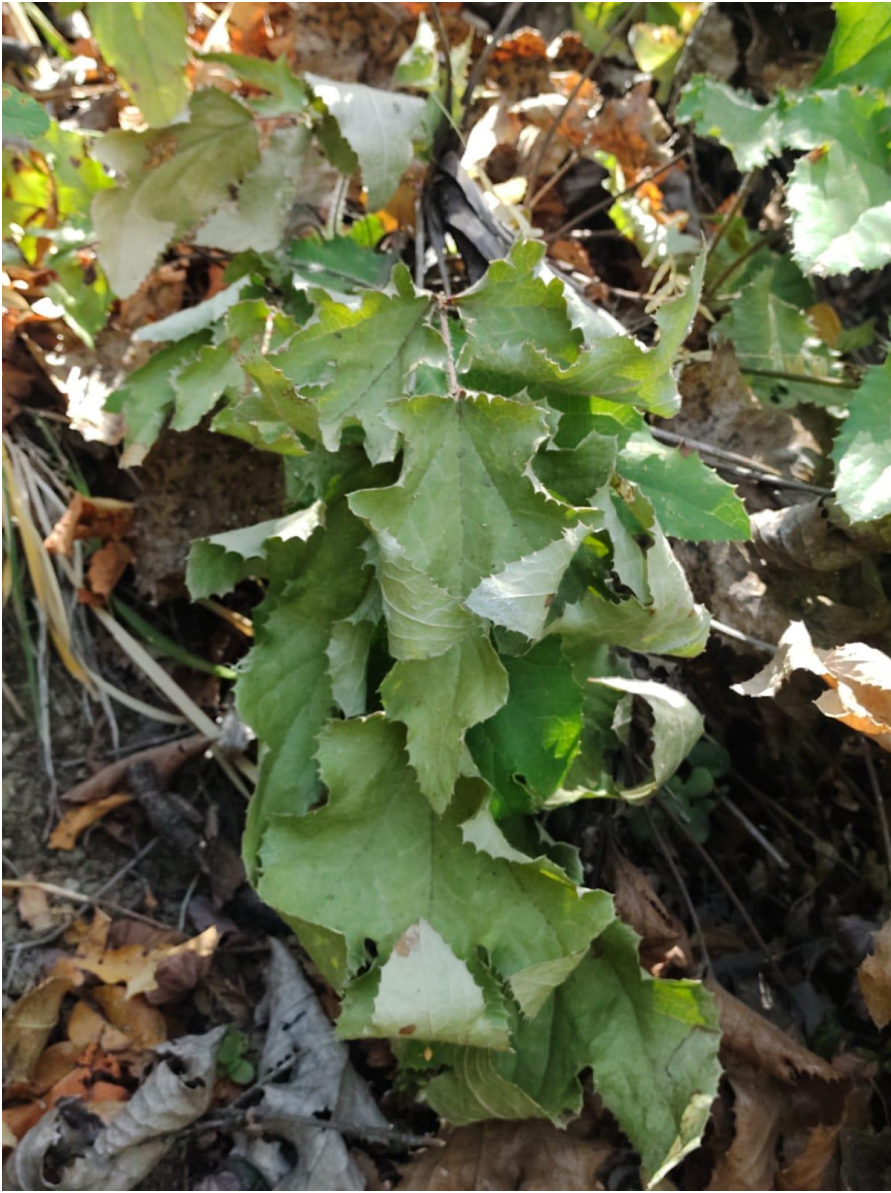

Figure S5: *A. moorei* plants that suddenly died in Rabones Oeste population.
