# Supplementary material for: Population-Based Evidence of Climate Change Adaptation in an Endangered Plant Endemic to a Biodiversity Hotspot
Source: Plants (Basel). 2023 May 18;12(10):2017. doi: 10.3390/plants12102017 (PMC10222059; doi:10.3390/plants12102017)
Supplement: Supplementary file 1 [file plants-12-02017-s001.zip › Alarcon_et_al_Plants202304_Supplementary_Materials_Tables.xlsx]

## Sheet: Supplementary materials
Supplementary materials
Population-based Evidence of Climate Change Adaptation in an Endangered Plant Endemic to a Biodiversity Hotspot
Diego Alarcón 1,2*, David Santos 3 and Mary T. K. Arroyo 1,2,4
1 Departamento de Ciencias Ecológicas, Universidad de Chile, Santiago, Chile
2 Instituto de Ecología y Biodiversidad (IEB), Chile
3 Vivero Encanto Salvaje, Linares, Chile
4 Cape Horn International Center (CHIC), Chile
Correspondence: chilebosque@gmail.com
Table S1: Sampling of leaves per stem per year and number of leaves per 30 cm stem segment per population.
Table S2: List of environmental variables selected to model the distribution of A. moorei according to Karger et al. [1]*.
Table S3: Census of stems lengths showing maturity stage in populations of A. moorei, and CCVI values.
Table S4: Statistical data from models of relationships between population parameters and the index of climate change vulnerability applied to the present scenario in A moorei.
* [1] Karger, D.N.; Conrad, O.; Böhner, J.; Kawohl, T.; Kreft, H.; Soria-Auza, R.W.; Zimmermann, N.E.; Linder, H.P.; Kessler, M. Climatologies at high resolution for the earth’s land surface areas. Scientific data 2017, 4, 1-20.

## Sheet: Table_S1
Table S1: Sampling of leaves per stem per year and number of leaves per 30 cm stem segment per population.
Stem length of the plant (cm)	Number of leaves per 30 cm of stem (n)	Number of new leaves per season (n)	Population
50	15	2	Los Patos
120	18	3	Los Patos
90	19	3	Los Patos
150	19	3	Los Patos
80	16	3	Los Patos
70	21	3	Los Patos
70	18	3	Los Patos
70	16	3	Los Patos
90	20	3	Los Patos
70	19	3	Los Patos
60	19	3	Los Patos
70	23	3	Los Patos
70	19	3	Los Patos
70	18	3	Los Patos
60	17	3	Los Patos
90	19	3	Los Patos
70	17	3	Los Patos
120	21	3	Los Patos
60	15	3	Los Patos
150	17	3	Los Patos
140	18	4	Los Patos
50	19	4	Los Patos
100	20	4	Los Patos
70	23	3	Los Patos
100	19	4	Los Patos
60	19	3	El Morrillo
90	18	3	El Morrillo
40	22	3	El Morrillo
40	19	3	El Morrillo
60	19	3	El Morrillo
80	18	3	El Morrillo
50	18	3	El Morrillo
70	19	2	El Morrillo
60	16	3	El Morrillo
50	15	4	El Morrillo
90	18	3	El Morrillo
100	19	3	El Morrillo
60	20	3	El Morrillo
70	17	3	El Morrillo
100	19	3	El Morrillo
90	19	3	El Morrillo
150	22	4	El Morrillo
80	18	3	El Morrillo
90	19	4	El Morrillo
60	20	3	El Morrillo
60	20	3	El Morrillo
60	16	3	El Morrillo
60	18	3	El Morrillo
130	15	3	El Morrillo
120	19	3	El Morrillo

## Sheet: Table_S2
Table S2: List of environmental variables selected to model the distribution of A. moorei according to Karger et al. [1]*.
Variable	Name	Unit	Scale	Explanation
Bio03	Isothermality	°C	0.1	Ratio of diurnal variation to annual variation in temperatures
Bio07	Annual range of air temperature	°C	0.1	The difference between the Maximum Temperature of Warmest month and the Minimum Temperature of Coldest month
Bio15	Precipitation seasonality	kg m-2	0.1	The Coefficient of Variation is the standard deviation of the monthly precipitation estimates expressed as a percentage of the mean of those estimates (i.e. the annual mean)
Bio19	Mean monthly precipitation amount of the coldest quarter	kg m-2 month-1	0.1	The coldest quarter of the year is determined (to the nearest month)
gdd10	Growing degree days heat sum above 10°C	°C	0.1	Heat sum of all days above the 10°C temperature accumulated over 1 year.
gsp	Accumulated precipitation amount on growing season days TREELIM	kg m-2 gsl-1	0.1	Precipitation sum accumulated on all days during the growing season based on TREELIM [2]*.
* [1] Karger, D.N.; Conrad, O.; Böhner, J.; Kawohl, T.; Kreft, H.; Soria-Auza, R.W.; Zimmermann, N.E.; Linder, H.P.; Kessler, M. Climatologies at high resolution for the earth’s land surface areas. Scientific data 2017, 4, 1-20.
* [2] Paulsen, J.; Körner, C. A climate-based model to predict potential treeline position around the globe. Alpine Botany 2014, 124, 1-12, doi:10.1007/s00035-014-0124-0.

## Sheet: Table_S3
Table S3: Census of stems lengths showing maturity stage in populations of A. moorei, and CCVI values.
	Stem length (cm)	Fruiting Plant	Population	CCVI 2055 GFDL-ESM4 126V21	CCVI 2055 IPSL-CM6A-LR 126V21	CCVI 2055 MPI-ESM1-2-HR 126V21	CCVI 2055 MRI-ESM2-0 126V21	CCVI 2055 UKESM1-0-LL 126V21	CCVI 2055 GFDL-ESM4 585V21	CCVI 2055 IPSL-CM6A-LR 585V21	CCVI 2055 MPI-ESM1-2-HR 585V21	CCVI 2055 MRI-ESM2-0 585V21	CCVI 2055 UKESM1-0-LL 585V21	Mean CCVI 2055	Mean CCVI 2055 126	Mean CCVI 2055 585	CCVI Current Scenario
1	190	1	Montecillo	1.06737	0.999961	1.00869	1.01163	1.03023	1.11089	1.15104	0.975789	1.04857	1.08741	1.04916	1.02357	1.07474	-1.34576
2	20	0	Montecillo	1.06737	0.999961	1.00869	1.01163	1.03023	1.11089	1.15104	0.975789	1.04857	1.08741	1.04916	1.02357	1.07474	-1.34576
3	30	0	Montecillo	1.06737	0.999961	1.00869	1.01163	1.03023	1.11089	1.15104	0.975789	1.04857	1.08741	1.04916	1.02357	1.07474	-1.34576
4	150	0	Montecillo	1.06737	0.999961	1.00869	1.01163	1.03023	1.11089	1.15104	0.975789	1.04857	1.08741	1.04916	1.02357	1.07474	-1.34576
5	180	0	Montecillo	1.06737	0.999961	1.00869	1.01163	1.03023	1.11089	1.15104	0.975789	1.04857	1.08741	1.04916	1.02357	1.07474	-1.34576
6	50	0	Montecillo	1.06737	0.999961	1.00869	1.01163	1.03023	1.11089	1.15104	0.975789	1.04857	1.08741	1.04916	1.02357	1.07474	-1.34576
7	70	0	Montecillo	1.06737	0.999961	1.00869	1.01163	1.03023	1.11089	1.15104	0.975789	1.04857	1.08741	1.04916	1.02357	1.07474	-1.34576
8	40	0	Montecillo	1.06737	0.999961	1.00869	1.01163	1.03023	1.11089	1.15104	0.975789	1.04857	1.08741	1.04916	1.02357	1.07474	-1.34576
9	30	0	Montecillo	1.06737	0.999961	1.00869	1.01163	1.03023	1.11089	1.15104	0.975789	1.04857	1.08741	1.04916	1.02357	1.07474	-1.34576
10	25	0	Montecillo	1.06737	0.999961	1.00869	1.01163	1.03023	1.11089	1.15104	0.975789	1.04857	1.08741	1.04916	1.02357	1.07474	-1.34576
11	20	0	Montecillo	1.06737	0.999961	1.00869	1.01163	1.03023	1.11089	1.15104	0.975789	1.04857	1.08741	1.04916	1.02357	1.07474	-1.34576
12	25	0	Montecillo	1.06737	0.999961	1.00869	1.01163	1.03023	1.11089	1.15104	0.975789	1.04857	1.08741	1.04916	1.02357	1.07474	-1.34576
13	15	0	Montecillo	1.06737	0.999961	1.00869	1.01163	1.03023	1.11089	1.15104	0.975789	1.04857	1.08741	1.04916	1.02357	1.07474	-1.34576
14	70	1	Montecillo	1.06737	0.999961	1.00869	1.01163	1.03023	1.11089	1.15104	0.975789	1.04857	1.08741	1.04916	1.02357	1.07474	-1.34576
15	60	0	Montecillo	1.06737	0.999961	1.00869	1.01163	1.03023	1.11089	1.15104	0.975789	1.04857	1.08741	1.04916	1.02357	1.07474	-1.34576
16	60	0	Montecillo	1.06737	0.999961	1.00869	1.01163	1.03023	1.11089	1.15104	0.975789	1.04857	1.08741	1.04916	1.02357	1.07474	-1.34576
17	60	0	Montecillo	1.06737	0.999961	1.00869	1.01163	1.03023	1.11089	1.15104	0.975789	1.04857	1.08741	1.04916	1.02357	1.07474	-1.34576
18	30	0	Montecillo	1.06737	0.999961	1.00869	1.01163	1.03023	1.11089	1.15104	0.975789	1.04857	1.08741	1.04916	1.02357	1.07474	-1.34576
19	200	1	Montecillo	1.06737	0.999961	1.00869	1.01163	1.03023	1.11089	1.15104	0.975789	1.04857	1.08741	1.04916	1.02357	1.07474	-1.34576
20	150	1	Montecillo	1.06737	0.999961	1.00869	1.01163	1.03023	1.11089	1.15104	0.975789	1.04857	1.08741	1.04916	1.02357	1.07474	-1.34576
21	45	0	Montecillo	1.06737	0.999961	1.00869	1.01163	1.03023	1.11089	1.15104	0.975789	1.04857	1.08741	1.04916	1.02357	1.07474	-1.34576
22	35	0	Montecillo	1.06737	0.999961	1.00869	1.01163	1.03023	1.11089	1.15104	0.975789	1.04857	1.08741	1.04916	1.02357	1.07474	-1.34576
23	65	1	Montecillo	1.06737	0.999961	1.00869	1.01163	1.03023	1.11089	1.15104	0.975789	1.04857	1.08741	1.04916	1.02357	1.07474	-1.34576
24	95	0	Montecillo	1.06737	0.999961	1.00869	1.01163	1.03023	1.11089	1.15104	0.975789	1.04857	1.08741	1.04916	1.02357	1.07474	-1.34576
25	80	0	Montecillo	1.06737	0.999961	1.00869	1.01163	1.03023	1.11089	1.15104	0.975789	1.04857	1.08741	1.04916	1.02357	1.07474	-1.34576
26	100	0	Montecillo	1.06737	0.999961	1.00869	1.01163	1.03023	1.11089	1.15104	0.975789	1.04857	1.08741	1.04916	1.02357	1.07474	-1.34576
27	25	0	Montecillo	1.06737	0.999961	1.00869	1.01163	1.03023	1.11089	1.15104	0.975789	1.04857	1.08741	1.04916	1.02357	1.07474	-1.34576
28	45	0	Montecillo	1.06737	0.999961	1.00869	1.01163	1.03023	1.11089	1.15104	0.975789	1.04857	1.08741	1.04916	1.02357	1.07474	-1.34576
29	35	0	Montecillo	1.06737	0.999961	1.00869	1.01163	1.03023	1.11089	1.15104	0.975789	1.04857	1.08741	1.04916	1.02357	1.07474	-1.34576
30	50	0	Montecillo	1.06737	0.999961	1.00869	1.01163	1.03023	1.11089	1.15104	0.975789	1.04857	1.08741	1.04916	1.02357	1.07474	-1.34576
31	35	0	Montecillo	1.06737	0.999961	1.00869	1.01163	1.03023	1.11089	1.15104	0.975789	1.04857	1.08741	1.04916	1.02357	1.07474	-1.34576
32	40	0	Montecillo	1.06737	0.999961	1.00869	1.01163	1.03023	1.11089	1.15104	0.975789	1.04857	1.08741	1.04916	1.02357	1.07474	-1.34576
33	20	0	Montecillo	1.06737	0.999961	1.00869	1.01163	1.03023	1.11089	1.15104	0.975789	1.04857	1.08741	1.04916	1.02357	1.07474	-1.34576
34	45	0	Montecillo	1.06737	0.999961	1.00869	1.01163	1.03023	1.11089	1.15104	0.975789	1.04857	1.08741	1.04916	1.02357	1.07474	-1.34576
35	45	0	Montecillo	1.06737	0.999961	1.00869	1.01163	1.03023	1.11089	1.15104	0.975789	1.04857	1.08741	1.04916	1.02357	1.07474	-1.34576
36	30	0	Montecillo	1.06737	0.999961	1.00869	1.01163	1.03023	1.11089	1.15104	0.975789	1.04857	1.08741	1.04916	1.02357	1.07474	-1.34576
37	115	1	Montecillo	1.06737	0.999961	1.00869	1.01163	1.03023	1.11089	1.15104	0.975789	1.04857	1.08741	1.04916	1.02357	1.07474	-1.34576
38	20	0	Montecillo	1.06737	0.999961	1.00869	1.01163	1.03023	1.11089	1.15104	0.975789	1.04857	1.08741	1.04916	1.02357	1.07474	-1.34576
39	45	0	Montecillo	1.06737	0.999961	1.00869	1.01163	1.03023	1.11089	1.15104	0.975789	1.04857	1.08741	1.04916	1.02357	1.07474	-1.34576
40	80	1	Montecillo	1.06737	0.999961	1.00869	1.01163	1.03023	1.11089	1.15104	0.975789	1.04857	1.08741	1.04916	1.02357	1.07474	-1.34576
41	120	1	Montecillo	1.06737	0.999961	1.00869	1.01163	1.03023	1.11089	1.15104	0.975789	1.04857	1.08741	1.04916	1.02357	1.07474	-1.34576
42	25	0	Montecillo	1.06737	0.999961	1.00869	1.01163	1.03023	1.11089	1.15104	0.975789	1.04857	1.08741	1.04916	1.02357	1.07474	-1.34576
43	40	0	Montecillo	1.06737	0.999961	1.00869	1.01163	1.03023	1.11089	1.15104	0.975789	1.04857	1.08741	1.04916	1.02357	1.07474	-1.34576
44	40	0	Montecillo	1.06737	0.999961	1.00869	1.01163	1.03023	1.11089	1.15104	0.975789	1.04857	1.08741	1.04916	1.02357	1.07474	-1.34576
45	35	0	Montecillo	1.06737	0.999961	1.00869	1.01163	1.03023	1.11089	1.15104	0.975789	1.04857	1.08741	1.04916	1.02357	1.07474	-1.34576
46	45	0	Montecillo	1.06737	0.999961	1.00869	1.01163	1.03023	1.11089	1.15104	0.975789	1.04857	1.08741	1.04916	1.02357	1.07474	-1.34576
47	40	0	Montecillo	1.06737	0.999961	1.00869	1.01163	1.03023	1.11089	1.15104	0.975789	1.04857	1.08741	1.04916	1.02357	1.07474	-1.34576
48	85	0	Montecillo	1.06737	0.999961	1.00869	1.01163	1.03023	1.11089	1.15104	0.975789	1.04857	1.08741	1.04916	1.02357	1.07474	-1.34576
49	45	0	Montecillo	1.06737	0.999961	1.00869	1.01163	1.03023	1.11089	1.15104	0.975789	1.04857	1.08741	1.04916	1.02357	1.07474	-1.34576
50	50	0	Montecillo	1.06737	0.999961	1.00869	1.01163	1.03023	1.11089	1.15104	0.975789	1.04857	1.08741	1.04916	1.02357	1.07474	-1.34576
51	45	0	Montecillo	1.06737	0.999961	1.00869	1.01163	1.03023	1.11089	1.15104	0.975789	1.04857	1.08741	1.04916	1.02357	1.07474	-1.34576
52	35	0	Montecillo	1.06737	0.999961	1.00869	1.01163	1.03023	1.11089	1.15104	0.975789	1.04857	1.08741	1.04916	1.02357	1.07474	-1.34576
53	35	0	Montecillo	1.06737	0.999961	1.00869	1.01163	1.03023	1.11089	1.15104	0.975789	1.04857	1.08741	1.04916	1.02357	1.07474	-1.34576
54	50	1	Montecillo	1.06737	0.999961	1.00869	1.01163	1.03023	1.11089	1.15104	0.975789	1.04857	1.08741	1.04916	1.02357	1.07474	-1.34576
55	70	1	Montecillo	1.06737	0.999961	1.00869	1.01163	1.03023	1.11089	1.15104	0.975789	1.04857	1.08741	1.04916	1.02357	1.07474	-1.34576
56	25	0	Montecillo	1.06737	0.999961	1.00869	1.01163	1.03023	1.11089	1.15104	0.975789	1.04857	1.08741	1.04916	1.02357	1.07474	-1.34576
57	30	0	Montecillo	1.06737	0.999961	1.00869	1.01163	1.03023	1.11089	1.15104	0.975789	1.04857	1.08741	1.04916	1.02357	1.07474	-1.34576
58	60	0	Montecillo	1.06737	0.999961	1.00869	1.01163	1.03023	1.11089	1.15104	0.975789	1.04857	1.08741	1.04916	1.02357	1.07474	-1.34576
59	40	0	Montecillo	1.06737	0.999961	1.00869	1.01163	1.03023	1.11089	1.15104	0.975789	1.04857	1.08741	1.04916	1.02357	1.07474	-1.34576
60	40	0	Montecillo	1.06737	0.999961	1.00869	1.01163	1.03023	1.11089	1.15104	0.975789	1.04857	1.08741	1.04916	1.02357	1.07474	-1.34576
61	30	0	Montecillo	1.06737	0.999961	1.00869	1.01163	1.03023	1.11089	1.15104	0.975789	1.04857	1.08741	1.04916	1.02357	1.07474	-1.34576
62	30	0	Montecillo	1.06737	0.999961	1.00869	1.01163	1.03023	1.11089	1.15104	0.975789	1.04857	1.08741	1.04916	1.02357	1.07474	-1.34576
63	20	0	Montecillo	1.06737	0.999961	1.00869	1.01163	1.03023	1.11089	1.15104	0.975789	1.04857	1.08741	1.04916	1.02357	1.07474	-1.34576
64	40	0	Montecillo	1.06737	0.999961	1.00869	1.01163	1.03023	1.11089	1.15104	0.975789	1.04857	1.08741	1.04916	1.02357	1.07474	-1.34576
65	30	0	Montecillo	1.06737	0.999961	1.00869	1.01163	1.03023	1.11089	1.15104	0.975789	1.04857	1.08741	1.04916	1.02357	1.07474	-1.34576
66	30	0	Montecillo	1.06737	0.999961	1.00869	1.01163	1.03023	1.11089	1.15104	0.975789	1.04857	1.08741	1.04916	1.02357	1.07474	-1.34576
67	40	0	Montecillo	1.06737	0.999961	1.00869	1.01163	1.03023	1.11089	1.15104	0.975789	1.04857	1.08741	1.04916	1.02357	1.07474	-1.34576
68	40	0	Montecillo	1.06737	0.999961	1.00869	1.01163	1.03023	1.11089	1.15104	0.975789	1.04857	1.08741	1.04916	1.02357	1.07474	-1.34576
69	50	0	Montecillo	1.06737	0.999961	1.00869	1.01163	1.03023	1.11089	1.15104	0.975789	1.04857	1.08741	1.04916	1.02357	1.07474	-1.34576
70	60	0	Montecillo	1.06737	0.999961	1.00869	1.01163	1.03023	1.11089	1.15104	0.975789	1.04857	1.08741	1.04916	1.02357	1.07474	-1.34576
71	70	0	Montecillo	1.06737	0.999961	1.00869	1.01163	1.03023	1.11089	1.15104	0.975789	1.04857	1.08741	1.04916	1.02357	1.07474	-1.34576
72	30	0	Montecillo	1.06737	0.999961	1.00869	1.01163	1.03023	1.11089	1.15104	0.975789	1.04857	1.08741	1.04916	1.02357	1.07474	-1.34576
73	60	0	Montecillo	1.06737	0.999961	1.00869	1.01163	1.03023	1.11089	1.15104	0.975789	1.04857	1.08741	1.04916	1.02357	1.07474	-1.34576
74	45	0	Montecillo	1.06737	0.999961	1.00869	1.01163	1.03023	1.11089	1.15104	0.975789	1.04857	1.08741	1.04916	1.02357	1.07474	-1.34576
75	30	0	Montecillo	1.06737	0.999961	1.00869	1.01163	1.03023	1.11089	1.15104	0.975789	1.04857	1.08741	1.04916	1.02357	1.07474	-1.34576
76	30	0	Montecillo	1.06737	0.999961	1.00869	1.01163	1.03023	1.11089	1.15104	0.975789	1.04857	1.08741	1.04916	1.02357	1.07474	-1.34576
77	20	0	Montecillo	1.06737	0.999961	1.00869	1.01163	1.03023	1.11089	1.15104	0.975789	1.04857	1.08741	1.04916	1.02357	1.07474	-1.34576
78	95	1	Montecillo	1.06737	0.999961	1.00869	1.01163	1.03023	1.11089	1.15104	0.975789	1.04857	1.08741	1.04916	1.02357	1.07474	-1.34576
79	20	0	Montecillo	1.06737	0.999961	1.00869	1.01163	1.03023	1.11089	1.15104	0.975789	1.04857	1.08741	1.04916	1.02357	1.07474	-1.34576
80	8	0	Montecillo	1.06737	0.999961	1.00869	1.01163	1.03023	1.11089	1.15104	0.975789	1.04857	1.08741	1.04916	1.02357	1.07474	-1.34576
81	90	1	Montecillo	1.06737	0.999961	1.00869	1.01163	1.03023	1.11089	1.15104	0.975789	1.04857	1.08741	1.04916	1.02357	1.07474	-1.34576
82	140	1	Montecillo	1.06737	0.999961	1.00869	1.01163	1.03023	1.11089	1.15104	0.975789	1.04857	1.08741	1.04916	1.02357	1.07474	-1.34576
83	90	1	Montecillo	1.06737	0.999961	1.00869	1.01163	1.03023	1.11089	1.15104	0.975789	1.04857	1.08741	1.04916	1.02357	1.07474	-1.34576
84	10	0	Montecillo	1.06737	0.999961	1.00869	1.01163	1.03023	1.11089	1.15104	0.975789	1.04857	1.08741	1.04916	1.02357	1.07474	-1.34576
85	35	0	Montecillo	1.06737	0.999961	1.00869	1.01163	1.03023	1.11089	1.15104	0.975789	1.04857	1.08741	1.04916	1.02357	1.07474	-1.34576
86	70	0	Montecillo	1.06737	0.999961	1.00869	1.01163	1.03023	1.11089	1.15104	0.975789	1.04857	1.08741	1.04916	1.02357	1.07474	-1.34576
87	40	0	Montecillo	1.06737	0.999961	1.00869	1.01163	1.03023	1.11089	1.15104	0.975789	1.04857	1.08741	1.04916	1.02357	1.07474	-1.34576
88	35	0	Montecillo	1.06737	0.999961	1.00869	1.01163	1.03023	1.11089	1.15104	0.975789	1.04857	1.08741	1.04916	1.02357	1.07474	-1.34576
89	30	0	Montecillo	1.06737	0.999961	1.00869	1.01163	1.03023	1.11089	1.15104	0.975789	1.04857	1.08741	1.04916	1.02357	1.07474	-1.34576
90	30	0	Montecillo	1.06737	0.999961	1.00869	1.01163	1.03023	1.11089	1.15104	0.975789	1.04857	1.08741	1.04916	1.02357	1.07474	-1.34576
91	30	0	Montecillo	1.06737	0.999961	1.00869	1.01163	1.03023	1.11089	1.15104	0.975789	1.04857	1.08741	1.04916	1.02357	1.07474	-1.34576
92	50	0	Montecillo	1.06737	0.999961	1.00869	1.01163	1.03023	1.11089	1.15104	0.975789	1.04857	1.08741	1.04916	1.02357	1.07474	-1.34576
93	40	0	Montecillo	1.06737	0.999961	1.00869	1.01163	1.03023	1.11089	1.15104	0.975789	1.04857	1.08741	1.04916	1.02357	1.07474	-1.34576
94	40	0	Montecillo	1.06737	0.999961	1.00869	1.01163	1.03023	1.11089	1.15104	0.975789	1.04857	1.08741	1.04916	1.02357	1.07474	-1.34576
95	30	0	Montecillo	1.06737	0.999961	1.00869	1.01163	1.03023	1.11089	1.15104	0.975789	1.04857	1.08741	1.04916	1.02357	1.07474	-1.34576
96	70	0	Montecillo	1.06737	0.999961	1.00869	1.01163	1.03023	1.11089	1.15104	0.975789	1.04857	1.08741	1.04916	1.02357	1.07474	-1.34576
97	60	0	Montecillo	1.06737	0.999961	1.00869	1.01163	1.03023	1.11089	1.15104	0.975789	1.04857	1.08741	1.04916	1.02357	1.07474	-1.34576
98	45	0	Montecillo	1.06737	0.999961	1.00869	1.01163	1.03023	1.11089	1.15104	0.975789	1.04857	1.08741	1.04916	1.02357	1.07474	-1.34576
99	35	0	Montecillo	1.06737	0.999961	1.00869	1.01163	1.03023	1.11089	1.15104	0.975789	1.04857	1.08741	1.04916	1.02357	1.07474	-1.34576
100	40	0	Montecillo	1.06737	0.999961	1.00869	1.01163	1.03023	1.11089	1.15104	0.975789	1.04857	1.08741	1.04916	1.02357	1.07474	-1.34576
101	35	0	Montecillo	1.06737	0.999961	1.00869	1.01163	1.03023	1.11089	1.15104	0.975789	1.04857	1.08741	1.04916	1.02357	1.07474	-1.34576
102	50	1	Montecillo	1.06737	0.999961	1.00869	1.01163	1.03023	1.11089	1.15104	0.975789	1.04857	1.08741	1.04916	1.02357	1.07474	-1.34576
103	40	0	Montecillo	1.06737	0.999961	1.00869	1.01163	1.03023	1.11089	1.15104	0.975789	1.04857	1.08741	1.04916	1.02357	1.07474	-1.34576
104	55	0	Montecillo	1.06737	0.999961	1.00869	1.01163	1.03023	1.11089	1.15104	0.975789	1.04857	1.08741	1.04916	1.02357	1.07474	-1.34576
105	30	0	Montecillo	1.06737	0.999961	1.00869	1.01163	1.03023	1.11089	1.15104	0.975789	1.04857	1.08741	1.04916	1.02357	1.07474	-1.34576
106	30	0	Montecillo	1.06737	0.999961	1.00869	1.01163	1.03023	1.11089	1.15104	0.975789	1.04857	1.08741	1.04916	1.02357	1.07474	-1.34576
107	40	1	Montecillo	1.06737	0.999961	1.00869	1.01163	1.03023	1.11089	1.15104	0.975789	1.04857	1.08741	1.04916	1.02357	1.07474	-1.34576
108	100	1	Montecillo	1.06737	0.999961	1.00869	1.01163	1.03023	1.11089	1.15104	0.975789	1.04857	1.08741	1.04916	1.02357	1.07474	-1.34576
109	40	0	Montecillo	1.06737	0.999961	1.00869	1.01163	1.03023	1.11089	1.15104	0.975789	1.04857	1.08741	1.04916	1.02357	1.07474	-1.34576
110	40	1	Montecillo	1.06737	0.999961	1.00869	1.01163	1.03023	1.11089	1.15104	0.975789	1.04857	1.08741	1.04916	1.02357	1.07474	-1.34576
111	40	0	Montecillo	1.06737	0.999961	1.00869	1.01163	1.03023	1.11089	1.15104	0.975789	1.04857	1.08741	1.04916	1.02357	1.07474	-1.34576
112	60	0	Montecillo	1.06737	0.999961	1.00869	1.01163	1.03023	1.11089	1.15104	0.975789	1.04857	1.08741	1.04916	1.02357	1.07474	-1.34576
113	30	0	Montecillo	1.06737	0.999961	1.00869	1.01163	1.03023	1.11089	1.15104	0.975789	1.04857	1.08741	1.04916	1.02357	1.07474	-1.34576
114	30	0	Montecillo	1.06737	0.999961	1.00869	1.01163	1.03023	1.11089	1.15104	0.975789	1.04857	1.08741	1.04916	1.02357	1.07474	-1.34576
115	30	0	Montecillo	1.06737	0.999961	1.00869	1.01163	1.03023	1.11089	1.15104	0.975789	1.04857	1.08741	1.04916	1.02357	1.07474	-1.34576
116	25	0	Montecillo	1.06737	0.999961	1.00869	1.01163	1.03023	1.11089	1.15104	0.975789	1.04857	1.08741	1.04916	1.02357	1.07474	-1.34576
117	30	0	Montecillo	1.06737	0.999961	1.00869	1.01163	1.03023	1.11089	1.15104	0.975789	1.04857	1.08741	1.04916	1.02357	1.07474	-1.34576
118	30	0	Montecillo	1.06737	0.999961	1.00869	1.01163	1.03023	1.11089	1.15104	0.975789	1.04857	1.08741	1.04916	1.02357	1.07474	-1.34576
119	30	0	Montecillo	1.06737	0.999961	1.00869	1.01163	1.03023	1.11089	1.15104	0.975789	1.04857	1.08741	1.04916	1.02357	1.07474	-1.34576
120	30	0	Montecillo	1.06737	0.999961	1.00869	1.01163	1.03023	1.11089	1.15104	0.975789	1.04857	1.08741	1.04916	1.02357	1.07474	-1.34576
121	50	0	Montecillo	1.06737	0.999961	1.00869	1.01163	1.03023	1.11089	1.15104	0.975789	1.04857	1.08741	1.04916	1.02357	1.07474	-1.34576
122	40	0	Montecillo	1.06737	0.999961	1.00869	1.01163	1.03023	1.11089	1.15104	0.975789	1.04857	1.08741	1.04916	1.02357	1.07474	-1.34576
123	50	0	Montecillo	1.06737	0.999961	1.00869	1.01163	1.03023	1.11089	1.15104	0.975789	1.04857	1.08741	1.04916	1.02357	1.07474	-1.34576
124	40	1	Montecillo	1.06737	0.999961	1.00869	1.01163	1.03023	1.11089	1.15104	0.975789	1.04857	1.08741	1.04916	1.02357	1.07474	-1.34576
125	30	0	Montecillo	1.06737	0.999961	1.00869	1.01163	1.03023	1.11089	1.15104	0.975789	1.04857	1.08741	1.04916	1.02357	1.07474	-1.34576
126	40	0	Montecillo	1.06737	0.999961	1.00869	1.01163	1.03023	1.11089	1.15104	0.975789	1.04857	1.08741	1.04916	1.02357	1.07474	-1.34576
127	50	1	Montecillo	1.06737	0.999961	1.00869	1.01163	1.03023	1.11089	1.15104	0.975789	1.04857	1.08741	1.04916	1.02357	1.07474	-1.34576
128	40	0	Montecillo	1.06737	0.999961	1.00869	1.01163	1.03023	1.11089	1.15104	0.975789	1.04857	1.08741	1.04916	1.02357	1.07474	-1.34576
129	30	0	Montecillo	1.06737	0.999961	1.00869	1.01163	1.03023	1.11089	1.15104	0.975789	1.04857	1.08741	1.04916	1.02357	1.07474	-1.34576
130	30	0	Montecillo	1.06737	0.999961	1.00869	1.01163	1.03023	1.11089	1.15104	0.975789	1.04857	1.08741	1.04916	1.02357	1.07474	-1.34576
131	50	0	Montecillo	1.06737	0.999961	1.00869	1.01163	1.03023	1.11089	1.15104	0.975789	1.04857	1.08741	1.04916	1.02357	1.07474	-1.34576
132	30	0	Montecillo	1.06737	0.999961	1.00869	1.01163	1.03023	1.11089	1.15104	0.975789	1.04857	1.08741	1.04916	1.02357	1.07474	-1.34576
133	70	0	Montecillo	1.06737	0.999961	1.00869	1.01163	1.03023	1.11089	1.15104	0.975789	1.04857	1.08741	1.04916	1.02357	1.07474	-1.34576
134	70	0	Montecillo	1.06737	0.999961	1.00869	1.01163	1.03023	1.11089	1.15104	0.975789	1.04857	1.08741	1.04916	1.02357	1.07474	-1.34576
135	70	0	Montecillo	1.06737	0.999961	1.00869	1.01163	1.03023	1.11089	1.15104	0.975789	1.04857	1.08741	1.04916	1.02357	1.07474	-1.34576
136	30	0	Montecillo	1.06737	0.999961	1.00869	1.01163	1.03023	1.11089	1.15104	0.975789	1.04857	1.08741	1.04916	1.02357	1.07474	-1.34576
137	40	0	Montecillo	1.06737	0.999961	1.00869	1.01163	1.03023	1.11089	1.15104	0.975789	1.04857	1.08741	1.04916	1.02357	1.07474	-1.34576
138	40	0	Montecillo	1.06737	0.999961	1.00869	1.01163	1.03023	1.11089	1.15104	0.975789	1.04857	1.08741	1.04916	1.02357	1.07474	-1.34576
139	50	0	Montecillo	1.06737	0.999961	1.00869	1.01163	1.03023	1.11089	1.15104	0.975789	1.04857	1.08741	1.04916	1.02357	1.07474	-1.34576
140	80	0	Montecillo	1.06737	0.999961	1.00869	1.01163	1.03023	1.11089	1.15104	0.975789	1.04857	1.08741	1.04916	1.02357	1.07474	-1.34576
141	50	0	Montecillo	1.06737	0.999961	1.00869	1.01163	1.03023	1.11089	1.15104	0.975789	1.04857	1.08741	1.04916	1.02357	1.07474	-1.34576
142	60	0	Montecillo	1.06737	0.999961	1.00869	1.01163	1.03023	1.11089	1.15104	0.975789	1.04857	1.08741	1.04916	1.02357	1.07474	-1.34576
143	40	0	Montecillo	1.06737	0.999961	1.00869	1.01163	1.03023	1.11089	1.15104	0.975789	1.04857	1.08741	1.04916	1.02357	1.07474	-1.34576
144	50	0	Montecillo	1.06737	0.999961	1.00869	1.01163	1.03023	1.11089	1.15104	0.975789	1.04857	1.08741	1.04916	1.02357	1.07474	-1.34576
145	30	0	Montecillo	1.06737	0.999961	1.00869	1.01163	1.03023	1.11089	1.15104	0.975789	1.04857	1.08741	1.04916	1.02357	1.07474	-1.34576
146	80	1	Montecillo	1.06737	0.999961	1.00869	1.01163	1.03023	1.11089	1.15104	0.975789	1.04857	1.08741	1.04916	1.02357	1.07474	-1.34576
147	50	0	Montecillo	1.06737	0.999961	1.00869	1.01163	1.03023	1.11089	1.15104	0.975789	1.04857	1.08741	1.04916	1.02357	1.07474	-1.34576
148	40	0	Montecillo	1.06737	0.999961	1.00869	1.01163	1.03023	1.11089	1.15104	0.975789	1.04857	1.08741	1.04916	1.02357	1.07474	-1.34576
149	40	0	Montecillo	1.06737	0.999961	1.00869	1.01163	1.03023	1.11089	1.15104	0.975789	1.04857	1.08741	1.04916	1.02357	1.07474	-1.34576
150	30	0	Montecillo	1.06737	0.999961	1.00869	1.01163	1.03023	1.11089	1.15104	0.975789	1.04857	1.08741	1.04916	1.02357	1.07474	-1.34576
151	40	0	Montecillo	1.06737	0.999961	1.00869	1.01163	1.03023	1.11089	1.15104	0.975789	1.04857	1.08741	1.04916	1.02357	1.07474	-1.34576
152	50	0	Montecillo	1.06737	0.999961	1.00869	1.01163	1.03023	1.11089	1.15104	0.975789	1.04857	1.08741	1.04916	1.02357	1.07474	-1.34576
153	30	0	Montecillo	1.06737	0.999961	1.00869	1.01163	1.03023	1.11089	1.15104	0.975789	1.04857	1.08741	1.04916	1.02357	1.07474	-1.34576
154	40	0	Montecillo	1.06737	0.999961	1.00869	1.01163	1.03023	1.11089	1.15104	0.975789	1.04857	1.08741	1.04916	1.02357	1.07474	-1.34576
155	40	0	Montecillo	1.06737	0.999961	1.00869	1.01163	1.03023	1.11089	1.15104	0.975789	1.04857	1.08741	1.04916	1.02357	1.07474	-1.34576
156	40	0	Montecillo	1.06737	0.999961	1.00869	1.01163	1.03023	1.11089	1.15104	0.975789	1.04857	1.08741	1.04916	1.02357	1.07474	-1.34576
157	35	0	Montecillo	1.06737	0.999961	1.00869	1.01163	1.03023	1.11089	1.15104	0.975789	1.04857	1.08741	1.04916	1.02357	1.07474	-1.34576
158	35	0	Montecillo	1.06737	0.999961	1.00869	1.01163	1.03023	1.11089	1.15104	0.975789	1.04857	1.08741	1.04916	1.02357	1.07474	-1.34576
159	20	0	Montecillo	1.06737	0.999961	1.00869	1.01163	1.03023	1.11089	1.15104	0.975789	1.04857	1.08741	1.04916	1.02357	1.07474	-1.34576
160	20	0	Montecillo	1.06737	0.999961	1.00869	1.01163	1.03023	1.11089	1.15104	0.975789	1.04857	1.08741	1.04916	1.02357	1.07474	-1.34576
161	70	1	Montecillo	1.06737	0.999961	1.00869	1.01163	1.03023	1.11089	1.15104	0.975789	1.04857	1.08741	1.04916	1.02357	1.07474	-1.34576
162	20	0	Montecillo	1.06737	0.999961	1.00869	1.01163	1.03023	1.11089	1.15104	0.975789	1.04857	1.08741	1.04916	1.02357	1.07474	-1.34576
163	15	0	Montecillo	1.06737	0.999961	1.00869	1.01163	1.03023	1.11089	1.15104	0.975789	1.04857	1.08741	1.04916	1.02357	1.07474	-1.34576
164	45	0	Montecillo	1.06737	0.999961	1.00869	1.01163	1.03023	1.11089	1.15104	0.975789	1.04857	1.08741	1.04916	1.02357	1.07474	-1.34576
165	40	0	Montecillo	1.06737	0.999961	1.00869	1.01163	1.03023	1.11089	1.15104	0.975789	1.04857	1.08741	1.04916	1.02357	1.07474	-1.34576
166	40	0	Montecillo	1.06737	0.999961	1.00869	1.01163	1.03023	1.11089	1.15104	0.975789	1.04857	1.08741	1.04916	1.02357	1.07474	-1.34576
167	40	0	Montecillo	1.06737	0.999961	1.00869	1.01163	1.03023	1.11089	1.15104	0.975789	1.04857	1.08741	1.04916	1.02357	1.07474	-1.34576
168	30	0	Montecillo	1.06737	0.999961	1.00869	1.01163	1.03023	1.11089	1.15104	0.975789	1.04857	1.08741	1.04916	1.02357	1.07474	-1.34576
169	20	0	Montecillo	1.06737	0.999961	1.00869	1.01163	1.03023	1.11089	1.15104	0.975789	1.04857	1.08741	1.04916	1.02357	1.07474	-1.34576
170	30	0	Montecillo	1.06737	0.999961	1.00869	1.01163	1.03023	1.11089	1.15104	0.975789	1.04857	1.08741	1.04916	1.02357	1.07474	-1.34576
171	30	0	Montecillo	1.06737	0.999961	1.00869	1.01163	1.03023	1.11089	1.15104	0.975789	1.04857	1.08741	1.04916	1.02357	1.07474	-1.34576
172	35	0	Montecillo	1.06737	0.999961	1.00869	1.01163	1.03023	1.11089	1.15104	0.975789	1.04857	1.08741	1.04916	1.02357	1.07474	-1.34576
173	35	0	Montecillo	1.06737	0.999961	1.00869	1.01163	1.03023	1.11089	1.15104	0.975789	1.04857	1.08741	1.04916	1.02357	1.07474	-1.34576
174	20	0	Montecillo	1.06737	0.999961	1.00869	1.01163	1.03023	1.11089	1.15104	0.975789	1.04857	1.08741	1.04916	1.02357	1.07474	-1.34576
175	20	0	Montecillo	1.06737	0.999961	1.00869	1.01163	1.03023	1.11089	1.15104	0.975789	1.04857	1.08741	1.04916	1.02357	1.07474	-1.34576
176	30	0	Montecillo	1.06737	0.999961	1.00869	1.01163	1.03023	1.11089	1.15104	0.975789	1.04857	1.08741	1.04916	1.02357	1.07474	-1.34576
177	30	0	Montecillo	1.06737	0.999961	1.00869	1.01163	1.03023	1.11089	1.15104	0.975789	1.04857	1.08741	1.04916	1.02357	1.07474	-1.34576
178	30	0	Montecillo	1.06737	0.999961	1.00869	1.01163	1.03023	1.11089	1.15104	0.975789	1.04857	1.08741	1.04916	1.02357	1.07474	-1.34576
179	30	0	Montecillo	1.06737	0.999961	1.00869	1.01163	1.03023	1.11089	1.15104	0.975789	1.04857	1.08741	1.04916	1.02357	1.07474	-1.34576
180	20	0	Montecillo	1.06737	0.999961	1.00869	1.01163	1.03023	1.11089	1.15104	0.975789	1.04857	1.08741	1.04916	1.02357	1.07474	-1.34576
181	20	0	Montecillo	1.06737	0.999961	1.00869	1.01163	1.03023	1.11089	1.15104	0.975789	1.04857	1.08741	1.04916	1.02357	1.07474	-1.34576
182	30	0	Montecillo	1.06737	0.999961	1.00869	1.01163	1.03023	1.11089	1.15104	0.975789	1.04857	1.08741	1.04916	1.02357	1.07474	-1.34576
183	45	0	Montecillo	1.06737	0.999961	1.00869	1.01163	1.03023	1.11089	1.15104	0.975789	1.04857	1.08741	1.04916	1.02357	1.07474	-1.34576
184	20	0	Montecillo	1.06737	0.999961	1.00869	1.01163	1.03023	1.11089	1.15104	0.975789	1.04857	1.08741	1.04916	1.02357	1.07474	-1.34576
185	20	0	Montecillo	1.06737	0.999961	1.00869	1.01163	1.03023	1.11089	1.15104	0.975789	1.04857	1.08741	1.04916	1.02357	1.07474	-1.34576
186	20	0	Montecillo	1.06737	0.999961	1.00869	1.01163	1.03023	1.11089	1.15104	0.975789	1.04857	1.08741	1.04916	1.02357	1.07474	-1.34576
187	30	0	Montecillo	1.06737	0.999961	1.00869	1.01163	1.03023	1.11089	1.15104	0.975789	1.04857	1.08741	1.04916	1.02357	1.07474	-1.34576
188	30	0	Montecillo	1.06737	0.999961	1.00869	1.01163	1.03023	1.11089	1.15104	0.975789	1.04857	1.08741	1.04916	1.02357	1.07474	-1.34576
189	40	0	Montecillo	1.06737	0.999961	1.00869	1.01163	1.03023	1.11089	1.15104	0.975789	1.04857	1.08741	1.04916	1.02357	1.07474	-1.34576
190	60	0	Montecillo	1.06737	0.999961	1.00869	1.01163	1.03023	1.11089	1.15104	0.975789	1.04857	1.08741	1.04916	1.02357	1.07474	-1.34576
191	40	0	Montecillo	1.06737	0.999961	1.00869	1.01163	1.03023	1.11089	1.15104	0.975789	1.04857	1.08741	1.04916	1.02357	1.07474	-1.34576
192	55	0	Montecillo	1.06737	0.999961	1.00869	1.01163	1.03023	1.11089	1.15104	0.975789	1.04857	1.08741	1.04916	1.02357	1.07474	-1.34576
193	100	1	Montecillo	1.06737	0.999961	1.00869	1.01163	1.03023	1.11089	1.15104	0.975789	1.04857	1.08741	1.04916	1.02357	1.07474	-1.34576
194	40	0	Montecillo	1.06737	0.999961	1.00869	1.01163	1.03023	1.11089	1.15104	0.975789	1.04857	1.08741	1.04916	1.02357	1.07474	-1.34576
195	20	0	Montecillo	1.06737	0.999961	1.00869	1.01163	1.03023	1.11089	1.15104	0.975789	1.04857	1.08741	1.04916	1.02357	1.07474	-1.34576
196	45	0	Montecillo	1.06737	0.999961	1.00869	1.01163	1.03023	1.11089	1.15104	0.975789	1.04857	1.08741	1.04916	1.02357	1.07474	-1.34576
197	80	0	Montecillo	1.06737	0.999961	1.00869	1.01163	1.03023	1.11089	1.15104	0.975789	1.04857	1.08741	1.04916	1.02357	1.07474	-1.34576
198	30	0	Montecillo	1.06737	0.999961	1.00869	1.01163	1.03023	1.11089	1.15104	0.975789	1.04857	1.08741	1.04916	1.02357	1.07474	-1.34576
199	70	1	Montecillo	1.06737	0.999961	1.00869	1.01163	1.03023	1.11089	1.15104	0.975789	1.04857	1.08741	1.04916	1.02357	1.07474	-1.34576
200	60	1	Montecillo	1.06737	0.999961	1.00869	1.01163	1.03023	1.11089	1.15104	0.975789	1.04857	1.08741	1.04916	1.02357	1.07474	-1.34576
201	85	0	Montecillo	1.06737	0.999961	1.00869	1.01163	1.03023	1.11089	1.15104	0.975789	1.04857	1.08741	1.04916	1.02357	1.07474	-1.34576
202	30	0	Montecillo	1.06737	0.999961	1.00869	1.01163	1.03023	1.11089	1.15104	0.975789	1.04857	1.08741	1.04916	1.02357	1.07474	-1.34576
203	60	0	Montecillo	1.06737	0.999961	1.00869	1.01163	1.03023	1.11089	1.15104	0.975789	1.04857	1.08741	1.04916	1.02357	1.07474	-1.34576
204	50	1	Montecillo	1.06737	0.999961	1.00869	1.01163	1.03023	1.11089	1.15104	0.975789	1.04857	1.08741	1.04916	1.02357	1.07474	-1.34576
205	40	0	Montecillo	1.06737	0.999961	1.00869	1.01163	1.03023	1.11089	1.15104	0.975789	1.04857	1.08741	1.04916	1.02357	1.07474	-1.34576
206	30	0	Montecillo	1.06737	0.999961	1.00869	1.01163	1.03023	1.11089	1.15104	0.975789	1.04857	1.08741	1.04916	1.02357	1.07474	-1.34576
207	60	0	Montecillo	1.06737	0.999961	1.00869	1.01163	1.03023	1.11089	1.15104	0.975789	1.04857	1.08741	1.04916	1.02357	1.07474	-1.34576
208	60	0	Montecillo	1.06737	0.999961	1.00869	1.01163	1.03023	1.11089	1.15104	0.975789	1.04857	1.08741	1.04916	1.02357	1.07474	-1.34576
209	80	0	Montecillo	1.06737	0.999961	1.00869	1.01163	1.03023	1.11089	1.15104	0.975789	1.04857	1.08741	1.04916	1.02357	1.07474	-1.34576
210	80	0	Montecillo	1.06737	0.999961	1.00869	1.01163	1.03023	1.11089	1.15104	0.975789	1.04857	1.08741	1.04916	1.02357	1.07474	-1.34576
211	70	0	Montecillo	1.06737	0.999961	1.00869	1.01163	1.03023	1.11089	1.15104	0.975789	1.04857	1.08741	1.04916	1.02357	1.07474	-1.34576
212	30	0	Montecillo	1.06737	0.999961	1.00869	1.01163	1.03023	1.11089	1.15104	0.975789	1.04857	1.08741	1.04916	1.02357	1.07474	-1.34576
213	30	0	Montecillo	1.06737	0.999961	1.00869	1.01163	1.03023	1.11089	1.15104	0.975789	1.04857	1.08741	1.04916	1.02357	1.07474	-1.34576
214	20	0	Montecillo	1.06737	0.999961	1.00869	1.01163	1.03023	1.11089	1.15104	0.975789	1.04857	1.08741	1.04916	1.02357	1.07474	-1.34576
215	30	0	Montecillo	1.06737	0.999961	1.00869	1.01163	1.03023	1.11089	1.15104	0.975789	1.04857	1.08741	1.04916	1.02357	1.07474	-1.34576
216	30	0	Montecillo	1.06737	0.999961	1.00869	1.01163	1.03023	1.11089	1.15104	0.975789	1.04857	1.08741	1.04916	1.02357	1.07474	-1.34576
217	20	0	Montecillo	1.06737	0.999961	1.00869	1.01163	1.03023	1.11089	1.15104	0.975789	1.04857	1.08741	1.04916	1.02357	1.07474	-1.34576
218	20	0	Montecillo	1.06737	0.999961	1.00869	1.01163	1.03023	1.11089	1.15104	0.975789	1.04857	1.08741	1.04916	1.02357	1.07474	-1.34576
219	30	0	Montecillo	1.06737	0.999961	1.00869	1.01163	1.03023	1.11089	1.15104	0.975789	1.04857	1.08741	1.04916	1.02357	1.07474	-1.34576
220	30	0	Montecillo	1.06737	0.999961	1.00869	1.01163	1.03023	1.11089	1.15104	0.975789	1.04857	1.08741	1.04916	1.02357	1.07474	-1.34576
221	50	0	Montecillo	1.06737	0.999961	1.00869	1.01163	1.03023	1.11089	1.15104	0.975789	1.04857	1.08741	1.04916	1.02357	1.07474	-1.34576
222	30	0	Montecillo	1.06737	0.999961	1.00869	1.01163	1.03023	1.11089	1.15104	0.975789	1.04857	1.08741	1.04916	1.02357	1.07474	-1.34576
223	30	0	Montecillo	1.06737	0.999961	1.00869	1.01163	1.03023	1.11089	1.15104	0.975789	1.04857	1.08741	1.04916	1.02357	1.07474	-1.34576
224	20	0	Montecillo	1.06737	0.999961	1.00869	1.01163	1.03023	1.11089	1.15104	0.975789	1.04857	1.08741	1.04916	1.02357	1.07474	-1.34576
225	100	1	Montecillo	1.06737	0.999961	1.00869	1.01163	1.03023	1.11089	1.15104	0.975789	1.04857	1.08741	1.04916	1.02357	1.07474	-1.34576
226	40	0	Montecillo	1.06737	0.999961	1.00869	1.01163	1.03023	1.11089	1.15104	0.975789	1.04857	1.08741	1.04916	1.02357	1.07474	-1.34576
227	30	0	Montecillo	1.06737	0.999961	1.00869	1.01163	1.03023	1.11089	1.15104	0.975789	1.04857	1.08741	1.04916	1.02357	1.07474	-1.34576
228	70	0	Montecillo	1.06737	0.999961	1.00869	1.01163	1.03023	1.11089	1.15104	0.975789	1.04857	1.08741	1.04916	1.02357	1.07474	-1.34576
229	70	0	Montecillo	1.06737	0.999961	1.00869	1.01163	1.03023	1.11089	1.15104	0.975789	1.04857	1.08741	1.04916	1.02357	1.07474	-1.34576
230	70	1	Montecillo	1.06737	0.999961	1.00869	1.01163	1.03023	1.11089	1.15104	0.975789	1.04857	1.08741	1.04916	1.02357	1.07474	-1.34576
231	40	0	Montecillo	1.06737	0.999961	1.00869	1.01163	1.03023	1.11089	1.15104	0.975789	1.04857	1.08741	1.04916	1.02357	1.07474	-1.34576
232	30	0	Montecillo	1.06737	0.999961	1.00869	1.01163	1.03023	1.11089	1.15104	0.975789	1.04857	1.08741	1.04916	1.02357	1.07474	-1.34576
233	80	1	Montecillo	1.06737	0.999961	1.00869	1.01163	1.03023	1.11089	1.15104	0.975789	1.04857	1.08741	1.04916	1.02357	1.07474	-1.34576
234	40	0	Montecillo	1.06737	0.999961	1.00869	1.01163	1.03023	1.11089	1.15104	0.975789	1.04857	1.08741	1.04916	1.02357	1.07474	-1.34576
235	20	0	Montecillo	1.06737	0.999961	1.00869	1.01163	1.03023	1.11089	1.15104	0.975789	1.04857	1.08741	1.04916	1.02357	1.07474	-1.34576
236	20	0	Montecillo	1.06737	0.999961	1.00869	1.01163	1.03023	1.11089	1.15104	0.975789	1.04857	1.08741	1.04916	1.02357	1.07474	-1.34576
237	40	0	Montecillo	1.06737	0.999961	1.00869	1.01163	1.03023	1.11089	1.15104	0.975789	1.04857	1.08741	1.04916	1.02357	1.07474	-1.34576
238	105	1	Montecillo	1.06737	0.999961	1.00869	1.01163	1.03023	1.11089	1.15104	0.975789	1.04857	1.08741	1.04916	1.02357	1.07474	-1.34576
239	100	1	Montecillo	1.06737	0.999961	1.00869	1.01163	1.03023	1.11089	1.15104	0.975789	1.04857	1.08741	1.04916	1.02357	1.07474	-1.34576
240	60	1	Montecillo	1.06737	0.999961	1.00869	1.01163	1.03023	1.11089	1.15104	0.975789	1.04857	1.08741	1.04916	1.02357	1.07474	-1.34576
241	60	1	Montecillo	1.06737	0.999961	1.00869	1.01163	1.03023	1.11089	1.15104	0.975789	1.04857	1.08741	1.04916	1.02357	1.07474	-1.34576
242	70	1	Montecillo	1.06737	0.999961	1.00869	1.01163	1.03023	1.11089	1.15104	0.975789	1.04857	1.08741	1.04916	1.02357	1.07474	-1.34576
243	30	0	Montecillo	1.06737	0.999961	1.00869	1.01163	1.03023	1.11089	1.15104	0.975789	1.04857	1.08741	1.04916	1.02357	1.07474	-1.34576
244	20	0	Montecillo	1.06737	0.999961	1.00869	1.01163	1.03023	1.11089	1.15104	0.975789	1.04857	1.08741	1.04916	1.02357	1.07474	-1.34576
245	20	0	Montecillo	1.06737	0.999961	1.00869	1.01163	1.03023	1.11089	1.15104	0.975789	1.04857	1.08741	1.04916	1.02357	1.07474	-1.34576
246	20	0	Montecillo	1.06737	0.999961	1.00869	1.01163	1.03023	1.11089	1.15104	0.975789	1.04857	1.08741	1.04916	1.02357	1.07474	-1.34576
247	70	1	Montecillo	1.06737	0.999961	1.00869	1.01163	1.03023	1.11089	1.15104	0.975789	1.04857	1.08741	1.04916	1.02357	1.07474	-1.34576
248	20	0	Montecillo	1.06737	0.999961	1.00869	1.01163	1.03023	1.11089	1.15104	0.975789	1.04857	1.08741	1.04916	1.02357	1.07474	-1.34576
249	40	0	Montecillo	1.06737	0.999961	1.00869	1.01163	1.03023	1.11089	1.15104	0.975789	1.04857	1.08741	1.04916	1.02357	1.07474	-1.34576
250	25	0	Montecillo	1.06737	0.999961	1.00869	1.01163	1.03023	1.11089	1.15104	0.975789	1.04857	1.08741	1.04916	1.02357	1.07474	-1.34576
251	30	0	Montecillo	1.06737	0.999961	1.00869	1.01163	1.03023	1.11089	1.15104	0.975789	1.04857	1.08741	1.04916	1.02357	1.07474	-1.34576
252	20	0	Rabones Oeste	1.15564	1.01343	1.01621	1.11245	1.04576	1.08669	1.05952	1.1772	1.10551	1.12042	1.08928	1.0687	1.10987	-0.0464054
253	120	1	Rabones Oeste	1.15564	1.01343	1.01621	1.11245	1.04576	1.08669	1.05952	1.1772	1.10551	1.12042	1.08928	1.0687	1.10987	-0.0464054
254	30	0	Rabones Oeste	1.15564	1.01343	1.01621	1.11245	1.04576	1.08669	1.05952	1.1772	1.10551	1.12042	1.08928	1.0687	1.10987	-0.0464054
255	20	0	Rabones Oeste	1.15564	1.01343	1.01621	1.11245	1.04576	1.08669	1.05952	1.1772	1.10551	1.12042	1.08928	1.0687	1.10987	-0.0464054
256	80	1	Rabones Oeste	1.15564	1.01343	1.01621	1.11245	1.04576	1.08669	1.05952	1.1772	1.10551	1.12042	1.08928	1.0687	1.10987	-0.0464054
257	110	1	Rabones Oeste	1.15564	1.01343	1.01621	1.11245	1.04576	1.08669	1.05952	1.1772	1.10551	1.12042	1.08928	1.0687	1.10987	-0.0464054
258	90	1	Rabones Oeste	1.15564	1.01343	1.01621	1.11245	1.04576	1.08669	1.05952	1.1772	1.10551	1.12042	1.08928	1.0687	1.10987	-0.0464054
259	70	0	Rabones Oeste	1.15564	1.01343	1.01621	1.11245	1.04576	1.08669	1.05952	1.1772	1.10551	1.12042	1.08928	1.0687	1.10987	-0.0464054
260	60	0	Rabones Oeste	1.15564	1.01343	1.01621	1.11245	1.04576	1.08669	1.05952	1.1772	1.10551	1.12042	1.08928	1.0687	1.10987	-0.0464054
261	30	0	Rabones Oeste	1.15564	1.01343	1.01621	1.11245	1.04576	1.08669	1.05952	1.1772	1.10551	1.12042	1.08928	1.0687	1.10987	-0.0464054
262	20	0	Rabones Oeste	1.15564	1.01343	1.01621	1.11245	1.04576	1.08669	1.05952	1.1772	1.10551	1.12042	1.08928	1.0687	1.10987	-0.0464054
263	20	0	Rabones Oeste	1.15564	1.01343	1.01621	1.11245	1.04576	1.08669	1.05952	1.1772	1.10551	1.12042	1.08928	1.0687	1.10987	-0.0464054
264	30	0	Rabones Oeste	1.15564	1.01343	1.01621	1.11245	1.04576	1.08669	1.05952	1.1772	1.10551	1.12042	1.08928	1.0687	1.10987	-0.0464054
265	20	0	Rabones Oeste	1.15564	1.01343	1.01621	1.11245	1.04576	1.08669	1.05952	1.1772	1.10551	1.12042	1.08928	1.0687	1.10987	-0.0464054
266	40	0	Rabones Oeste	1.15564	1.01343	1.01621	1.11245	1.04576	1.08669	1.05952	1.1772	1.10551	1.12042	1.08928	1.0687	1.10987	-0.0464054
267	20	0	Rabones Oeste	1.15564	1.01343	1.01621	1.11245	1.04576	1.08669	1.05952	1.1772	1.10551	1.12042	1.08928	1.0687	1.10987	-0.0464054
268	50	1	Rabones Oeste	1.15564	1.01343	1.01621	1.11245	1.04576	1.08669	1.05952	1.1772	1.10551	1.12042	1.08928	1.0687	1.10987	-0.0464054
269	40	1	Rabones Oeste	1.15564	1.01343	1.01621	1.11245	1.04576	1.08669	1.05952	1.1772	1.10551	1.12042	1.08928	1.0687	1.10987	-0.0464054
270	60	1	Rabones Oeste	1.15564	1.01343	1.01621	1.11245	1.04576	1.08669	1.05952	1.1772	1.10551	1.12042	1.08928	1.0687	1.10987	-0.0464054
271	20	0	Rabones Oeste	1.15564	1.01343	1.01621	1.11245	1.04576	1.08669	1.05952	1.1772	1.10551	1.12042	1.08928	1.0687	1.10987	-0.0464054
272	25	0	Rabones Oeste	1.15564	1.01343	1.01621	1.11245	1.04576	1.08669	1.05952	1.1772	1.10551	1.12042	1.08928	1.0687	1.10987	-0.0464054
273	25	0	Rabones Oeste	1.15564	1.01343	1.01621	1.11245	1.04576	1.08669	1.05952	1.1772	1.10551	1.12042	1.08928	1.0687	1.10987	-0.0464054
274	20	0	Rabones Este	1.03794	1.01044	1.0117	1.08682	1.04576	1.07862	1.02256	1.11854	1.03434	1.0961	1.05428	1.03853	1.07003	-0.306275
275	20	0	Rabones Este	1.03794	1.01044	1.0117	1.08682	1.04576	1.07862	1.02256	1.11854	1.03434	1.0961	1.05428	1.03853	1.07003	-0.306275
276	10	0	Rabones Este	1.03794	1.01044	1.0117	1.08682	1.04576	1.07862	1.02256	1.11854	1.03434	1.0961	1.05428	1.03853	1.07003	-0.306275
277	35	0	Rabones Este	1.03794	1.01044	1.0117	1.08682	1.04576	1.07862	1.02256	1.11854	1.03434	1.0961	1.05428	1.03853	1.07003	-0.306275
278	55	0	Rabones Este	1.03794	1.01044	1.0117	1.08682	1.04576	1.07862	1.02256	1.11854	1.03434	1.0961	1.05428	1.03853	1.07003	-0.306275
279	30	0	Rabones Este	1.03794	1.01044	1.0117	1.08682	1.04576	1.07862	1.02256	1.11854	1.03434	1.0961	1.05428	1.03853	1.07003	-0.306275
280	35	0	Rabones Este	1.03794	1.01044	1.0117	1.08682	1.04576	1.07862	1.02256	1.11854	1.03434	1.0961	1.05428	1.03853	1.07003	-0.306275
281	28	0	Rabones Este	1.03794	1.01044	1.0117	1.08682	1.04576	1.07862	1.02256	1.11854	1.03434	1.0961	1.05428	1.03853	1.07003	-0.306275
282	40	1	Rabones Este	1.03794	1.01044	1.0117	1.08682	1.04576	1.07862	1.02256	1.11854	1.03434	1.0961	1.05428	1.03853	1.07003	-0.306275
283	25	0	Rabones Este	1.03794	1.01044	1.0117	1.08682	1.04576	1.07862	1.02256	1.11854	1.03434	1.0961	1.05428	1.03853	1.07003	-0.306275
284	20	1	Rabones Este	1.03794	1.01044	1.0117	1.08682	1.04576	1.07862	1.02256	1.11854	1.03434	1.0961	1.05428	1.03853	1.07003	-0.306275
285	40	1	Rabones Este	1.03794	1.01044	1.0117	1.08682	1.04576	1.07862	1.02256	1.11854	1.03434	1.0961	1.05428	1.03853	1.07003	-0.306275
286	25	0	Rabones Este	1.03794	1.01044	1.0117	1.08682	1.04576	1.07862	1.02256	1.11854	1.03434	1.0961	1.05428	1.03853	1.07003	-0.306275
287	50	1	Rabones Este	1.03794	1.01044	1.0117	1.08682	1.04576	1.07862	1.02256	1.11854	1.03434	1.0961	1.05428	1.03853	1.07003	-0.306275
288	40	0	Rabones Este	1.03794	1.01044	1.0117	1.08682	1.04576	1.07862	1.02256	1.11854	1.03434	1.0961	1.05428	1.03853	1.07003	-0.306275
289	30	0	Rabones Este	1.03794	1.01044	1.0117	1.08682	1.04576	1.07862	1.02256	1.11854	1.03434	1.0961	1.05428	1.03853	1.07003	-0.306275
290	20	0	Rabones Este	1.03794	1.01044	1.0117	1.08682	1.04576	1.07862	1.02256	1.11854	1.03434	1.0961	1.05428	1.03853	1.07003	-0.306275
291	15	0	Rabones Este	1.03794	1.01044	1.0117	1.08682	1.04576	1.07862	1.02256	1.11854	1.03434	1.0961	1.05428	1.03853	1.07003	-0.306275
292	45	1	Rabones Este	1.03794	1.01044	1.0117	1.08682	1.04576	1.07862	1.02256	1.11854	1.03434	1.0961	1.05428	1.03853	1.07003	-0.306275
293	40	0	Rabones Este	1.03794	1.01044	1.0117	1.08682	1.04576	1.07862	1.02256	1.11854	1.03434	1.0961	1.05428	1.03853	1.07003	-0.306275
294	60	1	Rabones Este	1.03794	1.01044	1.0117	1.08682	1.04576	1.07862	1.02256	1.11854	1.03434	1.0961	1.05428	1.03853	1.07003	-0.306275
295	40	1	Rabones Este	1.03794	1.01044	1.0117	1.08682	1.04576	1.07862	1.02256	1.11854	1.03434	1.0961	1.05428	1.03853	1.07003	-0.306275
296	40	0	Rabones Este	1.03794	1.01044	1.0117	1.08682	1.04576	1.07862	1.02256	1.11854	1.03434	1.0961	1.05428	1.03853	1.07003	-0.306275
297	60	1	Rabones Este	1.03794	1.01044	1.0117	1.08682	1.04576	1.07862	1.02256	1.11854	1.03434	1.0961	1.05428	1.03853	1.07003	-0.306275
298	15	0	Rabones Este	1.03794	1.01044	1.0117	1.08682	1.04576	1.07862	1.02256	1.11854	1.03434	1.0961	1.05428	1.03853	1.07003	-0.306275
299	55	0	Rabones Este	1.03794	1.01044	1.0117	1.08682	1.04576	1.07862	1.02256	1.11854	1.03434	1.0961	1.05428	1.03853	1.07003	-0.306275
300	60	1	Rabones Este	1.03794	1.01044	1.0117	1.08682	1.04576	1.07862	1.02256	1.11854	1.03434	1.0961	1.05428	1.03853	1.07003	-0.306275
301	30	0	Rabones Este	1.03794	1.01044	1.0117	1.08682	1.04576	1.07862	1.02256	1.11854	1.03434	1.0961	1.05428	1.03853	1.07003	-0.306275
302	40	1	Rabones Este	1.03794	1.01044	1.0117	1.08682	1.04576	1.07862	1.02256	1.11854	1.03434	1.0961	1.05428	1.03853	1.07003	-0.306275
303	40	0	Rabones Este	1.03794	1.01044	1.0117	1.08682	1.04576	1.07862	1.02256	1.11854	1.03434	1.0961	1.05428	1.03853	1.07003	-0.306275
304	35	0	Rabones Este	1.03794	1.01044	1.0117	1.08682	1.04576	1.07862	1.02256	1.11854	1.03434	1.0961	1.05428	1.03853	1.07003	-0.306275
305	35	0	Rabones Este	1.03794	1.01044	1.0117	1.08682	1.04576	1.07862	1.02256	1.11854	1.03434	1.0961	1.05428	1.03853	1.07003	-0.306275
306	60	1	Rabones Este	1.03794	1.01044	1.0117	1.08682	1.04576	1.07862	1.02256	1.11854	1.03434	1.0961	1.05428	1.03853	1.07003	-0.306275
307	65	0	Rabones Este	1.03794	1.01044	1.0117	1.08682	1.04576	1.07862	1.02256	1.11854	1.03434	1.0961	1.05428	1.03853	1.07003	-0.306275
308	50	0	Rabones Este	1.03794	1.01044	1.0117	1.08682	1.04576	1.07862	1.02256	1.11854	1.03434	1.0961	1.05428	1.03853	1.07003	-0.306275
309	60	0	Rabones Este	1.03794	1.01044	1.0117	1.08682	1.04576	1.07862	1.02256	1.11854	1.03434	1.0961	1.05428	1.03853	1.07003	-0.306275
310	25	0	Rabones Este	1.03794	1.01044	1.0117	1.08682	1.04576	1.07862	1.02256	1.11854	1.03434	1.0961	1.05428	1.03853	1.07003	-0.306275
311	90	0	Rabones Este	1.03794	1.01044	1.0117	1.08682	1.04576	1.07862	1.02256	1.11854	1.03434	1.0961	1.05428	1.03853	1.07003	-0.306275
312	70	0	Rabones Este	1.03794	1.01044	1.0117	1.08682	1.04576	1.07862	1.02256	1.11854	1.03434	1.0961	1.05428	1.03853	1.07003	-0.306275
313	35	1	Rabones Este	1.03794	1.01044	1.0117	1.08682	1.04576	1.07862	1.02256	1.11854	1.03434	1.0961	1.05428	1.03853	1.07003	-0.306275
314	30	0	Rabones Este	1.03794	1.01044	1.0117	1.08682	1.04576	1.07862	1.02256	1.11854	1.03434	1.0961	1.05428	1.03853	1.07003	-0.306275
315	28	0	Rabones Este	1.03794	1.01044	1.0117	1.08682	1.04576	1.07862	1.02256	1.11854	1.03434	1.0961	1.05428	1.03853	1.07003	-0.306275
316	40	1	Rabones Este	1.03794	1.01044	1.0117	1.08682	1.04576	1.07862	1.02256	1.11854	1.03434	1.0961	1.05428	1.03853	1.07003	-0.306275
317	40	0	Rabones Este	1.03794	1.01044	1.0117	1.08682	1.04576	1.07862	1.02256	1.11854	1.03434	1.0961	1.05428	1.03853	1.07003	-0.306275
318	30	1	Rabones Este	1.03794	1.01044	1.0117	1.08682	1.04576	1.07862	1.02256	1.11854	1.03434	1.0961	1.05428	1.03853	1.07003	-0.306275
319	15	0	Rabones Este	1.03794	1.01044	1.0117	1.08682	1.04576	1.07862	1.02256	1.11854	1.03434	1.0961	1.05428	1.03853	1.07003	-0.306275
320	20	0	Rabones Este	1.03794	1.01044	1.0117	1.08682	1.04576	1.07862	1.02256	1.11854	1.03434	1.0961	1.05428	1.03853	1.07003	-0.306275
321	30	0	Rabones Este	1.03794	1.01044	1.0117	1.08682	1.04576	1.07862	1.02256	1.11854	1.03434	1.0961	1.05428	1.03853	1.07003	-0.306275
322	30	0	Rabones Este	1.03794	1.01044	1.0117	1.08682	1.04576	1.07862	1.02256	1.11854	1.03434	1.0961	1.05428	1.03853	1.07003	-0.306275
323	50	1	Rabones Este	1.03794	1.01044	1.0117	1.08682	1.04576	1.07862	1.02256	1.11854	1.03434	1.0961	1.05428	1.03853	1.07003	-0.306275
324	50	0	Rabones Este	1.03794	1.01044	1.0117	1.08682	1.04576	1.07862	1.02256	1.11854	1.03434	1.0961	1.05428	1.03853	1.07003	-0.306275
325	30	0	Rabones Este	1.03794	1.01044	1.0117	1.08682	1.04576	1.07862	1.02256	1.11854	1.03434	1.0961	1.05428	1.03853	1.07003	-0.306275
326	50	0	Rabones Este	1.03794	1.01044	1.0117	1.08682	1.04576	1.07862	1.02256	1.11854	1.03434	1.0961	1.05428	1.03853	1.07003	-0.306275
327	60	1	Rabones Este	1.03794	1.01044	1.0117	1.08682	1.04576	1.07862	1.02256	1.11854	1.03434	1.0961	1.05428	1.03853	1.07003	-0.306275
328	30	1	Rabones Este	1.03794	1.01044	1.0117	1.08682	1.04576	1.07862	1.02256	1.11854	1.03434	1.0961	1.05428	1.03853	1.07003	-0.306275
329	30	1	Rabones Este	1.03794	1.01044	1.0117	1.08682	1.04576	1.07862	1.02256	1.11854	1.03434	1.0961	1.05428	1.03853	1.07003	-0.306275
330	60	0	Rabones Este	1.03794	1.01044	1.0117	1.08682	1.04576	1.07862	1.02256	1.11854	1.03434	1.0961	1.05428	1.03853	1.07003	-0.306275
331	20	0	Rabones Este	1.03794	1.01044	1.0117	1.08682	1.04576	1.07862	1.02256	1.11854	1.03434	1.0961	1.05428	1.03853	1.07003	-0.306275
332	50	0	Rabones Este	1.03794	1.01044	1.0117	1.08682	1.04576	1.07862	1.02256	1.11854	1.03434	1.0961	1.05428	1.03853	1.07003	-0.306275
333	30	0	Rabones Este	1.03794	1.01044	1.0117	1.08682	1.04576	1.07862	1.02256	1.11854	1.03434	1.0961	1.05428	1.03853	1.07003	-0.306275
334	35	0	Rabones Este	1.03794	1.01044	1.0117	1.08682	1.04576	1.07862	1.02256	1.11854	1.03434	1.0961	1.05428	1.03853	1.07003	-0.306275
335	25	0	Rabones Este	1.03794	1.01044	1.0117	1.08682	1.04576	1.07862	1.02256	1.11854	1.03434	1.0961	1.05428	1.03853	1.07003	-0.306275
336	20	0	Rabones Este	1.03794	1.01044	1.0117	1.08682	1.04576	1.07862	1.02256	1.11854	1.03434	1.0961	1.05428	1.03853	1.07003	-0.306275
337	35	0	Rabones Este	1.03794	1.01044	1.0117	1.08682	1.04576	1.07862	1.02256	1.11854	1.03434	1.0961	1.05428	1.03853	1.07003	-0.306275
338	20	0	Rabones Este	1.03794	1.01044	1.0117	1.08682	1.04576	1.07862	1.02256	1.11854	1.03434	1.0961	1.05428	1.03853	1.07003	-0.306275
339	23	0	Rabones Este	1.03794	1.01044	1.0117	1.08682	1.04576	1.07862	1.02256	1.11854	1.03434	1.0961	1.05428	1.03853	1.07003	-0.306275
340	45	0	Rabones Este	1.03794	1.01044	1.0117	1.08682	1.04576	1.07862	1.02256	1.11854	1.03434	1.0961	1.05428	1.03853	1.07003	-0.306275
341	20	0	Rabones Este	1.03794	1.01044	1.0117	1.08682	1.04576	1.07862	1.02256	1.11854	1.03434	1.0961	1.05428	1.03853	1.07003	-0.306275
342	60	0	Rabones Este	1.03794	1.01044	1.0117	1.08682	1.04576	1.07862	1.02256	1.11854	1.03434	1.0961	1.05428	1.03853	1.07003	-0.306275
343	30	0	Rabones Este	1.03794	1.01044	1.0117	1.08682	1.04576	1.07862	1.02256	1.11854	1.03434	1.0961	1.05428	1.03853	1.07003	-0.306275
344	30	0	Rabones Este	1.03794	1.01044	1.0117	1.08682	1.04576	1.07862	1.02256	1.11854	1.03434	1.0961	1.05428	1.03853	1.07003	-0.306275
345	30	0	Rabones Este	1.03794	1.01044	1.0117	1.08682	1.04576	1.07862	1.02256	1.11854	1.03434	1.0961	1.05428	1.03853	1.07003	-0.306275
346	20	0	Rabones Este	1.03794	1.01044	1.0117	1.08682	1.04576	1.07862	1.02256	1.11854	1.03434	1.0961	1.05428	1.03853	1.07003	-0.306275
347	30	0	Rabones Este	1.03794	1.01044	1.0117	1.08682	1.04576	1.07862	1.02256	1.11854	1.03434	1.0961	1.05428	1.03853	1.07003	-0.306275
348	30	0	Rabones Este	1.03794	1.01044	1.0117	1.08682	1.04576	1.07862	1.02256	1.11854	1.03434	1.0961	1.05428	1.03853	1.07003	-0.306275
349	35	1	Rabones Este	1.03794	1.01044	1.0117	1.08682	1.04576	1.07862	1.02256	1.11854	1.03434	1.0961	1.05428	1.03853	1.07003	-0.306275
350	40	1	Rabones Este	1.03794	1.01044	1.0117	1.08682	1.04576	1.07862	1.02256	1.11854	1.03434	1.0961	1.05428	1.03853	1.07003	-0.306275
351	40	0	Rabones Este	1.03794	1.01044	1.0117	1.08682	1.04576	1.07862	1.02256	1.11854	1.03434	1.0961	1.05428	1.03853	1.07003	-0.306275
352	30	0	Rabones Este	1.03794	1.01044	1.0117	1.08682	1.04576	1.07862	1.02256	1.11854	1.03434	1.0961	1.05428	1.03853	1.07003	-0.306275
353	40	1	Rabones Este	1.03794	1.01044	1.0117	1.08682	1.04576	1.07862	1.02256	1.11854	1.03434	1.0961	1.05428	1.03853	1.07003	-0.306275
354	10	0	Rabones Este	1.03794	1.01044	1.0117	1.08682	1.04576	1.07862	1.02256	1.11854	1.03434	1.0961	1.05428	1.03853	1.07003	-0.306275
355	20	1	Rabones Este	1.03794	1.01044	1.0117	1.08682	1.04576	1.07862	1.02256	1.11854	1.03434	1.0961	1.05428	1.03853	1.07003	-0.306275
356	15	0	Rabones Este	1.03794	1.01044	1.0117	1.08682	1.04576	1.07862	1.02256	1.11854	1.03434	1.0961	1.05428	1.03853	1.07003	-0.306275
357	10	0	Rabones Este	1.03794	1.01044	1.0117	1.08682	1.04576	1.07862	1.02256	1.11854	1.03434	1.0961	1.05428	1.03853	1.07003	-0.306275
358	15	0	Rabones Este	1.03794	1.01044	1.0117	1.08682	1.04576	1.07862	1.02256	1.11854	1.03434	1.0961	1.05428	1.03853	1.07003	-0.306275
359	20	0	Rabones Este	1.03794	1.01044	1.0117	1.08682	1.04576	1.07862	1.02256	1.11854	1.03434	1.0961	1.05428	1.03853	1.07003	-0.306275
360	30	1	Rabones Este	1.03794	1.01044	1.0117	1.08682	1.04576	1.07862	1.02256	1.11854	1.03434	1.0961	1.05428	1.03853	1.07003	-0.306275
361	20	1	Rabones Este	1.03794	1.01044	1.0117	1.08682	1.04576	1.07862	1.02256	1.11854	1.03434	1.0961	1.05428	1.03853	1.07003	-0.306275
362	20	0	Rabones Este	1.03794	1.01044	1.0117	1.08682	1.04576	1.07862	1.02256	1.11854	1.03434	1.0961	1.05428	1.03853	1.07003	-0.306275
363	30	0	Rabones Este	1.03794	1.01044	1.0117	1.08682	1.04576	1.07862	1.02256	1.11854	1.03434	1.0961	1.05428	1.03853	1.07003	-0.306275
364	30	0	Rabones Este	1.03794	1.01044	1.0117	1.08682	1.04576	1.07862	1.02256	1.11854	1.03434	1.0961	1.05428	1.03853	1.07003	-0.306275
365	40	0	Rabones Este	1.03794	1.01044	1.0117	1.08682	1.04576	1.07862	1.02256	1.11854	1.03434	1.0961	1.05428	1.03853	1.07003	-0.306275
366	35	0	Rabones Este	1.03794	1.01044	1.0117	1.08682	1.04576	1.07862	1.02256	1.11854	1.03434	1.0961	1.05428	1.03853	1.07003	-0.306275
367	45	0	Rabones Este	1.03794	1.01044	1.0117	1.08682	1.04576	1.07862	1.02256	1.11854	1.03434	1.0961	1.05428	1.03853	1.07003	-0.306275
368	50	0	Rabones Este	1.03794	1.01044	1.0117	1.08682	1.04576	1.07862	1.02256	1.11854	1.03434	1.0961	1.05428	1.03853	1.07003	-0.306275
369	50	0	Rabones Este	1.03794	1.01044	1.0117	1.08682	1.04576	1.07862	1.02256	1.11854	1.03434	1.0961	1.05428	1.03853	1.07003	-0.306275
370	50	1	Rabones Este	1.03794	1.01044	1.0117	1.08682	1.04576	1.07862	1.02256	1.11854	1.03434	1.0961	1.05428	1.03853	1.07003	-0.306275
371	30	0	Rabones Este	1.03794	1.01044	1.0117	1.08682	1.04576	1.07862	1.02256	1.11854	1.03434	1.0961	1.05428	1.03853	1.07003	-0.306275
372	15	0	Rabones Este	1.03794	1.01044	1.0117	1.08682	1.04576	1.07862	1.02256	1.11854	1.03434	1.0961	1.05428	1.03853	1.07003	-0.306275
373	40	1	Rabones Este	1.03794	1.01044	1.0117	1.08682	1.04576	1.07862	1.02256	1.11854	1.03434	1.0961	1.05428	1.03853	1.07003	-0.306275
374	20	0	Rabones Este	1.03794	1.01044	1.0117	1.08682	1.04576	1.07862	1.02256	1.11854	1.03434	1.0961	1.05428	1.03853	1.07003	-0.306275
375	25	0	Rabones Este	1.03794	1.01044	1.0117	1.08682	1.04576	1.07862	1.02256	1.11854	1.03434	1.0961	1.05428	1.03853	1.07003	-0.306275
376	90	1	Rabones Este	1.03794	1.01044	1.0117	1.08682	1.04576	1.07862	1.02256	1.11854	1.03434	1.0961	1.05428	1.03853	1.07003	-0.306275
377	60	1	Rabones Este	1.03794	1.01044	1.0117	1.08682	1.04576	1.07862	1.02256	1.11854	1.03434	1.0961	1.05428	1.03853	1.07003	-0.306275
378	60	1	Rabones Este	1.03794	1.01044	1.0117	1.08682	1.04576	1.07862	1.02256	1.11854	1.03434	1.0961	1.05428	1.03853	1.07003	-0.306275
379	70	1	Rabones Este	1.03794	1.01044	1.0117	1.08682	1.04576	1.07862	1.02256	1.11854	1.03434	1.0961	1.05428	1.03853	1.07003	-0.306275
380	60	1	Rabones Este	1.03794	1.01044	1.0117	1.08682	1.04576	1.07862	1.02256	1.11854	1.03434	1.0961	1.05428	1.03853	1.07003	-0.306275
381	15	0	Rabones Este	1.03794	1.01044	1.0117	1.08682	1.04576	1.07862	1.02256	1.11854	1.03434	1.0961	1.05428	1.03853	1.07003	-0.306275
382	15	0	Rabones Este	1.03794	1.01044	1.0117	1.08682	1.04576	1.07862	1.02256	1.11854	1.03434	1.0961	1.05428	1.03853	1.07003	-0.306275
383	25	0	Rabones Este	1.03794	1.01044	1.0117	1.08682	1.04576	1.07862	1.02256	1.11854	1.03434	1.0961	1.05428	1.03853	1.07003	-0.306275
384	15	0	Rabones Este	1.03794	1.01044	1.0117	1.08682	1.04576	1.07862	1.02256	1.11854	1.03434	1.0961	1.05428	1.03853	1.07003	-0.306275
385	30	0	Rabones Este	1.03794	1.01044	1.0117	1.08682	1.04576	1.07862	1.02256	1.11854	1.03434	1.0961	1.05428	1.03853	1.07003	-0.306275
386	30	0	Rabones Este	1.03794	1.01044	1.0117	1.08682	1.04576	1.07862	1.02256	1.11854	1.03434	1.0961	1.05428	1.03853	1.07003	-0.306275
387	40	1	Rabones Este	1.03794	1.01044	1.0117	1.08682	1.04576	1.07862	1.02256	1.11854	1.03434	1.0961	1.05428	1.03853	1.07003	-0.306275
388	40	1	Rabones Este	1.03794	1.01044	1.0117	1.08682	1.04576	1.07862	1.02256	1.11854	1.03434	1.0961	1.05428	1.03853	1.07003	-0.306275
389	40	1	Rabones Este	1.03794	1.01044	1.0117	1.08682	1.04576	1.07862	1.02256	1.11854	1.03434	1.0961	1.05428	1.03853	1.07003	-0.306275
390	20	0	Rabones Este	1.03794	1.01044	1.0117	1.08682	1.04576	1.07862	1.02256	1.11854	1.03434	1.0961	1.05428	1.03853	1.07003	-0.306275
391	30	1	Rabones Este	1.03794	1.01044	1.0117	1.08682	1.04576	1.07862	1.02256	1.11854	1.03434	1.0961	1.05428	1.03853	1.07003	-0.306275
392	30	1	Rabones Este	1.03794	1.01044	1.0117	1.08682	1.04576	1.07862	1.02256	1.11854	1.03434	1.0961	1.05428	1.03853	1.07003	-0.306275
393	30	1	Rabones Este	1.03794	1.01044	1.0117	1.08682	1.04576	1.07862	1.02256	1.11854	1.03434	1.0961	1.05428	1.03853	1.07003	-0.306275
394	40	0	Rabones Este	1.03794	1.01044	1.0117	1.08682	1.04576	1.07862	1.02256	1.11854	1.03434	1.0961	1.05428	1.03853	1.07003	-0.306275
395	30	0	Rabones Este	1.03794	1.01044	1.0117	1.08682	1.04576	1.07862	1.02256	1.11854	1.03434	1.0961	1.05428	1.03853	1.07003	-0.306275
396	40	1	Rabones Este	1.03794	1.01044	1.0117	1.08682	1.04576	1.07862	1.02256	1.11854	1.03434	1.0961	1.05428	1.03853	1.07003	-0.306275
397	35	0	Rabones Este	1.03794	1.01044	1.0117	1.08682	1.04576	1.07862	1.02256	1.11854	1.03434	1.0961	1.05428	1.03853	1.07003	-0.306275
398	30	0	Rabones Este	1.03794	1.01044	1.0117	1.08682	1.04576	1.07862	1.02256	1.11854	1.03434	1.0961	1.05428	1.03853	1.07003	-0.306275
399	30	0	Rabones Este	1.03794	1.01044	1.0117	1.08682	1.04576	1.07862	1.02256	1.11854	1.03434	1.0961	1.05428	1.03853	1.07003	-0.306275
400	40	1	Rabones Este	1.03794	1.01044	1.0117	1.08682	1.04576	1.07862	1.02256	1.11854	1.03434	1.0961	1.05428	1.03853	1.07003	-0.306275
401	40	0	Rabones Este	1.03794	1.01044	1.0117	1.08682	1.04576	1.07862	1.02256	1.11854	1.03434	1.0961	1.05428	1.03853	1.07003	-0.306275
402	20	0	Rabones Este	1.03794	1.01044	1.0117	1.08682	1.04576	1.07862	1.02256	1.11854	1.03434	1.0961	1.05428	1.03853	1.07003	-0.306275
403	30	0	Rabones Este	1.03794	1.01044	1.0117	1.08682	1.04576	1.07862	1.02256	1.11854	1.03434	1.0961	1.05428	1.03853	1.07003	-0.306275
404	40	1	Rabones Este	1.03794	1.01044	1.0117	1.08682	1.04576	1.07862	1.02256	1.11854	1.03434	1.0961	1.05428	1.03853	1.07003	-0.306275
405	40	1	Rabones Este	1.03794	1.01044	1.0117	1.08682	1.04576	1.07862	1.02256	1.11854	1.03434	1.0961	1.05428	1.03853	1.07003	-0.306275
406	40	0	Rabones Este	1.03794	1.01044	1.0117	1.08682	1.04576	1.07862	1.02256	1.11854	1.03434	1.0961	1.05428	1.03853	1.07003	-0.306275
407	40	1	Rabones Este	1.03794	1.01044	1.0117	1.08682	1.04576	1.07862	1.02256	1.11854	1.03434	1.0961	1.05428	1.03853	1.07003	-0.306275
408	20	0	Rabones Este	1.03794	1.01044	1.0117	1.08682	1.04576	1.07862	1.02256	1.11854	1.03434	1.0961	1.05428	1.03853	1.07003	-0.306275
409	40	1	Rabones Este	1.03794	1.01044	1.0117	1.08682	1.04576	1.07862	1.02256	1.11854	1.03434	1.0961	1.05428	1.03853	1.07003	-0.306275
410	40	1	Rabones Este	1.03794	1.01044	1.0117	1.08682	1.04576	1.07862	1.02256	1.11854	1.03434	1.0961	1.05428	1.03853	1.07003	-0.306275
411	30	0	Rabones Este	1.03794	1.01044	1.0117	1.08682	1.04576	1.07862	1.02256	1.11854	1.03434	1.0961	1.05428	1.03853	1.07003	-0.306275
412	20	0	Rabones Este	1.03794	1.01044	1.0117	1.08682	1.04576	1.07862	1.02256	1.11854	1.03434	1.0961	1.05428	1.03853	1.07003	-0.306275
413	30	0	Rabones Este	1.03794	1.01044	1.0117	1.08682	1.04576	1.07862	1.02256	1.11854	1.03434	1.0961	1.05428	1.03853	1.07003	-0.306275
414	15	0	Rabones Este	1.03794	1.01044	1.0117	1.08682	1.04576	1.07862	1.02256	1.11854	1.03434	1.0961	1.05428	1.03853	1.07003	-0.306275
415	20	0	Rabones Este	1.03794	1.01044	1.0117	1.08682	1.04576	1.07862	1.02256	1.11854	1.03434	1.0961	1.05428	1.03853	1.07003	-0.306275
416	15	0	Rabones Este	1.03794	1.01044	1.0117	1.08682	1.04576	1.07862	1.02256	1.11854	1.03434	1.0961	1.05428	1.03853	1.07003	-0.306275
417	30	0	Rabones Este	1.03794	1.01044	1.0117	1.08682	1.04576	1.07862	1.02256	1.11854	1.03434	1.0961	1.05428	1.03853	1.07003	-0.306275
418	20	0	Rabones Este	1.03794	1.01044	1.0117	1.08682	1.04576	1.07862	1.02256	1.11854	1.03434	1.0961	1.05428	1.03853	1.07003	-0.306275
419	40	0	Rabones Este	1.03794	1.01044	1.0117	1.08682	1.04576	1.07862	1.02256	1.11854	1.03434	1.0961	1.05428	1.03853	1.07003	-0.306275
420	30	0	Rabones Este	1.03794	1.01044	1.0117	1.08682	1.04576	1.07862	1.02256	1.11854	1.03434	1.0961	1.05428	1.03853	1.07003	-0.306275
421	30	0	Rabones Este	1.03794	1.01044	1.0117	1.08682	1.04576	1.07862	1.02256	1.11854	1.03434	1.0961	1.05428	1.03853	1.07003	-0.306275
422	30	0	Rabones Este	1.03794	1.01044	1.0117	1.08682	1.04576	1.07862	1.02256	1.11854	1.03434	1.0961	1.05428	1.03853	1.07003	-0.306275
423	30	0	Rabones Este	1.03794	1.01044	1.0117	1.08682	1.04576	1.07862	1.02256	1.11854	1.03434	1.0961	1.05428	1.03853	1.07003	-0.306275
424	50	0	Rabones Este	1.03794	1.01044	1.0117	1.08682	1.04576	1.07862	1.02256	1.11854	1.03434	1.0961	1.05428	1.03853	1.07003	-0.306275
425	30	0	Rabones Este	1.03794	1.01044	1.0117	1.08682	1.04576	1.07862	1.02256	1.11854	1.03434	1.0961	1.05428	1.03853	1.07003	-0.306275
426	20	0	Rabones Este	1.03794	1.01044	1.0117	1.08682	1.04576	1.07862	1.02256	1.11854	1.03434	1.0961	1.05428	1.03853	1.07003	-0.306275
427	30	0	Rabones Este	1.03794	1.01044	1.0117	1.08682	1.04576	1.07862	1.02256	1.11854	1.03434	1.0961	1.05428	1.03853	1.07003	-0.306275
428	20	0	Rabones Este	1.03794	1.01044	1.0117	1.08682	1.04576	1.07862	1.02256	1.11854	1.03434	1.0961	1.05428	1.03853	1.07003	-0.306275
429	15	0	Rabones Este	1.03794	1.01044	1.0117	1.08682	1.04576	1.07862	1.02256	1.11854	1.03434	1.0961	1.05428	1.03853	1.07003	-0.306275
430	30	0	Rabones Este	1.03794	1.01044	1.0117	1.08682	1.04576	1.07862	1.02256	1.11854	1.03434	1.0961	1.05428	1.03853	1.07003	-0.306275
431	30	0	Rabones Este	1.03794	1.01044	1.0117	1.08682	1.04576	1.07862	1.02256	1.11854	1.03434	1.0961	1.05428	1.03853	1.07003	-0.306275
432	30	0	Rabones Este	1.03794	1.01044	1.0117	1.08682	1.04576	1.07862	1.02256	1.11854	1.03434	1.0961	1.05428	1.03853	1.07003	-0.306275
433	30	0	Rabones Este	1.03794	1.01044	1.0117	1.08682	1.04576	1.07862	1.02256	1.11854	1.03434	1.0961	1.05428	1.03853	1.07003	-0.306275
434	30	0	Rabones Este	1.03794	1.01044	1.0117	1.08682	1.04576	1.07862	1.02256	1.11854	1.03434	1.0961	1.05428	1.03853	1.07003	-0.306275
435	30	0	Rabones Este	1.03794	1.01044	1.0117	1.08682	1.04576	1.07862	1.02256	1.11854	1.03434	1.0961	1.05428	1.03853	1.07003	-0.306275
436	20	0	Rabones Este	1.03794	1.01044	1.0117	1.08682	1.04576	1.07862	1.02256	1.11854	1.03434	1.0961	1.05428	1.03853	1.07003	-0.306275
437	30	0	Rabones Este	1.03794	1.01044	1.0117	1.08682	1.04576	1.07862	1.02256	1.11854	1.03434	1.0961	1.05428	1.03853	1.07003	-0.306275
438	20	0	Rabones Este	1.03794	1.01044	1.0117	1.08682	1.04576	1.07862	1.02256	1.11854	1.03434	1.0961	1.05428	1.03853	1.07003	-0.306275
439	20	0	Rabones Este	1.03794	1.01044	1.0117	1.08682	1.04576	1.07862	1.02256	1.11854	1.03434	1.0961	1.05428	1.03853	1.07003	-0.306275
440	20	0	Rabones Este	1.03794	1.01044	1.0117	1.08682	1.04576	1.07862	1.02256	1.11854	1.03434	1.0961	1.05428	1.03853	1.07003	-0.306275
441	15	0	Rabones Este	1.03794	1.01044	1.0117	1.08682	1.04576	1.07862	1.02256	1.11854	1.03434	1.0961	1.05428	1.03853	1.07003	-0.306275
442	30	0	Rabones Este	1.03794	1.01044	1.0117	1.08682	1.04576	1.07862	1.02256	1.11854	1.03434	1.0961	1.05428	1.03853	1.07003	-0.306275
443	15	0	Rabones Este	1.03794	1.01044	1.0117	1.08682	1.04576	1.07862	1.02256	1.11854	1.03434	1.0961	1.05428	1.03853	1.07003	-0.306275
444	20	0	Rabones Este	1.03794	1.01044	1.0117	1.08682	1.04576	1.07862	1.02256	1.11854	1.03434	1.0961	1.05428	1.03853	1.07003	-0.306275
445	20	0	Rabones Este	1.03794	1.01044	1.0117	1.08682	1.04576	1.07862	1.02256	1.11854	1.03434	1.0961	1.05428	1.03853	1.07003	-0.306275
446	20	0	Rabones Este	1.03794	1.01044	1.0117	1.08682	1.04576	1.07862	1.02256	1.11854	1.03434	1.0961	1.05428	1.03853	1.07003	-0.306275
447	20	0	Rabones Este	1.03794	1.01044	1.0117	1.08682	1.04576	1.07862	1.02256	1.11854	1.03434	1.0961	1.05428	1.03853	1.07003	-0.306275
448	20	0	Rabones Este	1.03794	1.01044	1.0117	1.08682	1.04576	1.07862	1.02256	1.11854	1.03434	1.0961	1.05428	1.03853	1.07003	-0.306275
449	40	0	Rabones Este	1.03794	1.01044	1.0117	1.08682	1.04576	1.07862	1.02256	1.11854	1.03434	1.0961	1.05428	1.03853	1.07003	-0.306275
450	35	0	Rabones Este	1.03794	1.01044	1.0117	1.08682	1.04576	1.07862	1.02256	1.11854	1.03434	1.0961	1.05428	1.03853	1.07003	-0.306275
451	20	0	Rabones Este	1.03794	1.01044	1.0117	1.08682	1.04576	1.07862	1.02256	1.11854	1.03434	1.0961	1.05428	1.03853	1.07003	-0.306275
452	35	0	Rabones Este	1.03794	1.01044	1.0117	1.08682	1.04576	1.07862	1.02256	1.11854	1.03434	1.0961	1.05428	1.03853	1.07003	-0.306275
453	60	1	Rabones Este	1.03794	1.01044	1.0117	1.08682	1.04576	1.07862	1.02256	1.11854	1.03434	1.0961	1.05428	1.03853	1.07003	-0.306275
454	120	1	Rabones Este	1.03794	1.01044	1.0117	1.08682	1.04576	1.07862	1.02256	1.11854	1.03434	1.0961	1.05428	1.03853	1.07003	-0.306275
455	60	1	Rabones Este	1.03794	1.01044	1.0117	1.08682	1.04576	1.07862	1.02256	1.11854	1.03434	1.0961	1.05428	1.03853	1.07003	-0.306275
456	30	0	Rabones Este	1.03794	1.01044	1.0117	1.08682	1.04576	1.07862	1.02256	1.11854	1.03434	1.0961	1.05428	1.03853	1.07003	-0.306275
457	70	0	Rabones Este	1.03794	1.01044	1.0117	1.08682	1.04576	1.07862	1.02256	1.11854	1.03434	1.0961	1.05428	1.03853	1.07003	-0.306275
458	100	0	Rabones Este	1.03794	1.01044	1.0117	1.08682	1.04576	1.07862	1.02256	1.11854	1.03434	1.0961	1.05428	1.03853	1.07003	-0.306275
459	60	0	Rabones Este	1.03794	1.01044	1.0117	1.08682	1.04576	1.07862	1.02256	1.11854	1.03434	1.0961	1.05428	1.03853	1.07003	-0.306275
460	50	0	Rabones Este	1.03794	1.01044	1.0117	1.08682	1.04576	1.07862	1.02256	1.11854	1.03434	1.0961	1.05428	1.03853	1.07003	-0.306275
461	80	1	Rabones Este	1.03794	1.01044	1.0117	1.08682	1.04576	1.07862	1.02256	1.11854	1.03434	1.0961	1.05428	1.03853	1.07003	-0.306275
462	70	0	Rabones Este	1.03794	1.01044	1.0117	1.08682	1.04576	1.07862	1.02256	1.11854	1.03434	1.0961	1.05428	1.03853	1.07003	-0.306275
463	60	1	Rabones Este	1.03794	1.01044	1.0117	1.08682	1.04576	1.07862	1.02256	1.11854	1.03434	1.0961	1.05428	1.03853	1.07003	-0.306275
464	55	1	Rabones Este	1.03794	1.01044	1.0117	1.08682	1.04576	1.07862	1.02256	1.11854	1.03434	1.0961	1.05428	1.03853	1.07003	-0.306275
465	50	0	Rabones Este	1.03794	1.01044	1.0117	1.08682	1.04576	1.07862	1.02256	1.11854	1.03434	1.0961	1.05428	1.03853	1.07003	-0.306275
466	50	0	Rabones Este	1.03794	1.01044	1.0117	1.08682	1.04576	1.07862	1.02256	1.11854	1.03434	1.0961	1.05428	1.03853	1.07003	-0.306275
467	50	1	Rabones Este	1.03794	1.01044	1.0117	1.08682	1.04576	1.07862	1.02256	1.11854	1.03434	1.0961	1.05428	1.03853	1.07003	-0.306275
468	150	1	Rabones Este	1.03794	1.01044	1.0117	1.08682	1.04576	1.07862	1.02256	1.11854	1.03434	1.0961	1.05428	1.03853	1.07003	-0.306275
469	160	1	Rabones Este	1.03794	1.01044	1.0117	1.08682	1.04576	1.07862	1.02256	1.11854	1.03434	1.0961	1.05428	1.03853	1.07003	-0.306275
470	60	1	Rabones Este	1.03794	1.01044	1.0117	1.08682	1.04576	1.07862	1.02256	1.11854	1.03434	1.0961	1.05428	1.03853	1.07003	-0.306275
471	170	1	Rabones Este	1.03794	1.01044	1.0117	1.08682	1.04576	1.07862	1.02256	1.11854	1.03434	1.0961	1.05428	1.03853	1.07003	-0.306275
472	140	1	Rabones Este	1.03794	1.01044	1.0117	1.08682	1.04576	1.07862	1.02256	1.11854	1.03434	1.0961	1.05428	1.03853	1.07003	-0.306275
473	40	1	Rabones Este	1.03794	1.01044	1.0117	1.08682	1.04576	1.07862	1.02256	1.11854	1.03434	1.0961	1.05428	1.03853	1.07003	-0.306275
474	40	1	Rabones Este	1.03794	1.01044	1.0117	1.08682	1.04576	1.07862	1.02256	1.11854	1.03434	1.0961	1.05428	1.03853	1.07003	-0.306275
475	60	0	Rabones Este	1.03794	1.01044	1.0117	1.08682	1.04576	1.07862	1.02256	1.11854	1.03434	1.0961	1.05428	1.03853	1.07003	-0.306275
476	100	1	Rabones Este	1.03794	1.01044	1.0117	1.08682	1.04576	1.07862	1.02256	1.11854	1.03434	1.0961	1.05428	1.03853	1.07003	-0.306275
477	35	1	Rabones Este	1.03794	1.01044	1.0117	1.08682	1.04576	1.07862	1.02256	1.11854	1.03434	1.0961	1.05428	1.03853	1.07003	-0.306275
478	55	1	Rabones Este	1.03794	1.01044	1.0117	1.08682	1.04576	1.07862	1.02256	1.11854	1.03434	1.0961	1.05428	1.03853	1.07003	-0.306275
479	90	1	Rabones Este	1.03794	1.01044	1.0117	1.08682	1.04576	1.07862	1.02256	1.11854	1.03434	1.0961	1.05428	1.03853	1.07003	-0.306275
480	35	0	Rabones Este	1.03794	1.01044	1.0117	1.08682	1.04576	1.07862	1.02256	1.11854	1.03434	1.0961	1.05428	1.03853	1.07003	-0.306275
481	150	1	Rabones Este	1.03794	1.01044	1.0117	1.08682	1.04576	1.07862	1.02256	1.11854	1.03434	1.0961	1.05428	1.03853	1.07003	-0.306275
482	70	0	Rabones Este	1.03794	1.01044	1.0117	1.08682	1.04576	1.07862	1.02256	1.11854	1.03434	1.0961	1.05428	1.03853	1.07003	-0.306275
483	45	0	Rabones Este	1.03794	1.01044	1.0117	1.08682	1.04576	1.07862	1.02256	1.11854	1.03434	1.0961	1.05428	1.03853	1.07003	-0.306275
484	45	0	Rabones Este	1.03794	1.01044	1.0117	1.08682	1.04576	1.07862	1.02256	1.11854	1.03434	1.0961	1.05428	1.03853	1.07003	-0.306275
485	180	1	Rabones Este	1.03794	1.01044	1.0117	1.08682	1.04576	1.07862	1.02256	1.11854	1.03434	1.0961	1.05428	1.03853	1.07003	-0.306275
486	160	1	Rabones Este	1.03794	1.01044	1.0117	1.08682	1.04576	1.07862	1.02256	1.11854	1.03434	1.0961	1.05428	1.03853	1.07003	-0.306275
487	60	1	Rabones Este	1.03794	1.01044	1.0117	1.08682	1.04576	1.07862	1.02256	1.11854	1.03434	1.0961	1.05428	1.03853	1.07003	-0.306275
488	45	0	Rabones Este	1.03794	1.01044	1.0117	1.08682	1.04576	1.07862	1.02256	1.11854	1.03434	1.0961	1.05428	1.03853	1.07003	-0.306275
489	25	0	Rabones Este	1.03794	1.01044	1.0117	1.08682	1.04576	1.07862	1.02256	1.11854	1.03434	1.0961	1.05428	1.03853	1.07003	-0.306275
490	25	0	Rabones Este	1.03794	1.01044	1.0117	1.08682	1.04576	1.07862	1.02256	1.11854	1.03434	1.0961	1.05428	1.03853	1.07003	-0.306275
491	50	0	Rabones Este	1.03794	1.01044	1.0117	1.08682	1.04576	1.07862	1.02256	1.11854	1.03434	1.0961	1.05428	1.03853	1.07003	-0.306275
492	30	0	Rabones Este	1.03794	1.01044	1.0117	1.08682	1.04576	1.07862	1.02256	1.11854	1.03434	1.0961	1.05428	1.03853	1.07003	-0.306275
493	25	0	Rabones Este	1.03794	1.01044	1.0117	1.08682	1.04576	1.07862	1.02256	1.11854	1.03434	1.0961	1.05428	1.03853	1.07003	-0.306275
494	70	0	Rabones Este	1.03794	1.01044	1.0117	1.08682	1.04576	1.07862	1.02256	1.11854	1.03434	1.0961	1.05428	1.03853	1.07003	-0.306275
495	60	0	Rabones Este	1.03794	1.01044	1.0117	1.08682	1.04576	1.07862	1.02256	1.11854	1.03434	1.0961	1.05428	1.03853	1.07003	-0.306275
496	60	0	Rabones Este	1.03794	1.01044	1.0117	1.08682	1.04576	1.07862	1.02256	1.11854	1.03434	1.0961	1.05428	1.03853	1.07003	-0.306275
497	60	0	Rabones Este	1.03794	1.01044	1.0117	1.08682	1.04576	1.07862	1.02256	1.11854	1.03434	1.0961	1.05428	1.03853	1.07003	-0.306275
498	60	0	Rabones Este	1.03794	1.01044	1.0117	1.08682	1.04576	1.07862	1.02256	1.11854	1.03434	1.0961	1.05428	1.03853	1.07003	-0.306275
499	35	0	Rabones Este	1.03794	1.01044	1.0117	1.08682	1.04576	1.07862	1.02256	1.11854	1.03434	1.0961	1.05428	1.03853	1.07003	-0.306275
500	80	1	Rabones Este	1.03794	1.01044	1.0117	1.08682	1.04576	1.07862	1.02256	1.11854	1.03434	1.0961	1.05428	1.03853	1.07003	-0.306275
501	40	0	Rabones Este	1.03794	1.01044	1.0117	1.08682	1.04576	1.07862	1.02256	1.11854	1.03434	1.0961	1.05428	1.03853	1.07003	-0.306275
502	35	0	Rabones Este	1.03794	1.01044	1.0117	1.08682	1.04576	1.07862	1.02256	1.11854	1.03434	1.0961	1.05428	1.03853	1.07003	-0.306275
503	25	0	Rabones Este	1.03794	1.01044	1.0117	1.08682	1.04576	1.07862	1.02256	1.11854	1.03434	1.0961	1.05428	1.03853	1.07003	-0.306275
504	40	0	Rabones Este	1.03794	1.01044	1.0117	1.08682	1.04576	1.07862	1.02256	1.11854	1.03434	1.0961	1.05428	1.03853	1.07003	-0.306275
505	40	0	Rabones Este	1.03794	1.01044	1.0117	1.08682	1.04576	1.07862	1.02256	1.11854	1.03434	1.0961	1.05428	1.03853	1.07003	-0.306275
506	160	1	Rabones Este	1.03794	1.01044	1.0117	1.08682	1.04576	1.07862	1.02256	1.11854	1.03434	1.0961	1.05428	1.03853	1.07003	-0.306275
507	30	0	Rabones Este	1.03794	1.01044	1.0117	1.08682	1.04576	1.07862	1.02256	1.11854	1.03434	1.0961	1.05428	1.03853	1.07003	-0.306275
508	30	0	Rabones Este	1.03794	1.01044	1.0117	1.08682	1.04576	1.07862	1.02256	1.11854	1.03434	1.0961	1.05428	1.03853	1.07003	-0.306275
509	30	0	Rabones Este	1.03794	1.01044	1.0117	1.08682	1.04576	1.07862	1.02256	1.11854	1.03434	1.0961	1.05428	1.03853	1.07003	-0.306275
510	30	0	Rabones Este	1.03794	1.01044	1.0117	1.08682	1.04576	1.07862	1.02256	1.11854	1.03434	1.0961	1.05428	1.03853	1.07003	-0.306275
511	40	1	Rabones Este	1.03794	1.01044	1.0117	1.08682	1.04576	1.07862	1.02256	1.11854	1.03434	1.0961	1.05428	1.03853	1.07003	-0.306275
512	30	0	Rabones Este	1.03794	1.01044	1.0117	1.08682	1.04576	1.07862	1.02256	1.11854	1.03434	1.0961	1.05428	1.03853	1.07003	-0.306275
513	30	0	Rabones Este	1.03794	1.01044	1.0117	1.08682	1.04576	1.07862	1.02256	1.11854	1.03434	1.0961	1.05428	1.03853	1.07003	-0.306275
514	30	0	Rabones Este	1.03794	1.01044	1.0117	1.08682	1.04576	1.07862	1.02256	1.11854	1.03434	1.0961	1.05428	1.03853	1.07003	-0.306275
515	30	0	Rabones Este	1.03794	1.01044	1.0117	1.08682	1.04576	1.07862	1.02256	1.11854	1.03434	1.0961	1.05428	1.03853	1.07003	-0.306275
516	140	1	Rabones Este	1.03794	1.01044	1.0117	1.08682	1.04576	1.07862	1.02256	1.11854	1.03434	1.0961	1.05428	1.03853	1.07003	-0.306275
517	60	0	Rabones Este	1.03794	1.01044	1.0117	1.08682	1.04576	1.07862	1.02256	1.11854	1.03434	1.0961	1.05428	1.03853	1.07003	-0.306275
518	80	1	Rabones Este	1.03794	1.01044	1.0117	1.08682	1.04576	1.07862	1.02256	1.11854	1.03434	1.0961	1.05428	1.03853	1.07003	-0.306275
519	30	0	Rabones Este	1.03794	1.01044	1.0117	1.08682	1.04576	1.07862	1.02256	1.11854	1.03434	1.0961	1.05428	1.03853	1.07003	-0.306275
520	50	1	Rabones Este	1.03794	1.01044	1.0117	1.08682	1.04576	1.07862	1.02256	1.11854	1.03434	1.0961	1.05428	1.03853	1.07003	-0.306275
521	15	0	Rabones Este	1.03794	1.01044	1.0117	1.08682	1.04576	1.07862	1.02256	1.11854	1.03434	1.0961	1.05428	1.03853	1.07003	-0.306275
522	30	0	Rabones Este	1.03794	1.01044	1.0117	1.08682	1.04576	1.07862	1.02256	1.11854	1.03434	1.0961	1.05428	1.03853	1.07003	-0.306275
523	150	1	Rabones Este	1.03794	1.01044	1.0117	1.08682	1.04576	1.07862	1.02256	1.11854	1.03434	1.0961	1.05428	1.03853	1.07003	-0.306275
524	80	1	Rabones Este	1.03794	1.01044	1.0117	1.08682	1.04576	1.07862	1.02256	1.11854	1.03434	1.0961	1.05428	1.03853	1.07003	-0.306275
525	55	0	Rabones Este	1.03794	1.01044	1.0117	1.08682	1.04576	1.07862	1.02256	1.11854	1.03434	1.0961	1.05428	1.03853	1.07003	-0.306275
526	90	0	Rabones Este	1.03794	1.01044	1.0117	1.08682	1.04576	1.07862	1.02256	1.11854	1.03434	1.0961	1.05428	1.03853	1.07003	-0.306275
527	30	0	Rabones Este	1.03794	1.01044	1.0117	1.08682	1.04576	1.07862	1.02256	1.11854	1.03434	1.0961	1.05428	1.03853	1.07003	-0.306275
528	20	0	Rabones Este	1.03794	1.01044	1.0117	1.08682	1.04576	1.07862	1.02256	1.11854	1.03434	1.0961	1.05428	1.03853	1.07003	-0.306275
529	80	0	Rabones Este	1.03794	1.01044	1.0117	1.08682	1.04576	1.07862	1.02256	1.11854	1.03434	1.0961	1.05428	1.03853	1.07003	-0.306275
530	90	0	Rabones Este	1.03794	1.01044	1.0117	1.08682	1.04576	1.07862	1.02256	1.11854	1.03434	1.0961	1.05428	1.03853	1.07003	-0.306275
531	90	0	Rabones Este	1.03794	1.01044	1.0117	1.08682	1.04576	1.07862	1.02256	1.11854	1.03434	1.0961	1.05428	1.03853	1.07003	-0.306275
532	90	0	Rabones Este	1.03794	1.01044	1.0117	1.08682	1.04576	1.07862	1.02256	1.11854	1.03434	1.0961	1.05428	1.03853	1.07003	-0.306275
533	50	1	Rabones Este	1.03794	1.01044	1.0117	1.08682	1.04576	1.07862	1.02256	1.11854	1.03434	1.0961	1.05428	1.03853	1.07003	-0.306275
534	45	0	Rabones Este	1.03794	1.01044	1.0117	1.08682	1.04576	1.07862	1.02256	1.11854	1.03434	1.0961	1.05428	1.03853	1.07003	-0.306275
535	30	0	Rabones Este	1.03794	1.01044	1.0117	1.08682	1.04576	1.07862	1.02256	1.11854	1.03434	1.0961	1.05428	1.03853	1.07003	-0.306275
536	20	0	Rabones Este	1.03794	1.01044	1.0117	1.08682	1.04576	1.07862	1.02256	1.11854	1.03434	1.0961	1.05428	1.03853	1.07003	-0.306275
537	45	0	Rabones Este	1.03794	1.01044	1.0117	1.08682	1.04576	1.07862	1.02256	1.11854	1.03434	1.0961	1.05428	1.03853	1.07003	-0.306275
538	50	1	Rabones Este	1.03794	1.01044	1.0117	1.08682	1.04576	1.07862	1.02256	1.11854	1.03434	1.0961	1.05428	1.03853	1.07003	-0.306275
539	70	0	Rabones Este	1.03794	1.01044	1.0117	1.08682	1.04576	1.07862	1.02256	1.11854	1.03434	1.0961	1.05428	1.03853	1.07003	-0.306275
540	40	0	Rabones Este	1.03794	1.01044	1.0117	1.08682	1.04576	1.07862	1.02256	1.11854	1.03434	1.0961	1.05428	1.03853	1.07003	-0.306275
541	40	0	Rabones Este	1.03794	1.01044	1.0117	1.08682	1.04576	1.07862	1.02256	1.11854	1.03434	1.0961	1.05428	1.03853	1.07003	-0.306275
542	40	0	Rabones Este	1.03794	1.01044	1.0117	1.08682	1.04576	1.07862	1.02256	1.11854	1.03434	1.0961	1.05428	1.03853	1.07003	-0.306275
543	25	0	Rabones Este	1.03794	1.01044	1.0117	1.08682	1.04576	1.07862	1.02256	1.11854	1.03434	1.0961	1.05428	1.03853	1.07003	-0.306275
544	60	0	Rabones Este	1.03794	1.01044	1.0117	1.08682	1.04576	1.07862	1.02256	1.11854	1.03434	1.0961	1.05428	1.03853	1.07003	-0.306275
545	80	0	Rabones Este	1.03794	1.01044	1.0117	1.08682	1.04576	1.07862	1.02256	1.11854	1.03434	1.0961	1.05428	1.03853	1.07003	-0.306275
546	40	0	Rabones Este	1.03794	1.01044	1.0117	1.08682	1.04576	1.07862	1.02256	1.11854	1.03434	1.0961	1.05428	1.03853	1.07003	-0.306275
547	100	1	Rabones Este	1.03794	1.01044	1.0117	1.08682	1.04576	1.07862	1.02256	1.11854	1.03434	1.0961	1.05428	1.03853	1.07003	-0.306275
548	20	1	Rabones Este	1.03794	1.01044	1.0117	1.08682	1.04576	1.07862	1.02256	1.11854	1.03434	1.0961	1.05428	1.03853	1.07003	-0.306275
549	30	0	Rabones Este	1.03794	1.01044	1.0117	1.08682	1.04576	1.07862	1.02256	1.11854	1.03434	1.0961	1.05428	1.03853	1.07003	-0.306275
550	30	0	Rabones Este	1.03794	1.01044	1.0117	1.08682	1.04576	1.07862	1.02256	1.11854	1.03434	1.0961	1.05428	1.03853	1.07003	-0.306275
551	25	0	Rabones Este	1.03794	1.01044	1.0117	1.08682	1.04576	1.07862	1.02256	1.11854	1.03434	1.0961	1.05428	1.03853	1.07003	-0.306275
552	30	0	Rabones Este	1.03794	1.01044	1.0117	1.08682	1.04576	1.07862	1.02256	1.11854	1.03434	1.0961	1.05428	1.03853	1.07003	-0.306275
553	30	0	Rabones Este	1.03794	1.01044	1.0117	1.08682	1.04576	1.07862	1.02256	1.11854	1.03434	1.0961	1.05428	1.03853	1.07003	-0.306275
554	30	0	Rabones Este	1.03794	1.01044	1.0117	1.08682	1.04576	1.07862	1.02256	1.11854	1.03434	1.0961	1.05428	1.03853	1.07003	-0.306275
555	30	0	Rabones Este	1.03794	1.01044	1.0117	1.08682	1.04576	1.07862	1.02256	1.11854	1.03434	1.0961	1.05428	1.03853	1.07003	-0.306275
556	30	0	Rabones Este	1.03794	1.01044	1.0117	1.08682	1.04576	1.07862	1.02256	1.11854	1.03434	1.0961	1.05428	1.03853	1.07003	-0.306275
557	35	0	Los Hualles	0.914885	1.01044	0.998167	0.876632	0.95775	0.930676	1.07888	1.04228	0.789985	1.01793	0.961762	0.951575	0.971949	-1.09517
558	20	0	Los Hualles	0.914885	1.01044	0.998167	0.876632	0.95775	0.930676	1.07888	1.04228	0.789985	1.01793	0.961762	0.951575	0.971949	-1.09517
559	20	0	Los Hualles	0.914885	1.01044	0.998167	0.876632	0.95775	0.930676	1.07888	1.04228	0.789985	1.01793	0.961762	0.951575	0.971949	-1.09517
560	20	0	Los Hualles	0.914885	1.01044	0.998167	0.876632	0.95775	0.930676	1.07888	1.04228	0.789985	1.01793	0.961762	0.951575	0.971949	-1.09517
561	80	0	Los Hualles	0.914885	1.01044	0.998167	0.876632	0.95775	0.930676	1.07888	1.04228	0.789985	1.01793	0.961762	0.951575	0.971949	-1.09517
562	30	0	Los Hualles	0.914885	1.01044	0.998167	0.876632	0.95775	0.930676	1.07888	1.04228	0.789985	1.01793	0.961762	0.951575	0.971949	-1.09517
563	20	0	Los Hualles	0.914885	1.01044	0.998167	0.876632	0.95775	0.930676	1.07888	1.04228	0.789985	1.01793	0.961762	0.951575	0.971949	-1.09517
564	7	0	Los Hualles	0.914885	1.01044	0.998167	0.876632	0.95775	0.930676	1.07888	1.04228	0.789985	1.01793	0.961762	0.951575	0.971949	-1.09517
565	10	0	Los Hualles	0.914885	1.01044	0.998167	0.876632	0.95775	0.930676	1.07888	1.04228	0.789985	1.01793	0.961762	0.951575	0.971949	-1.09517
566	15	0	Los Hualles	0.914885	1.01044	0.998167	0.876632	0.95775	0.930676	1.07888	1.04228	0.789985	1.01793	0.961762	0.951575	0.971949	-1.09517
567	70	0	Los Hualles	0.914885	1.01044	0.998167	0.876632	0.95775	0.930676	1.07888	1.04228	0.789985	1.01793	0.961762	0.951575	0.971949	-1.09517
568	65	0	Los Hualles	0.914885	1.01044	0.998167	0.876632	0.95775	0.930676	1.07888	1.04228	0.789985	1.01793	0.961762	0.951575	0.971949	-1.09517
569	50	0	Los Hualles	0.914885	1.01044	0.998167	0.876632	0.95775	0.930676	1.07888	1.04228	0.789985	1.01793	0.961762	0.951575	0.971949	-1.09517
570	50	0	Los Hualles	0.914885	1.01044	0.998167	0.876632	0.95775	0.930676	1.07888	1.04228	0.789985	1.01793	0.961762	0.951575	0.971949	-1.09517
571	50	0	Los Hualles	0.914885	1.01044	0.998167	0.876632	0.95775	0.930676	1.07888	1.04228	0.789985	1.01793	0.961762	0.951575	0.971949	-1.09517
572	70	1	Los Hualles	0.914885	1.01044	0.998167	0.876632	0.95775	0.930676	1.07888	1.04228	0.789985	1.01793	0.961762	0.951575	0.971949	-1.09517
573	40	0	Los Hualles	0.914885	1.01044	0.998167	0.876632	0.95775	0.930676	1.07888	1.04228	0.789985	1.01793	0.961762	0.951575	0.971949	-1.09517
574	30	0	Los Hualles	0.914885	1.01044	0.998167	0.876632	0.95775	0.930676	1.07888	1.04228	0.789985	1.01793	0.961762	0.951575	0.971949	-1.09517
575	30	0	Los Hualles	0.914885	1.01044	0.998167	0.876632	0.95775	0.930676	1.07888	1.04228	0.789985	1.01793	0.961762	0.951575	0.971949	-1.09517
576	40	0	Los Hualles	0.914885	1.01044	0.998167	0.876632	0.95775	0.930676	1.07888	1.04228	0.789985	1.01793	0.961762	0.951575	0.971949	-1.09517
577	130	0	Los Hualles	0.914885	1.01044	0.998167	0.876632	0.95775	0.930676	1.07888	1.04228	0.789985	1.01793	0.961762	0.951575	0.971949	-1.09517
578	40	0	Los Hualles	0.914885	1.01044	0.998167	0.876632	0.95775	0.930676	1.07888	1.04228	0.789985	1.01793	0.961762	0.951575	0.971949	-1.09517
579	50	1	Los Hualles	0.914885	1.01044	0.998167	0.876632	0.95775	0.930676	1.07888	1.04228	0.789985	1.01793	0.961762	0.951575	0.971949	-1.09517
580	30	0	Los Hualles	0.914885	1.01044	0.998167	0.876632	0.95775	0.930676	1.07888	1.04228	0.789985	1.01793	0.961762	0.951575	0.971949	-1.09517
581	35	0	Los Hualles	0.914885	1.01044	0.998167	0.876632	0.95775	0.930676	1.07888	1.04228	0.789985	1.01793	0.961762	0.951575	0.971949	-1.09517
582	20	0	Los Hualles	0.914885	1.01044	0.998167	0.876632	0.95775	0.930676	1.07888	1.04228	0.789985	1.01793	0.961762	0.951575	0.971949	-1.09517
583	40	0	Los Hualles	0.914885	1.01044	0.998167	0.876632	0.95775	0.930676	1.07888	1.04228	0.789985	1.01793	0.961762	0.951575	0.971949	-1.09517
584	60	0	Los Hualles	0.914885	1.01044	0.998167	0.876632	0.95775	0.930676	1.07888	1.04228	0.789985	1.01793	0.961762	0.951575	0.971949	-1.09517
585	15	0	Los Hualles	0.914885	1.01044	0.998167	0.876632	0.95775	0.930676	1.07888	1.04228	0.789985	1.01793	0.961762	0.951575	0.971949	-1.09517
586	30	0	Los Hualles	0.914885	1.01044	0.998167	0.876632	0.95775	0.930676	1.07888	1.04228	0.789985	1.01793	0.961762	0.951575	0.971949	-1.09517
587	20	0	Los Hualles	0.914885	1.01044	0.998167	0.876632	0.95775	0.930676	1.07888	1.04228	0.789985	1.01793	0.961762	0.951575	0.971949	-1.09517
588	40	0	Los Hualles	0.914885	1.01044	0.998167	0.876632	0.95775	0.930676	1.07888	1.04228	0.789985	1.01793	0.961762	0.951575	0.971949	-1.09517
589	30	0	Los Hualles	0.914885	1.01044	0.998167	0.876632	0.95775	0.930676	1.07888	1.04228	0.789985	1.01793	0.961762	0.951575	0.971949	-1.09517
590	65	0	Vado Azul	1.08074	1.02092	1.0117	0.977453	0.970692	1.04096	1.16688	1.17916	1.14583	1.10826	1.07026	1.0123	1.12822	-0.408367
591	60	0	Vado Azul	1.08074	1.02092	1.0117	0.977453	0.970692	1.04096	1.16688	1.17916	1.14583	1.10826	1.07026	1.0123	1.12822	-0.408367
592	97	0	Vado Azul	1.08074	1.02092	1.0117	0.977453	0.970692	1.04096	1.16688	1.17916	1.14583	1.10826	1.07026	1.0123	1.12822	-0.408367
593	70	0	Vado Azul	1.08074	1.02092	1.0117	0.977453	0.970692	1.04096	1.16688	1.17916	1.14583	1.10826	1.07026	1.0123	1.12822	-0.408367
594	30	0	Vado Azul	1.08074	1.02092	1.0117	0.977453	0.970692	1.04096	1.16688	1.17916	1.14583	1.10826	1.07026	1.0123	1.12822	-0.408367
595	130	1	Vado Azul	1.08074	1.02092	1.0117	0.977453	0.970692	1.04096	1.16688	1.17916	1.14583	1.10826	1.07026	1.0123	1.12822	-0.408367
596	170	1	Vado Azul	1.08074	1.02092	1.0117	0.977453	0.970692	1.04096	1.16688	1.17916	1.14583	1.10826	1.07026	1.0123	1.12822	-0.408367
597	210	1	Vado Azul	1.08074	1.02092	1.0117	0.977453	0.970692	1.04096	1.16688	1.17916	1.14583	1.10826	1.07026	1.0123	1.12822	-0.408367
598	60	0	Vado Azul	1.08074	1.02092	1.0117	0.977453	0.970692	1.04096	1.16688	1.17916	1.14583	1.10826	1.07026	1.0123	1.12822	-0.408367
599	100	0	Vado Azul	1.08074	1.02092	1.0117	0.977453	0.970692	1.04096	1.16688	1.17916	1.14583	1.10826	1.07026	1.0123	1.12822	-0.408367
600	130	0	Vado Azul	1.08074	1.02092	1.0117	0.977453	0.970692	1.04096	1.16688	1.17916	1.14583	1.10826	1.07026	1.0123	1.12822	-0.408367
601	70	0	Vado Azul	1.08074	1.02092	1.0117	0.977453	0.970692	1.04096	1.16688	1.17916	1.14583	1.10826	1.07026	1.0123	1.12822	-0.408367
602	95	0	Vado Azul	1.08074	1.02092	1.0117	0.977453	0.970692	1.04096	1.16688	1.17916	1.14583	1.10826	1.07026	1.0123	1.12822	-0.408367
603	40	0	Vado Azul	1.08074	1.02092	1.0117	0.977453	0.970692	1.04096	1.16688	1.17916	1.14583	1.10826	1.07026	1.0123	1.12822	-0.408367
604	110	0	Vado Azul	1.08074	1.02092	1.0117	0.977453	0.970692	1.04096	1.16688	1.17916	1.14583	1.10826	1.07026	1.0123	1.12822	-0.408367
605	18	0	Vado Azul	1.08074	1.02092	1.0117	0.977453	0.970692	1.04096	1.16688	1.17916	1.14583	1.10826	1.07026	1.0123	1.12822	-0.408367
606	100	0	Vado Azul	1.00851	1.01493	0.993657	0.76214	0.843855	0.755838	1.11408	0.729397	0.951304	0.964079	0.913779	0.924619	0.902939	-1.14157
607	25	0	Vado Azul	1.00851	1.01493	0.993657	0.76214	0.843855	0.755838	1.11408	0.729397	0.951304	0.964079	0.913779	0.924619	0.902939	-1.14157
608	35	0	Vado Azul	1.00851	1.01493	0.993657	0.76214	0.843855	0.755838	1.11408	0.729397	0.951304	0.964079	0.913779	0.924619	0.902939	-1.14157
609	100	0	Vado Azul	1.00851	1.01493	0.993657	0.76214	0.843855	0.755838	1.11408	0.729397	0.951304	0.964079	0.913779	0.924619	0.902939	-1.14157
610	60	1	Vado Azul	1.00851	1.01493	0.993657	0.76214	0.843855	0.755838	1.11408	0.729397	0.951304	0.964079	0.913779	0.924619	0.902939	-1.14157
611	45	0	Vado Azul	1.00851	1.01493	0.993657	0.76214	0.843855	0.755838	1.11408	0.729397	0.951304	0.964079	0.913779	0.924619	0.902939	-1.14157
612	55	0	Vado Azul	1.00851	1.01493	0.993657	0.76214	0.843855	0.755838	1.11408	0.729397	0.951304	0.964079	0.913779	0.924619	0.902939	-1.14157
613	15	0	Vado Azul	1.00851	1.01493	0.993657	0.76214	0.843855	0.755838	1.11408	0.729397	0.951304	0.964079	0.913779	0.924619	0.902939	-1.14157
614	120	0	Vado Azul	1.00851	1.01493	0.993657	0.76214	0.843855	0.755838	1.11408	0.729397	0.951304	0.964079	0.913779	0.924619	0.902939	-1.14157
615	40	0	Vado Azul	1.00851	1.01493	0.993657	0.76214	0.843855	0.755838	1.11408	0.729397	0.951304	0.964079	0.913779	0.924619	0.902939	-1.14157
616	40	0	Vado Azul	1.00851	1.01493	0.993657	0.76214	0.843855	0.755838	1.11408	0.729397	0.951304	0.964079	0.913779	0.924619	0.902939	-1.14157
617	75	1	Vado Azul	1.00851	1.01493	0.993657	0.76214	0.843855	0.755838	1.11408	0.729397	0.951304	0.964079	0.913779	0.924619	0.902939	-1.14157
618	80	1	Vado Azul	1.00851	1.01493	0.993657	0.76214	0.843855	0.755838	1.11408	0.729397	0.951304	0.964079	0.913779	0.924619	0.902939	-1.14157
619	120	0	Vado Azul	1.00851	1.01493	0.993657	0.76214	0.843855	0.755838	1.11408	0.729397	0.951304	0.964079	0.913779	0.924619	0.902939	-1.14157
620	30	0	Vado Azul	1.00851	1.01493	0.993657	0.76214	0.843855	0.755838	1.11408	0.729397	0.951304	0.964079	0.913779	0.924619	0.902939	-1.14157
621	100	0	Vado Azul	1.00851	1.01493	0.993657	0.76214	0.843855	0.755838	1.11408	0.729397	0.951304	0.964079	0.913779	0.924619	0.902939	-1.14157
622	25	0	Vado Azul	1.00851	1.01493	0.993657	0.76214	0.843855	0.755838	1.11408	0.729397	0.951304	0.964079	0.913779	0.924619	0.902939	-1.14157
623	110	0	Vado Azul	1.00851	1.01493	0.993657	0.76214	0.843855	0.755838	1.11408	0.729397	0.951304	0.964079	0.913779	0.924619	0.902939	-1.14157
624	40	0	Vado Azul	1.00851	1.01493	0.993657	0.76214	0.843855	0.755838	1.11408	0.729397	0.951304	0.964079	0.913779	0.924619	0.902939	-1.14157
625	60	0	Vado Azul	1.00851	1.01493	0.993657	0.76214	0.843855	0.755838	1.11408	0.729397	0.951304	0.964079	0.913779	0.924619	0.902939	-1.14157
626	60	0	Vado Azul	1.00851	1.01493	0.993657	0.76214	0.843855	0.755838	1.11408	0.729397	0.951304	0.964079	0.913779	0.924619	0.902939	-1.14157
627	60	0	Vado Azul	1.00851	1.01493	0.993657	0.76214	0.843855	0.755838	1.11408	0.729397	0.951304	0.964079	0.913779	0.924619	0.902939	-1.14157
628	60	0	Vado Azul	1.00851	1.01493	0.993657	0.76214	0.843855	0.755838	1.11408	0.729397	0.951304	0.964079	0.913779	0.924619	0.902939	-1.14157
629	120	1	Vado Azul	1.00851	1.01493	0.993657	0.76214	0.843855	0.755838	1.11408	0.729397	0.951304	0.964079	0.913779	0.924619	0.902939	-1.14157
630	15	0	Vado Azul	1.00851	1.01493	0.993657	0.76214	0.843855	0.755838	1.11408	0.729397	0.951304	0.964079	0.913779	0.924619	0.902939	-1.14157
631	30	0	Vado Azul	1.00851	1.01493	0.993657	0.76214	0.843855	0.755838	1.11408	0.729397	0.951304	0.964079	0.913779	0.924619	0.902939	-1.14157
632	100	0	Vado Azul	1.00851	1.01493	0.993657	0.76214	0.843855	0.755838	1.11408	0.729397	0.951304	0.964079	0.913779	0.924619	0.902939	-1.14157
633	60	0	Vado Azul	1.00851	1.01493	0.993657	0.76214	0.843855	0.755838	1.11408	0.729397	0.951304	0.964079	0.913779	0.924619	0.902939	-1.14157
634	50	0	Vado Azul	1.00851	1.01493	0.993657	0.76214	0.843855	0.755838	1.11408	0.729397	0.951304	0.964079	0.913779	0.924619	0.902939	-1.14157
635	30	0	Vado Azul	1.00851	1.01493	0.993657	0.76214	0.843855	0.755838	1.11408	0.729397	0.951304	0.964079	0.913779	0.924619	0.902939	-1.14157
636	23	0	Vado Azul	1.00851	1.01493	0.993657	0.76214	0.843855	0.755838	1.11408	0.729397	0.951304	0.964079	0.913779	0.924619	0.902939	-1.14157
637	60	0	Vado Azul	1.08074	1.02092	1.0117	0.977453	0.970692	1.04096	1.16688	1.17916	1.14583	1.10826	1.07026	1.0123	1.12822	-0.408367
638	60	1	Loma Larga Este	1.01119	0.984991	1.01019	0.953529	0.807616	0.922607	1.05072	0.813483	0.861155	1.05093	0.946642	0.953504	0.939779	-0.0556864
639	40	1	Loma Larga Este	1.01119	0.984991	1.01019	0.953529	0.807616	0.922607	1.05072	0.813483	0.861155	1.05093	0.946642	0.953504	0.939779	-0.0556864
640	40	1	Loma Larga Este	1.01119	0.984991	1.01019	0.953529	0.807616	0.922607	1.05072	0.813483	0.861155	1.05093	0.946642	0.953504	0.939779	-0.0556864
641	40	0	Loma Larga Este	1.01119	0.984991	1.01019	0.953529	0.807616	0.922607	1.05072	0.813483	0.861155	1.05093	0.946642	0.953504	0.939779	-0.0556864
642	70	1	Loma Larga Este	1.01119	0.984991	1.01019	0.953529	0.807616	0.922607	1.05072	0.813483	0.861155	1.05093	0.946642	0.953504	0.939779	-0.0556864
643	40	1	Loma Larga Este	1.01119	0.984991	1.01019	0.953529	0.807616	0.922607	1.05072	0.813483	0.861155	1.05093	0.946642	0.953504	0.939779	-0.0556864
644	90	1	Loma Larga Este	1.01119	0.984991	1.01019	0.953529	0.807616	0.922607	1.05072	0.813483	0.861155	1.05093	0.946642	0.953504	0.939779	-0.0556864
645	50	1	Loma Larga Este	1.01119	0.984991	1.01019	0.953529	0.807616	0.922607	1.05072	0.813483	0.861155	1.05093	0.946642	0.953504	0.939779	-0.0556864
646	35	1	Loma Larga Este	1.01119	0.984991	1.01019	0.953529	0.807616	0.922607	1.05072	0.813483	0.861155	1.05093	0.946642	0.953504	0.939779	-0.0556864
647	25	0	Loma Larga Este	1.01119	0.984991	1.01019	0.953529	0.807616	0.922607	1.05072	0.813483	0.861155	1.05093	0.946642	0.953504	0.939779	-0.0556864
648	50	1	Loma Larga Este	1.01119	0.984991	1.01019	0.953529	0.807616	0.922607	1.05072	0.813483	0.861155	1.05093	0.946642	0.953504	0.939779	-0.0556864
649	160	0	Loma Larga Este	1.01119	0.984991	1.01019	0.953529	0.807616	0.922607	1.05072	0.813483	0.861155	1.05093	0.946642	0.953504	0.939779	-0.0556864
650	120	1	Loma Larga Este	1.01119	0.984991	1.01019	0.953529	0.807616	0.922607	1.05072	0.813483	0.861155	1.05093	0.946642	0.953504	0.939779	-0.0556864
651	80	1	Loma Larga Este	1.01119	0.984991	1.01019	0.953529	0.807616	0.922607	1.05072	0.813483	0.861155	1.05093	0.946642	0.953504	0.939779	-0.0556864
652	50	1	Loma Larga Este	1.01119	0.984991	1.01019	0.953529	0.807616	0.922607	1.05072	0.813483	0.861155	1.05093	0.946642	0.953504	0.939779	-0.0556864
653	40	1	Loma Larga Este	1.01119	0.984991	1.01019	0.953529	0.807616	0.922607	1.05072	0.813483	0.861155	1.05093	0.946642	0.953504	0.939779	-0.0556864
654	80	1	Loma Larga Este	1.01119	0.984991	1.01019	0.953529	0.807616	0.922607	1.05072	0.813483	0.861155	1.05093	0.946642	0.953504	0.939779	-0.0556864
655	30	1	Loma Larga Este	1.01119	0.984991	1.01019	0.953529	0.807616	0.922607	1.05072	0.813483	0.861155	1.05093	0.946642	0.953504	0.939779	-0.0556864
656	30	1	Loma Larga Este	1.01119	0.984991	1.01019	0.953529	0.807616	0.922607	1.05072	0.813483	0.861155	1.05093	0.946642	0.953504	0.939779	-0.0556864
657	50	0	Loma Larga Este	1.01119	0.984991	1.01019	0.953529	0.807616	0.922607	1.05072	0.813483	0.861155	1.05093	0.946642	0.953504	0.939779	-0.0556864
658	60	1	Loma Larga Este	1.01119	0.984991	1.01019	0.953529	0.807616	0.922607	1.05072	0.813483	0.861155	1.05093	0.946642	0.953504	0.939779	-0.0556864
659	80	1	Loma Larga Este	1.01119	0.984991	1.01019	0.953529	0.807616	0.922607	1.05072	0.813483	0.861155	1.05093	0.946642	0.953504	0.939779	-0.0556864
660	80	1	Loma Larga Este	1.01119	0.984991	1.01019	0.953529	0.807616	0.922607	1.05072	0.813483	0.861155	1.05093	0.946642	0.953504	0.939779	-0.0556864
661	50	1	Loma Larga Este	1.01119	0.984991	1.01019	0.953529	0.807616	0.922607	1.05072	0.813483	0.861155	1.05093	0.946642	0.953504	0.939779	-0.0556864
662	90	1	Loma Larga Este	1.01119	0.984991	1.01019	0.953529	0.807616	0.922607	1.05072	0.813483	0.861155	1.05093	0.946642	0.953504	0.939779	-0.0556864
663	40	1	Loma Larga Este	1.01119	0.984991	1.01019	0.953529	0.807616	0.922607	1.05072	0.813483	0.861155	1.05093	0.946642	0.953504	0.939779	-0.0556864
664	60	1	Loma Larga Este	1.01119	0.984991	1.01019	0.953529	0.807616	0.922607	1.05072	0.813483	0.861155	1.05093	0.946642	0.953504	0.939779	-0.0556864
665	70	1	Loma Larga Este	1.01119	0.984991	1.01019	0.953529	0.807616	0.922607	1.05072	0.813483	0.861155	1.05093	0.946642	0.953504	0.939779	-0.0556864
666	90	1	Loma Larga Este	1.01119	0.984991	1.01019	0.953529	0.807616	0.922607	1.05072	0.813483	0.861155	1.05093	0.946642	0.953504	0.939779	-0.0556864
667	120	1	Loma Larga Este	1.01119	0.984991	1.01019	0.953529	0.807616	0.922607	1.05072	0.813483	0.861155	1.05093	0.946642	0.953504	0.939779	-0.0556864
668	80	1	Loma Larga Este	1.01119	0.984991	1.01019	0.953529	0.807616	0.922607	1.05072	0.813483	0.861155	1.05093	0.946642	0.953504	0.939779	-0.0556864
669	80	1	Loma Larga Este	1.01119	0.984991	1.01019	0.953529	0.807616	0.922607	1.05072	0.813483	0.861155	1.05093	0.946642	0.953504	0.939779	-0.0556864
670	120	1	Loma Larga Este	1.01119	0.984991	1.01019	0.953529	0.807616	0.922607	1.05072	0.813483	0.861155	1.05093	0.946642	0.953504	0.939779	-0.0556864
671	60	0	Loma Larga Este	1.01119	0.984991	1.01019	0.953529	0.807616	0.922607	1.05072	0.813483	0.861155	1.05093	0.946642	0.953504	0.939779	-0.0556864
672	80	1	Loma Larga Este	1.01119	0.984991	1.01019	0.953529	0.807616	0.922607	1.05072	0.813483	0.861155	1.05093	0.946642	0.953504	0.939779	-0.0556864
673	90	1	Loma Larga Este	1.01119	0.984991	1.01019	0.953529	0.807616	0.922607	1.05072	0.813483	0.861155	1.05093	0.946642	0.953504	0.939779	-0.0556864
674	60	1	Loma Larga Este	1.01119	0.984991	1.01019	0.953529	0.807616	0.922607	1.05072	0.813483	0.861155	1.05093	0.946642	0.953504	0.939779	-0.0556864
675	110	1	Loma Larga Este	1.01119	0.984991	1.01019	0.953529	0.807616	0.922607	1.05072	0.813483	0.861155	1.05093	0.946642	0.953504	0.939779	-0.0556864
676	160	1	Picazo Norte	0.904184	0.97601	0.986141	1.10562	1.04058	1.05172	0.799039	0.997299	0.977399	0.931075	0.976906	1.00251	0.951306	-1.16013
677	11	0	Picazo Norte	0.904184	0.97601	0.986141	1.10562	1.04058	1.05172	0.799039	0.997299	0.977399	0.931075	0.976906	1.00251	0.951306	-1.16013
678	13	0	Picazo Norte	0.904184	0.97601	0.986141	1.10562	1.04058	1.05172	0.799039	0.997299	0.977399	0.931075	0.976906	1.00251	0.951306	-1.16013
679	80	0	Picazo Norte	0.904184	0.97601	0.986141	1.10562	1.04058	1.05172	0.799039	0.997299	0.977399	0.931075	0.976906	1.00251	0.951306	-1.16013
680	30	0	Picazo Norte	0.904184	0.97601	0.986141	1.10562	1.04058	1.05172	0.799039	0.997299	0.977399	0.931075	0.976906	1.00251	0.951306	-1.16013
681	25	0	Picazo Norte	0.904184	0.97601	0.986141	1.10562	1.04058	1.05172	0.799039	0.997299	0.977399	0.931075	0.976906	1.00251	0.951306	-1.16013
682	50	0	Picazo Norte	0.904184	0.97601	0.986141	1.10562	1.04058	1.05172	0.799039	0.997299	0.977399	0.931075	0.976906	1.00251	0.951306	-1.16013
683	35	0	Picazo Norte	0.904184	0.97601	0.986141	1.10562	1.04058	1.05172	0.799039	0.997299	0.977399	0.931075	0.976906	1.00251	0.951306	-1.16013
684	17	0	Picazo Norte	0.904184	0.97601	0.986141	1.10562	1.04058	1.05172	0.799039	0.997299	0.977399	0.931075	0.976906	1.00251	0.951306	-1.16013
685	50	0	Picazo Norte	0.904184	0.97601	0.986141	1.10562	1.04058	1.05172	0.799039	0.997299	0.977399	0.931075	0.976906	1.00251	0.951306	-1.16013
686	37	0	Picazo Norte	0.904184	0.97601	0.986141	1.10562	1.04058	1.05172	0.799039	0.997299	0.977399	0.931075	0.976906	1.00251	0.951306	-1.16013
687	110	1	Picazo Centro	0.898834	0.970022	0.990651	1.08853	1.04576	1.05172	0.777919	0.930813	0.972655	0.899807	0.962671	0.998759	0.926582	-1.87478
688	70	1	Picazo Centro	0.898834	0.970022	0.990651	1.08853	1.04576	1.05172	0.777919	0.930813	0.972655	0.899807	0.962671	0.998759	0.926582	-1.87478
689	50	1	Picazo Centro	0.898834	0.970022	0.990651	1.08853	1.04576	1.05172	0.777919	0.930813	0.972655	0.899807	0.962671	0.998759	0.926582	-1.87478
690	60	1	Picazo Centro	0.898834	0.970022	0.990651	1.08853	1.04576	1.05172	0.777919	0.930813	0.972655	0.899807	0.962671	0.998759	0.926582	-1.87478
691	40	1	Picazo Centro	0.898834	0.970022	0.990651	1.08853	1.04576	1.05172	0.777919	0.930813	0.972655	0.899807	0.962671	0.998759	0.926582	-1.87478
692	80	1	Picazo Centro	0.898834	0.970022	0.990651	1.08853	1.04576	1.05172	0.777919	0.930813	0.972655	0.899807	0.962671	0.998759	0.926582	-1.87478
693	110	1	Picazo Centro	0.898834	0.970022	0.990651	1.08853	1.04576	1.05172	0.777919	0.930813	0.972655	0.899807	0.962671	0.998759	0.926582	-1.87478
694	30	0	Picazo Centro	0.898834	0.970022	0.990651	1.08853	1.04576	1.05172	0.777919	0.930813	0.972655	0.899807	0.962671	0.998759	0.926582	-1.87478
695	10	0	Picazo Centro	0.898834	0.970022	0.990651	1.08853	1.04576	1.05172	0.777919	0.930813	0.972655	0.899807	0.962671	0.998759	0.926582	-1.87478
696	15	0	Picazo Centro	0.898834	0.970022	0.990651	1.08853	1.04576	1.05172	0.777919	0.930813	0.972655	0.899807	0.962671	0.998759	0.926582	-1.87478
697	30	0	Picazo Centro	0.898834	0.970022	0.990651	1.08853	1.04576	1.05172	0.777919	0.930813	0.972655	0.899807	0.962671	0.998759	0.926582	-1.87478
698	30	0	Picazo Centro	0.898834	0.970022	0.990651	1.08853	1.04576	1.05172	0.777919	0.930813	0.972655	0.899807	0.962671	0.998759	0.926582	-1.87478
699	70	1	Picazo Centro	0.898834	0.970022	0.990651	1.08853	1.04576	1.05172	0.777919	0.930813	0.972655	0.899807	0.962671	0.998759	0.926582	-1.87478
700	40	1	Picazo Centro	0.898834	0.970022	0.990651	1.08853	1.04576	1.05172	0.777919	0.930813	0.972655	0.899807	0.962671	0.998759	0.926582	-1.87478
701	40	1	Picazo Centro	0.898834	0.970022	0.990651	1.08853	1.04576	1.05172	0.777919	0.930813	0.972655	0.899807	0.962671	0.998759	0.926582	-1.87478
702	15	0	Picazo Centro	0.898834	0.970022	0.990651	1.08853	1.04576	1.05172	0.777919	0.930813	0.972655	0.899807	0.962671	0.998759	0.926582	-1.87478
703	45	1	Picazo Centro	0.898834	0.970022	0.990651	1.08853	1.04576	1.05172	0.777919	0.930813	0.972655	0.899807	0.962671	0.998759	0.926582	-1.87478
704	48	0	Picazo Centro	0.898834	0.970022	0.990651	1.08853	1.04576	1.05172	0.777919	0.930813	0.972655	0.899807	0.962671	0.998759	0.926582	-1.87478
705	50	0	Picazo Centro	0.898834	0.970022	0.990651	1.08853	1.04576	1.05172	0.777919	0.930813	0.972655	0.899807	0.962671	0.998759	0.926582	-1.87478
706	80	1	Picazo Centro	0.898834	0.970022	0.990651	1.08853	1.04576	1.05172	0.777919	0.930813	0.972655	0.899807	0.962671	0.998759	0.926582	-1.87478
707	30	0	Picazo Centro	0.898834	0.970022	0.990651	1.08853	1.04576	1.05172	0.777919	0.930813	0.972655	0.899807	0.962671	0.998759	0.926582	-1.87478
708	110	1	Picazo Centro	0.898834	0.970022	0.990651	1.08853	1.04576	1.05172	0.777919	0.930813	0.972655	0.899807	0.962671	0.998759	0.926582	-1.87478
709	15	0	Picazo Centro	0.898834	0.970022	0.990651	1.08853	1.04576	1.05172	0.777919	0.930813	0.972655	0.899807	0.962671	0.998759	0.926582	-1.87478
710	15	0	Picazo Centro	0.898834	0.970022	0.990651	1.08853	1.04576	1.05172	0.777919	0.930813	0.972655	0.899807	0.962671	0.998759	0.926582	-1.87478
711	140	1	Picazo Centro	0.898834	0.970022	0.990651	1.08853	1.04576	1.05172	0.777919	0.930813	0.972655	0.899807	0.962671	0.998759	0.926582	-1.87478
712	40	0	Picazo Centro	0.898834	0.970022	0.990651	1.08853	1.04576	1.05172	0.777919	0.930813	0.972655	0.899807	0.962671	0.998759	0.926582	-1.87478
713	15	0	Picazo Centro	0.898834	0.970022	0.990651	1.08853	1.04576	1.05172	0.777919	0.930813	0.972655	0.899807	0.962671	0.998759	0.926582	-1.87478
714	25	0	Picazo Centro	0.898834	0.970022	0.990651	1.08853	1.04576	1.05172	0.777919	0.930813	0.972655	0.899807	0.962671	0.998759	0.926582	-1.87478
715	20	0	Picazo Centro	0.898834	0.970022	0.990651	1.08853	1.04576	1.05172	0.777919	0.930813	0.972655	0.899807	0.962671	0.998759	0.926582	-1.87478
716	140	1	Picazo Centro	0.898834	0.970022	0.990651	1.08853	1.04576	1.05172	0.777919	0.930813	0.972655	0.899807	0.962671	0.998759	0.926582	-1.87478
717	130	1	Picazo Centro	0.898834	0.970022	0.990651	1.08853	1.04576	1.05172	0.777919	0.930813	0.972655	0.899807	0.962671	0.998759	0.926582	-1.87478
718	70	1	Picazo Centro	0.898834	0.970022	0.990651	1.08853	1.04576	1.05172	0.777919	0.930813	0.972655	0.899807	0.962671	0.998759	0.926582	-1.87478
719	90	1	Picazo Centro	0.898834	0.970022	0.990651	1.08853	1.04576	1.05172	0.777919	0.930813	0.972655	0.899807	0.962671	0.998759	0.926582	-1.87478
720	60	1	Picazo Centro	0.898834	0.970022	0.990651	1.08853	1.04576	1.05172	0.777919	0.930813	0.972655	0.899807	0.962671	0.998759	0.926582	-1.87478
721	98	1	Picazo Centro	0.898834	0.970022	0.990651	1.08853	1.04576	1.05172	0.777919	0.930813	0.972655	0.899807	0.962671	0.998759	0.926582	-1.87478
722	120	1	Picazo Centro	0.898834	0.970022	0.990651	1.08853	1.04576	1.05172	0.777919	0.930813	0.972655	0.899807	0.962671	0.998759	0.926582	-1.87478
723	75	0	Picazo Centro	0.898834	0.970022	0.990651	1.08853	1.04576	1.05172	0.777919	0.930813	0.972655	0.899807	0.962671	0.998759	0.926582	-1.87478
724	45	0	Picazo Centro	0.898834	0.970022	0.990651	1.08853	1.04576	1.05172	0.777919	0.930813	0.972655	0.899807	0.962671	0.998759	0.926582	-1.87478
725	120	1	Picazo Centro	0.898834	0.970022	0.990651	1.08853	1.04576	1.05172	0.777919	0.930813	0.972655	0.899807	0.962671	0.998759	0.926582	-1.87478
726	90	1	Picazo Centro	0.898834	0.970022	0.990651	1.08853	1.04576	1.05172	0.777919	0.930813	0.972655	0.899807	0.962671	0.998759	0.926582	-1.87478
727	90	1	Picazo Centro	0.898834	0.970022	0.990651	1.08853	1.04576	1.05172	0.777919	0.930813	0.972655	0.899807	0.962671	0.998759	0.926582	-1.87478
728	90	1	Picazo Centro	0.898834	0.970022	0.990651	1.08853	1.04576	1.05172	0.777919	0.930813	0.972655	0.899807	0.962671	0.998759	0.926582	-1.87478
729	90	1	Picazo Centro	0.898834	0.970022	0.990651	1.08853	1.04576	1.05172	0.777919	0.930813	0.972655	0.899807	0.962671	0.998759	0.926582	-1.87478
730	70	1	Picazo Centro	0.898834	0.970022	0.990651	1.08853	1.04576	1.05172	0.777919	0.930813	0.972655	0.899807	0.962671	0.998759	0.926582	-1.87478
731	90	1	Picazo Centro	0.898834	0.970022	0.990651	1.08853	1.04576	1.05172	0.777919	0.930813	0.972655	0.899807	0.962671	0.998759	0.926582	-1.87478
732	45	0	Picazo Centro	0.898834	0.970022	0.990651	1.08853	1.04576	1.05172	0.777919	0.930813	0.972655	0.899807	0.962671	0.998759	0.926582	-1.87478
733	50	0	Picazo Centro	0.898834	0.970022	0.990651	1.08853	1.04576	1.05172	0.777919	0.930813	0.972655	0.899807	0.962671	0.998759	0.926582	-1.87478
734	80	1	Picazo Centro	0.898834	0.970022	0.990651	1.08853	1.04576	1.05172	0.777919	0.930813	0.972655	0.899807	0.962671	0.998759	0.926582	-1.87478
735	15	0	Picazo Centro	0.898834	0.970022	0.990651	1.08853	1.04576	1.05172	0.777919	0.930813	0.972655	0.899807	0.962671	0.998759	0.926582	-1.87478
736	60	0	Picazo Centro	0.898834	0.970022	0.990651	1.08853	1.04576	1.05172	0.777919	0.930813	0.972655	0.899807	0.962671	0.998759	0.926582	-1.87478
737	60	1	Picazo Centro	0.898834	0.970022	0.990651	1.08853	1.04576	1.05172	0.777919	0.930813	0.972655	0.899807	0.962671	0.998759	0.926582	-1.87478
738	60	1	Picazo Centro	0.898834	0.970022	0.990651	1.08853	1.04576	1.05172	0.777919	0.930813	0.972655	0.899807	0.962671	0.998759	0.926582	-1.87478
739	110	1	Picazo Centro	0.898834	0.970022	0.990651	1.08853	1.04576	1.05172	0.777919	0.930813	0.972655	0.899807	0.962671	0.998759	0.926582	-1.87478
740	130	1	Picazo Centro	0.898834	0.970022	0.990651	1.08853	1.04576	1.05172	0.777919	0.930813	0.972655	0.899807	0.962671	0.998759	0.926582	-1.87478
741	80	1	Picazo Centro	0.898834	0.970022	0.990651	1.08853	1.04576	1.05172	0.777919	0.930813	0.972655	0.899807	0.962671	0.998759	0.926582	-1.87478
742	55	1	Picazo Centro	0.898834	0.970022	0.990651	1.08853	1.04576	1.05172	0.777919	0.930813	0.972655	0.899807	0.962671	0.998759	0.926582	-1.87478
743	140	1	Picazo Centro	0.898834	0.970022	0.990651	1.08853	1.04576	1.05172	0.777919	0.930813	0.972655	0.899807	0.962671	0.998759	0.926582	-1.87478
744	35	0	Picazo Centro	0.898834	0.970022	0.990651	1.08853	1.04576	1.05172	0.777919	0.930813	0.972655	0.899807	0.962671	0.998759	0.926582	-1.87478
745	40	0	Picazo Centro	0.898834	0.970022	0.990651	1.08853	1.04576	1.05172	0.777919	0.930813	0.972655	0.899807	0.962671	0.998759	0.926582	-1.87478
746	130	0	Picazo Centro	0.898834	0.970022	0.990651	1.08853	1.04576	1.05172	0.777919	0.930813	0.972655	0.899807	0.962671	0.998759	0.926582	-1.87478
747	50	0	Picazo Centro	0.898834	0.970022	0.990651	1.08853	1.04576	1.05172	0.777919	0.930813	0.972655	0.899807	0.962671	0.998759	0.926582	-1.87478
748	170	1	Picazo Centro	0.898834	0.970022	0.990651	1.08853	1.04576	1.05172	0.777919	0.930813	0.972655	0.899807	0.962671	0.998759	0.926582	-1.87478
749	50	0	Picazo Centro	0.898834	0.970022	0.990651	1.08853	1.04576	1.05172	0.777919	0.930813	0.972655	0.899807	0.962671	0.998759	0.926582	-1.87478
750	210	1	Picazo Centro	0.898834	0.970022	0.990651	1.08853	1.04576	1.05172	0.777919	0.930813	0.972655	0.899807	0.962671	0.998759	0.926582	-1.87478
751	150	1	Picazo Centro	0.898834	0.970022	0.990651	1.08853	1.04576	1.05172	0.777919	0.930813	0.972655	0.899807	0.962671	0.998759	0.926582	-1.87478
752	30	0	Picazo Centro	0.898834	0.970022	0.990651	1.08853	1.04576	1.05172	0.777919	0.930813	0.972655	0.899807	0.962671	0.998759	0.926582	-1.87478
753	10	0	Picazo Centro	0.898834	0.970022	0.990651	1.08853	1.04576	1.05172	0.777919	0.930813	0.972655	0.899807	0.962671	0.998759	0.926582	-1.87478
754	30	0	Picazo Centro	0.898834	0.970022	0.990651	1.08853	1.04576	1.05172	0.777919	0.930813	0.972655	0.899807	0.962671	0.998759	0.926582	-1.87478
755	84	0	Picazo Centro	0.898834	0.970022	0.990651	1.08853	1.04576	1.05172	0.777919	0.930813	0.972655	0.899807	0.962671	0.998759	0.926582	-1.87478
756	100	0	Picazo Centro	0.898834	0.970022	0.990651	1.08853	1.04576	1.05172	0.777919	0.930813	0.972655	0.899807	0.962671	0.998759	0.926582	-1.87478
757	80	0	Picazo Centro	0.898834	0.970022	0.990651	1.08853	1.04576	1.05172	0.777919	0.930813	0.972655	0.899807	0.962671	0.998759	0.926582	-1.87478
758	50	0	Picazo Centro	0.898834	0.970022	0.990651	1.08853	1.04576	1.05172	0.777919	0.930813	0.972655	0.899807	0.962671	0.998759	0.926582	-1.87478
759	80	0	Picazo Centro	0.898834	0.970022	0.990651	1.08853	1.04576	1.05172	0.777919	0.930813	0.972655	0.899807	0.962671	0.998759	0.926582	-1.87478
760	70	1	Picazo Centro	0.898834	0.970022	0.990651	1.08853	1.04576	1.05172	0.777919	0.930813	0.972655	0.899807	0.962671	0.998759	0.926582	-1.87478
761	110	1	Picazo Centro	0.898834	0.970022	0.990651	1.08853	1.04576	1.05172	0.777919	0.930813	0.972655	0.899807	0.962671	0.998759	0.926582	-1.87478
762	65	0	Picazo Centro	0.898834	0.970022	0.990651	1.08853	1.04576	1.05172	0.777919	0.930813	0.972655	0.899807	0.962671	0.998759	0.926582	-1.87478
763	30	0	Picazo Centro	0.898834	0.970022	0.990651	1.08853	1.04576	1.05172	0.777919	0.930813	0.972655	0.899807	0.962671	0.998759	0.926582	-1.87478
764	130	1	Picazo Centro	0.898834	0.970022	0.990651	1.08853	1.04576	1.05172	0.777919	0.930813	0.972655	0.899807	0.962671	0.998759	0.926582	-1.87478
765	120	1	Picazo Centro	0.898834	0.970022	0.990651	1.08853	1.04576	1.05172	0.777919	0.930813	0.972655	0.899807	0.962671	0.998759	0.926582	-1.87478
766	140	1	Picazo Centro	0.898834	0.970022	0.990651	1.08853	1.04576	1.05172	0.777919	0.930813	0.972655	0.899807	0.962671	0.998759	0.926582	-1.87478
767	140	1	Picazo Centro	0.898834	0.970022	0.990651	1.08853	1.04576	1.05172	0.777919	0.930813	0.972655	0.899807	0.962671	0.998759	0.926582	-1.87478
768	140	1	Picazo Centro	0.898834	0.970022	0.990651	1.08853	1.04576	1.05172	0.777919	0.930813	0.972655	0.899807	0.962671	0.998759	0.926582	-1.87478
769	140	1	Picazo Centro	0.898834	0.970022	0.990651	1.08853	1.04576	1.05172	0.777919	0.930813	0.972655	0.899807	0.962671	0.998759	0.926582	-1.87478
770	140	1	Picazo Centro	0.898834	0.970022	0.990651	1.08853	1.04576	1.05172	0.777919	0.930813	0.972655	0.899807	0.962671	0.998759	0.926582	-1.87478
771	110	1	Picazo Centro	0.898834	0.970022	0.990651	1.08853	1.04576	1.05172	0.777919	0.930813	0.972655	0.899807	0.962671	0.998759	0.926582	-1.87478
772	90	1	Picazo Centro	0.898834	0.970022	0.990651	1.08853	1.04576	1.05172	0.777919	0.930813	0.972655	0.899807	0.962671	0.998759	0.926582	-1.87478
773	235	1	Picazo Centro	0.898834	0.970022	0.990651	1.08853	1.04576	1.05172	0.777919	0.930813	0.972655	0.899807	0.962671	0.998759	0.926582	-1.87478
774	120	1	Picazo Centro	0.898834	0.970022	0.990651	1.08853	1.04576	1.05172	0.777919	0.930813	0.972655	0.899807	0.962671	0.998759	0.926582	-1.87478
775	80	1	Picazo Centro	0.898834	0.970022	0.990651	1.08853	1.04576	1.05172	0.777919	0.930813	0.972655	0.899807	0.962671	0.998759	0.926582	-1.87478
776	90	1	Picazo Centro	0.898834	0.970022	0.990651	1.08853	1.04576	1.05172	0.777919	0.930813	0.972655	0.899807	0.962671	0.998759	0.926582	-1.87478
777	90	1	Picazo Centro	0.898834	0.970022	0.990651	1.08853	1.04576	1.05172	0.777919	0.930813	0.972655	0.899807	0.962671	0.998759	0.926582	-1.87478
778	110	1	Picazo Centro	0.898834	0.970022	0.990651	1.08853	1.04576	1.05172	0.777919	0.930813	0.972655	0.899807	0.962671	0.998759	0.926582	-1.87478
779	60	0	Picazo Centro	0.898834	0.970022	0.990651	1.08853	1.04576	1.05172	0.777919	0.930813	0.972655	0.899807	0.962671	0.998759	0.926582	-1.87478
780	90	0	Picazo Centro	0.898834	0.970022	0.990651	1.08853	1.04576	1.05172	0.777919	0.930813	0.972655	0.899807	0.962671	0.998759	0.926582	-1.87478
781	110	1	Picazo Centro	0.898834	0.970022	0.990651	1.08853	1.04576	1.05172	0.777919	0.930813	0.972655	0.899807	0.962671	0.998759	0.926582	-1.87478
782	120	1	Picazo Centro	0.898834	0.970022	0.990651	1.08853	1.04576	1.05172	0.777919	0.930813	0.972655	0.899807	0.962671	0.998759	0.926582	-1.87478
783	80	1	Picazo Centro	0.898834	0.970022	0.990651	1.08853	1.04576	1.05172	0.777919	0.930813	0.972655	0.899807	0.962671	0.998759	0.926582	-1.87478
784	50	0	Picazo Centro	0.898834	0.970022	0.990651	1.08853	1.04576	1.05172	0.777919	0.930813	0.972655	0.899807	0.962671	0.998759	0.926582	-1.87478
785	40	0	Picazo Centro	0.898834	0.970022	0.990651	1.08853	1.04576	1.05172	0.777919	0.930813	0.972655	0.899807	0.962671	0.998759	0.926582	-1.87478
786	80	1	Picazo Centro	0.898834	0.970022	0.990651	1.08853	1.04576	1.05172	0.777919	0.930813	0.972655	0.899807	0.962671	0.998759	0.926582	-1.87478
787	40	0	Picazo Centro	0.898834	0.970022	0.990651	1.08853	1.04576	1.05172	0.777919	0.930813	0.972655	0.899807	0.962671	0.998759	0.926582	-1.87478
788	150	1	Picazo Centro	0.898834	0.970022	0.990651	1.08853	1.04576	1.05172	0.777919	0.930813	0.972655	0.899807	0.962671	0.998759	0.926582	-1.87478
789	90	1	Picazo Centro	0.898834	0.970022	0.990651	1.08853	1.04576	1.05172	0.777919	0.930813	0.972655	0.899807	0.962671	0.998759	0.926582	-1.87478
790	70	0	Picazo Centro	0.898834	0.970022	0.990651	1.08853	1.04576	1.05172	0.777919	0.930813	0.972655	0.899807	0.962671	0.998759	0.926582	-1.87478
791	110	1	Picazo Centro	0.898834	0.970022	0.990651	1.08853	1.04576	1.05172	0.777919	0.930813	0.972655	0.899807	0.962671	0.998759	0.926582	-1.87478
792	90	1	Picazo Centro	0.898834	0.970022	0.990651	1.08853	1.04576	1.05172	0.777919	0.930813	0.972655	0.899807	0.962671	0.998759	0.926582	-1.87478
793	50	0	Picazo Centro	0.898834	0.970022	0.990651	1.08853	1.04576	1.05172	0.777919	0.930813	0.972655	0.899807	0.962671	0.998759	0.926582	-1.87478
794	110	1	Picazo Centro	0.898834	0.970022	0.990651	1.08853	1.04576	1.05172	0.777919	0.930813	0.972655	0.899807	0.962671	0.998759	0.926582	-1.87478
795	50	0	Picazo Centro	0.898834	0.970022	0.990651	1.08853	1.04576	1.05172	0.777919	0.930813	0.972655	0.899807	0.962671	0.998759	0.926582	-1.87478
796	50	1	Picazo Centro	0.898834	0.970022	0.990651	1.08853	1.04576	1.05172	0.777919	0.930813	0.972655	0.899807	0.962671	0.998759	0.926582	-1.87478
797	120	1	Picazo Centro	0.898834	0.970022	0.990651	1.08853	1.04576	1.05172	0.777919	0.930813	0.972655	0.899807	0.962671	0.998759	0.926582	-1.87478
798	50	0	Picazo Centro	0.898834	0.970022	0.990651	1.08853	1.04576	1.05172	0.777919	0.930813	0.972655	0.899807	0.962671	0.998759	0.926582	-1.87478
799	40	0	Picazo Centro	0.898834	0.970022	0.990651	1.08853	1.04576	1.05172	0.777919	0.930813	0.972655	0.899807	0.962671	0.998759	0.926582	-1.87478
800	70	0	Picazo Centro	0.898834	0.970022	0.990651	1.08853	1.04576	1.05172	0.777919	0.930813	0.972655	0.899807	0.962671	0.998759	0.926582	-1.87478
801	90	0	Picazo Centro	0.898834	0.970022	0.990651	1.08853	1.04576	1.05172	0.777919	0.930813	0.972655	0.899807	0.962671	0.998759	0.926582	-1.87478
802	60	0	Picazo Centro	0.898834	0.970022	0.990651	1.08853	1.04576	1.05172	0.777919	0.930813	0.972655	0.899807	0.962671	0.998759	0.926582	-1.87478
803	150	1	Picazo Centro	0.898834	0.970022	0.990651	1.08853	1.04576	1.05172	0.777919	0.930813	0.972655	0.899807	0.962671	0.998759	0.926582	-1.87478
804	25	0	Picazo Centro	0.898834	0.970022	0.990651	1.08853	1.04576	1.05172	0.777919	0.930813	0.972655	0.899807	0.962671	0.998759	0.926582	-1.87478
805	10	0	Picazo Centro	0.898834	0.970022	0.990651	1.08853	1.04576	1.05172	0.777919	0.930813	0.972655	0.899807	0.962671	0.998759	0.926582	-1.87478
806	120	1	Picazo Centro	0.898834	0.970022	0.990651	1.08853	1.04576	1.05172	0.777919	0.930813	0.972655	0.899807	0.962671	0.998759	0.926582	-1.87478
807	90	1	Picazo Centro	0.898834	0.970022	0.990651	1.08853	1.04576	1.05172	0.777919	0.930813	0.972655	0.899807	0.962671	0.998759	0.926582	-1.87478
808	105	0	Picazo Centro	0.898834	0.970022	0.990651	1.08853	1.04576	1.05172	0.777919	0.930813	0.972655	0.899807	0.962671	0.998759	0.926582	-1.87478
809	90	0	Picazo Centro	0.898834	0.970022	0.990651	1.08853	1.04576	1.05172	0.777919	0.930813	0.972655	0.899807	0.962671	0.998759	0.926582	-1.87478
810	50	0	Picazo Centro	0.898834	0.970022	0.990651	1.08853	1.04576	1.05172	0.777919	0.930813	0.972655	0.899807	0.962671	0.998759	0.926582	-1.87478
811	30	0	Picazo Centro	0.898834	0.970022	0.990651	1.08853	1.04576	1.05172	0.777919	0.930813	0.972655	0.899807	0.962671	0.998759	0.926582	-1.87478
812	60	0	Picazo Centro	0.898834	0.970022	0.990651	1.08853	1.04576	1.05172	0.777919	0.930813	0.972655	0.899807	0.962671	0.998759	0.926582	-1.87478
813	30	0	Picazo Centro	0.898834	0.970022	0.990651	1.08853	1.04576	1.05172	0.777919	0.930813	0.972655	0.899807	0.962671	0.998759	0.926582	-1.87478
814	15	0	Picazo Centro	0.898834	0.970022	0.990651	1.08853	1.04576	1.05172	0.777919	0.930813	0.972655	0.899807	0.962671	0.998759	0.926582	-1.87478
815	90	0	Picazo Centro	0.898834	0.970022	0.990651	1.08853	1.04576	1.05172	0.777919	0.930813	0.972655	0.899807	0.962671	0.998759	0.926582	-1.87478
816	20	0	Picazo Centro	0.898834	0.970022	0.990651	1.08853	1.04576	1.05172	0.777919	0.930813	0.972655	0.899807	0.962671	0.998759	0.926582	-1.87478
817	110	0	Picazo Centro	0.898834	0.970022	0.990651	1.08853	1.04576	1.05172	0.777919	0.930813	0.972655	0.899807	0.962671	0.998759	0.926582	-1.87478
818	35	0	Picazo Centro	0.898834	0.970022	0.990651	1.08853	1.04576	1.05172	0.777919	0.930813	0.972655	0.899807	0.962671	0.998759	0.926582	-1.87478
819	180	0	Picazo Centro	0.898834	0.970022	0.990651	1.08853	1.04576	1.05172	0.777919	0.930813	0.972655	0.899807	0.962671	0.998759	0.926582	-1.87478
820	95	1	Picazo Centro	0.898834	0.970022	0.990651	1.08853	1.04576	1.05172	0.777919	0.930813	0.972655	0.899807	0.962671	0.998759	0.926582	-1.87478
821	100	0	Picazo Centro	0.898834	0.970022	0.990651	1.08853	1.04576	1.05172	0.777919	0.930813	0.972655	0.899807	0.962671	0.998759	0.926582	-1.87478
822	110	0	Picazo Centro	0.898834	0.970022	0.990651	1.08853	1.04576	1.05172	0.777919	0.930813	0.972655	0.899807	0.962671	0.998759	0.926582	-1.87478
823	40	0	Picazo Centro	0.898834	0.970022	0.990651	1.08853	1.04576	1.05172	0.777919	0.930813	0.972655	0.899807	0.962671	0.998759	0.926582	-1.87478
824	50	0	Picazo Centro	0.898834	0.970022	0.990651	1.08853	1.04576	1.05172	0.777919	0.930813	0.972655	0.899807	0.962671	0.998759	0.926582	-1.87478
825	60	0	Picazo Centro	0.898834	0.970022	0.990651	1.08853	1.04576	1.05172	0.777919	0.930813	0.972655	0.899807	0.962671	0.998759	0.926582	-1.87478
826	60	0	Picazo Centro	0.898834	0.970022	0.990651	1.08853	1.04576	1.05172	0.777919	0.930813	0.972655	0.899807	0.962671	0.998759	0.926582	-1.87478
827	60	0	Picazo Centro	0.898834	0.970022	0.990651	1.08853	1.04576	1.05172	0.777919	0.930813	0.972655	0.899807	0.962671	0.998759	0.926582	-1.87478
828	120	0	Picazo Centro	0.898834	0.970022	0.990651	1.08853	1.04576	1.05172	0.777919	0.930813	0.972655	0.899807	0.962671	0.998759	0.926582	-1.87478
829	30	0	Picazo Centro	0.898834	0.970022	0.990651	1.08853	1.04576	1.05172	0.777919	0.930813	0.972655	0.899807	0.962671	0.998759	0.926582	-1.87478
830	160	1	Picazo Centro	0.898834	0.970022	0.990651	1.08853	1.04576	1.05172	0.777919	0.930813	0.972655	0.899807	0.962671	0.998759	0.926582	-1.87478
831	40	0	Picazo Centro	0.898834	0.970022	0.990651	1.08853	1.04576	1.05172	0.777919	0.930813	0.972655	0.899807	0.962671	0.998759	0.926582	-1.87478
832	70	0	Picazo Centro	0.898834	0.970022	0.990651	1.08853	1.04576	1.05172	0.777919	0.930813	0.972655	0.899807	0.962671	0.998759	0.926582	-1.87478
833	160	1	Picazo Centro	0.898834	0.970022	0.990651	1.08853	1.04576	1.05172	0.777919	0.930813	0.972655	0.899807	0.962671	0.998759	0.926582	-1.87478
834	120	1	Picazo Centro	0.898834	0.970022	0.990651	1.08853	1.04576	1.05172	0.777919	0.930813	0.972655	0.899807	0.962671	0.998759	0.926582	-1.87478
835	70	0	Picazo Centro	0.898834	0.970022	0.990651	1.08853	1.04576	1.05172	0.777919	0.930813	0.972655	0.899807	0.962671	0.998759	0.926582	-1.87478
836	30	0	Picazo Centro	0.898834	0.970022	0.990651	1.08853	1.04576	1.05172	0.777919	0.930813	0.972655	0.899807	0.962671	0.998759	0.926582	-1.87478
837	15	0	Picazo Centro	0.898834	0.970022	0.990651	1.08853	1.04576	1.05172	0.777919	0.930813	0.972655	0.899807	0.962671	0.998759	0.926582	-1.87478
838	70	0	Picazo Centro	0.898834	0.970022	0.990651	1.08853	1.04576	1.05172	0.777919	0.930813	0.972655	0.899807	0.962671	0.998759	0.926582	-1.87478
839	80	0	Picazo Centro	0.898834	0.970022	0.990651	1.08853	1.04576	1.05172	0.777919	0.930813	0.972655	0.899807	0.962671	0.998759	0.926582	-1.87478
840	90	0	Picazo Centro	0.898834	0.970022	0.990651	1.08853	1.04576	1.05172	0.777919	0.930813	0.972655	0.899807	0.962671	0.998759	0.926582	-1.87478
841	80	1	Picazo Centro	0.898834	0.970022	0.990651	1.08853	1.04576	1.05172	0.777919	0.930813	0.972655	0.899807	0.962671	0.998759	0.926582	-1.87478
842	110	1	Picazo Centro	0.898834	0.970022	0.990651	1.08853	1.04576	1.05172	0.777919	0.930813	0.972655	0.899807	0.962671	0.998759	0.926582	-1.87478
843	120	1	Picazo Centro	0.898834	0.970022	0.990651	1.08853	1.04576	1.05172	0.777919	0.930813	0.972655	0.899807	0.962671	0.998759	0.926582	-1.87478
844	110	1	Picazo Centro	0.898834	0.970022	0.990651	1.08853	1.04576	1.05172	0.777919	0.930813	0.972655	0.899807	0.962671	0.998759	0.926582	-1.87478
845	120	0	Picazo Centro	0.898834	0.970022	0.990651	1.08853	1.04576	1.05172	0.777919	0.930813	0.972655	0.899807	0.962671	0.998759	0.926582	-1.87478
846	80	1	Picazo Centro	0.898834	0.970022	0.990651	1.08853	1.04576	1.05172	0.777919	0.930813	0.972655	0.899807	0.962671	0.998759	0.926582	-1.87478
847	60	0	Picazo Centro	0.898834	0.970022	0.990651	1.08853	1.04576	1.05172	0.777919	0.930813	0.972655	0.899807	0.962671	0.998759	0.926582	-1.87478
848	30	0	Picazo Centro	0.898834	0.970022	0.990651	1.08853	1.04576	1.05172	0.777919	0.930813	0.972655	0.899807	0.962671	0.998759	0.926582	-1.87478
849	30	0	Picazo Centro	0.898834	0.970022	0.990651	1.08853	1.04576	1.05172	0.777919	0.930813	0.972655	0.899807	0.962671	0.998759	0.926582	-1.87478
850	55	0	Picazo Centro	0.898834	0.970022	0.990651	1.08853	1.04576	1.05172	0.777919	0.930813	0.972655	0.899807	0.962671	0.998759	0.926582	-1.87478
851	70	1	Picazo Centro	0.898834	0.970022	0.990651	1.08853	1.04576	1.05172	0.777919	0.930813	0.972655	0.899807	0.962671	0.998759	0.926582	-1.87478
852	50	0	Picazo Centro	0.898834	0.970022	0.990651	1.08853	1.04576	1.05172	0.777919	0.930813	0.972655	0.899807	0.962671	0.998759	0.926582	-1.87478
853	110	1	Picazo Centro	0.898834	0.970022	0.990651	1.08853	1.04576	1.05172	0.777919	0.930813	0.972655	0.899807	0.962671	0.998759	0.926582	-1.87478
854	150	1	Picazo Centro	0.898834	0.970022	0.990651	1.08853	1.04576	1.05172	0.777919	0.930813	0.972655	0.899807	0.962671	0.998759	0.926582	-1.87478
855	110	1	Picazo Centro	0.898834	0.970022	0.990651	1.08853	1.04576	1.05172	0.777919	0.930813	0.972655	0.899807	0.962671	0.998759	0.926582	-1.87478
856	30	0	Picazo Centro	0.898834	0.970022	0.990651	1.08853	1.04576	1.05172	0.777919	0.930813	0.972655	0.899807	0.962671	0.998759	0.926582	-1.87478
857	50	0	Picazo Centro	0.898834	0.970022	0.990651	1.08853	1.04576	1.05172	0.777919	0.930813	0.972655	0.899807	0.962671	0.998759	0.926582	-1.87478
858	110	1	Picazo Centro	0.898834	0.970022	0.990651	1.08853	1.04576	1.05172	0.777919	0.930813	0.972655	0.899807	0.962671	0.998759	0.926582	-1.87478
859	70	1	Picazo Centro	0.898834	0.970022	0.990651	1.08853	1.04576	1.05172	0.777919	0.930813	0.972655	0.899807	0.962671	0.998759	0.926582	-1.87478
860	120	1	Picazo Centro	0.898834	0.970022	0.990651	1.08853	1.04576	1.05172	0.777919	0.930813	0.972655	0.899807	0.962671	0.998759	0.926582	-1.87478
861	70	1	Picazo Centro	0.898834	0.970022	0.990651	1.08853	1.04576	1.05172	0.777919	0.930813	0.972655	0.899807	0.962671	0.998759	0.926582	-1.87478
862	90	0	Picazo Centro	0.898834	0.970022	0.990651	1.08853	1.04576	1.05172	0.777919	0.930813	0.972655	0.899807	0.962671	0.998759	0.926582	-1.87478
863	60	0	Picazo Centro	0.898834	0.970022	0.990651	1.08853	1.04576	1.05172	0.777919	0.930813	0.972655	0.899807	0.962671	0.998759	0.926582	-1.87478
864	70	1	Picazo Centro	0.898834	0.970022	0.990651	1.08853	1.04576	1.05172	0.777919	0.930813	0.972655	0.899807	0.962671	0.998759	0.926582	-1.87478
865	18	0	Picazo Centro	0.898834	0.970022	0.990651	1.08853	1.04576	1.05172	0.777919	0.930813	0.972655	0.899807	0.962671	0.998759	0.926582	-1.87478
866	20	0	Picazo Centro	0.898834	0.970022	0.990651	1.08853	1.04576	1.05172	0.777919	0.930813	0.972655	0.899807	0.962671	0.998759	0.926582	-1.87478
867	40	0	Picazo Centro	0.898834	0.970022	0.990651	1.08853	1.04576	1.05172	0.777919	0.930813	0.972655	0.899807	0.962671	0.998759	0.926582	-1.87478
868	50	1	Picazo Centro	0.898834	0.970022	0.990651	1.08853	1.04576	1.05172	0.777919	0.930813	0.972655	0.899807	0.962671	0.998759	0.926582	-1.87478
869	140	1	Picazo Centro	0.898834	0.970022	0.990651	1.08853	1.04576	1.05172	0.777919	0.930813	0.972655	0.899807	0.962671	0.998759	0.926582	-1.87478
870	120	1	Picazo Centro	0.898834	0.970022	0.990651	1.08853	1.04576	1.05172	0.777919	0.930813	0.972655	0.899807	0.962671	0.998759	0.926582	-1.87478
871	40	0	Picazo Centro	0.898834	0.970022	0.990651	1.08853	1.04576	1.05172	0.777919	0.930813	0.972655	0.899807	0.962671	0.998759	0.926582	-1.87478
872	140	1	Picazo Centro	0.898834	0.970022	0.990651	1.08853	1.04576	1.05172	0.777919	0.930813	0.972655	0.899807	0.962671	0.998759	0.926582	-1.87478
873	80	1	Picazo Centro	0.898834	0.970022	0.990651	1.08853	1.04576	1.05172	0.777919	0.930813	0.972655	0.899807	0.962671	0.998759	0.926582	-1.87478
874	110	1	Picazo Centro	0.898834	0.970022	0.990651	1.08853	1.04576	1.05172	0.777919	0.930813	0.972655	0.899807	0.962671	0.998759	0.926582	-1.87478
875	100	1	Picazo Centro	0.898834	0.970022	0.990651	1.08853	1.04576	1.05172	0.777919	0.930813	0.972655	0.899807	0.962671	0.998759	0.926582	-1.87478
876	40	0	Picazo Centro	0.898834	0.970022	0.990651	1.08853	1.04576	1.05172	0.777919	0.930813	0.972655	0.899807	0.962671	0.998759	0.926582	-1.87478
877	40	1	Picazo Centro	0.898834	0.970022	0.990651	1.08853	1.04576	1.05172	0.777919	0.930813	0.972655	0.899807	0.962671	0.998759	0.926582	-1.87478
878	35	0	Picazo Centro	0.898834	0.970022	0.990651	1.08853	1.04576	1.05172	0.777919	0.930813	0.972655	0.899807	0.962671	0.998759	0.926582	-1.87478
879	30	0	Picazo Centro	0.898834	0.970022	0.990651	1.08853	1.04576	1.05172	0.777919	0.930813	0.972655	0.899807	0.962671	0.998759	0.926582	-1.87478
880	90	0	Picazo Centro	0.898834	0.970022	0.990651	1.08853	1.04576	1.05172	0.777919	0.930813	0.972655	0.899807	0.962671	0.998759	0.926582	-1.87478
881	50	0	Picazo Centro	0.898834	0.970022	0.990651	1.08853	1.04576	1.05172	0.777919	0.930813	0.972655	0.899807	0.962671	0.998759	0.926582	-1.87478
882	40	0	Picazo Centro	0.898834	0.970022	0.990651	1.08853	1.04576	1.05172	0.777919	0.930813	0.972655	0.899807	0.962671	0.998759	0.926582	-1.87478
883	30	0	Picazo Centro	0.898834	0.970022	0.990651	1.08853	1.04576	1.05172	0.777919	0.930813	0.972655	0.899807	0.962671	0.998759	0.926582	-1.87478
884	130	1	Picazo Centro	0.898834	0.970022	0.990651	1.08853	1.04576	1.05172	0.777919	0.930813	0.972655	0.899807	0.962671	0.998759	0.926582	-1.87478
885	110	1	Picazo Centro	0.898834	0.970022	0.990651	1.08853	1.04576	1.05172	0.777919	0.930813	0.972655	0.899807	0.962671	0.998759	0.926582	-1.87478
886	30	0	Picazo Centro	0.898834	0.970022	0.990651	1.08853	1.04576	1.05172	0.777919	0.930813	0.972655	0.899807	0.962671	0.998759	0.926582	-1.87478
887	90	1	Picazo Centro	0.898834	0.970022	0.990651	1.08853	1.04576	1.05172	0.777919	0.930813	0.972655	0.899807	0.962671	0.998759	0.926582	-1.87478
888	130	1	Picazo Centro	0.898834	0.970022	0.990651	1.08853	1.04576	1.05172	0.777919	0.930813	0.972655	0.899807	0.962671	0.998759	0.926582	-1.87478
889	140	1	Picazo Centro	0.898834	0.970022	0.990651	1.08853	1.04576	1.05172	0.777919	0.930813	0.972655	0.899807	0.962671	0.998759	0.926582	-1.87478
890	130	1	Picazo Centro	0.898834	0.970022	0.990651	1.08853	1.04576	1.05172	0.777919	0.930813	0.972655	0.899807	0.962671	0.998759	0.926582	-1.87478
891	130	1	Picazo Centro	0.898834	0.970022	0.990651	1.08853	1.04576	1.05172	0.777919	0.930813	0.972655	0.899807	0.962671	0.998759	0.926582	-1.87478
892	30	0	Picazo Centro	0.898834	0.970022	0.990651	1.08853	1.04576	1.05172	0.777919	0.930813	0.972655	0.899807	0.962671	0.998759	0.926582	-1.87478
893	110	0	Picazo Centro	0.898834	0.970022	0.990651	1.08853	1.04576	1.05172	0.777919	0.930813	0.972655	0.899807	0.962671	0.998759	0.926582	-1.87478
894	60	0	Picazo Centro	0.898834	0.970022	0.990651	1.08853	1.04576	1.05172	0.777919	0.930813	0.972655	0.899807	0.962671	0.998759	0.926582	-1.87478
895	40	0	Picazo Centro	0.898834	0.970022	0.990651	1.08853	1.04576	1.05172	0.777919	0.930813	0.972655	0.899807	0.962671	0.998759	0.926582	-1.87478
896	80	1	Picazo Sur	1.08877	0.974513	0.993657	1.1022	1.04576	1.05172	0.800799	0.960145	0.991633	0.934549	0.994374	1.04098	0.947769	-1.717
897	120	1	Picazo Sur	1.08877	0.974513	0.993657	1.1022	1.04576	1.05172	0.800799	0.960145	0.991633	0.934549	0.994374	1.04098	0.947769	-1.717
898	90	1	Picazo Sur	1.08877	0.974513	0.993657	1.1022	1.04576	1.05172	0.800799	0.960145	0.991633	0.934549	0.994374	1.04098	0.947769	-1.717
899	120	1	Picazo Sur	1.08877	0.974513	0.993657	1.1022	1.04576	1.05172	0.800799	0.960145	0.991633	0.934549	0.994374	1.04098	0.947769	-1.717
900	40	0	Picazo Sur	1.08877	0.974513	0.993657	1.1022	1.04576	1.05172	0.800799	0.960145	0.991633	0.934549	0.994374	1.04098	0.947769	-1.717
901	40	0	Picazo Sur	1.08877	0.974513	0.993657	1.1022	1.04576	1.05172	0.800799	0.960145	0.991633	0.934549	0.994374	1.04098	0.947769	-1.717
902	40	0	Picazo Sur	1.08877	0.974513	0.993657	1.1022	1.04576	1.05172	0.800799	0.960145	0.991633	0.934549	0.994374	1.04098	0.947769	-1.717
903	40	0	Picazo Sur	1.08877	0.974513	0.993657	1.1022	1.04576	1.05172	0.800799	0.960145	0.991633	0.934549	0.994374	1.04098	0.947769	-1.717
904	70	1	Picazo Sur	1.08877	0.974513	0.993657	1.1022	1.04576	1.05172	0.800799	0.960145	0.991633	0.934549	0.994374	1.04098	0.947769	-1.717
905	40	0	Picazo Sur	1.08877	0.974513	0.993657	1.1022	1.04576	1.05172	0.800799	0.960145	0.991633	0.934549	0.994374	1.04098	0.947769	-1.717
906	60	0	Picazo Sur	1.08877	0.974513	0.993657	1.1022	1.04576	1.05172	0.800799	0.960145	0.991633	0.934549	0.994374	1.04098	0.947769	-1.717
907	30	0	Picazo Sur	1.08877	0.974513	0.993657	1.1022	1.04576	1.05172	0.800799	0.960145	0.991633	0.934549	0.994374	1.04098	0.947769	-1.717
908	25	0	Picazo Sur	1.08877	0.974513	0.993657	1.1022	1.04576	1.05172	0.800799	0.960145	0.991633	0.934549	0.994374	1.04098	0.947769	-1.717
909	60	0	Picazo Sur	1.08877	0.974513	0.993657	1.1022	1.04576	1.05172	0.800799	0.960145	0.991633	0.934549	0.994374	1.04098	0.947769	-1.717
910	60	1	Picazo Sur	1.08877	0.974513	0.993657	1.1022	1.04576	1.05172	0.800799	0.960145	0.991633	0.934549	0.994374	1.04098	0.947769	-1.717
911	20	0	Picazo Sur	1.08877	0.974513	0.993657	1.1022	1.04576	1.05172	0.800799	0.960145	0.991633	0.934549	0.994374	1.04098	0.947769	-1.717
912	40	0	Picazo Sur	1.08877	0.974513	0.993657	1.1022	1.04576	1.05172	0.800799	0.960145	0.991633	0.934549	0.994374	1.04098	0.947769	-1.717
913	30	0	Picazo Sur	1.08877	0.974513	0.993657	1.1022	1.04576	1.05172	0.800799	0.960145	0.991633	0.934549	0.994374	1.04098	0.947769	-1.717
914	30	0	Picazo Sur	1.08877	0.974513	0.993657	1.1022	1.04576	1.05172	0.800799	0.960145	0.991633	0.934549	0.994374	1.04098	0.947769	-1.717
915	15	0	Picazo Sur	1.08877	0.974513	0.993657	1.1022	1.04576	1.05172	0.800799	0.960145	0.991633	0.934549	0.994374	1.04098	0.947769	-1.717
916	20	0	Picazo Sur	1.08877	0.974513	0.993657	1.1022	1.04576	1.05172	0.800799	0.960145	0.991633	0.934549	0.994374	1.04098	0.947769	-1.717
917	20	0	Picazo Sur	1.08877	0.974513	0.993657	1.1022	1.04576	1.05172	0.800799	0.960145	0.991633	0.934549	0.994374	1.04098	0.947769	-1.717
918	150	0	Picazo Sur	1.08877	0.974513	0.993657	1.1022	1.04576	1.05172	0.800799	0.960145	0.991633	0.934549	0.994374	1.04098	0.947769	-1.717
919	20	0	Picazo Sur	1.08877	0.974513	0.993657	1.1022	1.04576	1.05172	0.800799	0.960145	0.991633	0.934549	0.994374	1.04098	0.947769	-1.717
920	48	0	Picazo Sur	1.08877	0.974513	0.993657	1.1022	1.04576	1.05172	0.800799	0.960145	0.991633	0.934549	0.994374	1.04098	0.947769	-1.717
921	20	0	Picazo Sur	1.08877	0.974513	0.993657	1.1022	1.04576	1.05172	0.800799	0.960145	0.991633	0.934549	0.994374	1.04098	0.947769	-1.717
922	40	0	Picazo Sur	1.08877	0.974513	0.993657	1.1022	1.04576	1.05172	0.800799	0.960145	0.991633	0.934549	0.994374	1.04098	0.947769	-1.717
923	25	0	Picazo Sur	1.08877	0.974513	0.993657	1.1022	1.04576	1.05172	0.800799	0.960145	0.991633	0.934549	0.994374	1.04098	0.947769	-1.717
924	50	0	Picazo Sur	1.08877	0.974513	0.993657	1.1022	1.04576	1.05172	0.800799	0.960145	0.991633	0.934549	0.994374	1.04098	0.947769	-1.717
925	30	0	Picazo Sur	1.08877	0.974513	0.993657	1.1022	1.04576	1.05172	0.800799	0.960145	0.991633	0.934549	0.994374	1.04098	0.947769	-1.717
926	60	1	Picazo Sur	1.08877	0.974513	0.993657	1.1022	1.04576	1.05172	0.800799	0.960145	0.991633	0.934549	0.994374	1.04098	0.947769	-1.717
927	50	0	Picazo Sur	1.08877	0.974513	0.993657	1.1022	1.04576	1.05172	0.800799	0.960145	0.991633	0.934549	0.994374	1.04098	0.947769	-1.717
928	20	0	Picazo Sur	1.08877	0.974513	0.993657	1.1022	1.04576	1.05172	0.800799	0.960145	0.991633	0.934549	0.994374	1.04098	0.947769	-1.717
929	15	0	Picazo Sur	1.08877	0.974513	0.993657	1.1022	1.04576	1.05172	0.800799	0.960145	0.991633	0.934549	0.994374	1.04098	0.947769	-1.717
930	40	0	Picazo Sur	1.08877	0.974513	0.993657	1.1022	1.04576	1.05172	0.800799	0.960145	0.991633	0.934549	0.994374	1.04098	0.947769	-1.717
931	30	0	Picazo Sur	1.08877	0.974513	0.993657	1.1022	1.04576	1.05172	0.800799	0.960145	0.991633	0.934549	0.994374	1.04098	0.947769	-1.717
932	160	1	Picazo Sur	1.08877	0.974513	0.993657	1.1022	1.04576	1.05172	0.800799	0.960145	0.991633	0.934549	0.994374	1.04098	0.947769	-1.717
933	20	0	Picazo Sur	1.08877	0.974513	0.993657	1.1022	1.04576	1.05172	0.800799	0.960145	0.991633	0.934549	0.994374	1.04098	0.947769	-1.717
934	30	0	Picazo Sur	1.08877	0.974513	0.993657	1.1022	1.04576	1.05172	0.800799	0.960145	0.991633	0.934549	0.994374	1.04098	0.947769	-1.717
935	160	1	Picazo Sur	1.08877	0.974513	0.993657	1.1022	1.04576	1.05172	0.800799	0.960145	0.991633	0.934549	0.994374	1.04098	0.947769	-1.717
936	60	1	Picazo Sur	1.08877	0.974513	0.993657	1.1022	1.04576	1.05172	0.800799	0.960145	0.991633	0.934549	0.994374	1.04098	0.947769	-1.717
937	120	1	Picazo Sur	1.08877	0.974513	0.993657	1.1022	1.04576	1.05172	0.800799	0.960145	0.991633	0.934549	0.994374	1.04098	0.947769	-1.717
938	130	1	Picazo Sur	1.08877	0.974513	0.993657	1.1022	1.04576	1.05172	0.800799	0.960145	0.991633	0.934549	0.994374	1.04098	0.947769	-1.717
939	60	1	Picazo Sur	1.08877	0.974513	0.993657	1.1022	1.04576	1.05172	0.800799	0.960145	0.991633	0.934549	0.994374	1.04098	0.947769	-1.717
940	40	0	Picazo Sur	1.08877	0.974513	0.993657	1.1022	1.04576	1.05172	0.800799	0.960145	0.991633	0.934549	0.994374	1.04098	0.947769	-1.717
941	30	0	Picazo Sur	1.08877	0.974513	0.993657	1.1022	1.04576	1.05172	0.800799	0.960145	0.991633	0.934549	0.994374	1.04098	0.947769	-1.717
942	50	0	Picazo Sur	1.08877	0.974513	0.993657	1.1022	1.04576	1.05172	0.800799	0.960145	0.991633	0.934549	0.994374	1.04098	0.947769	-1.717
943	40	0	Picazo Sur	1.08877	0.974513	0.993657	1.1022	1.04576	1.05172	0.800799	0.960145	0.991633	0.934549	0.994374	1.04098	0.947769	-1.717
944	50	1	Picazo Sur	1.08877	0.974513	0.993657	1.1022	1.04576	1.05172	0.800799	0.960145	0.991633	0.934549	0.994374	1.04098	0.947769	-1.717
945	60	0	Picazo Sur	1.08877	0.974513	0.993657	1.1022	1.04576	1.05172	0.800799	0.960145	0.991633	0.934549	0.994374	1.04098	0.947769	-1.717
946	70	1	Picazo Sur	1.08877	0.974513	0.993657	1.1022	1.04576	1.05172	0.800799	0.960145	0.991633	0.934549	0.994374	1.04098	0.947769	-1.717
947	140	1	Picazo Sur	1.08877	0.974513	0.993657	1.1022	1.04576	1.05172	0.800799	0.960145	0.991633	0.934549	0.994374	1.04098	0.947769	-1.717
948	110	1	Picazo Sur	1.08877	0.974513	0.993657	1.1022	1.04576	1.05172	0.800799	0.960145	0.991633	0.934549	0.994374	1.04098	0.947769	-1.717
949	60	1	Picazo Sur	1.08877	0.974513	0.993657	1.1022	1.04576	1.05172	0.800799	0.960145	0.991633	0.934549	0.994374	1.04098	0.947769	-1.717
950	80	1	Picazo Sur	1.08877	0.974513	0.993657	1.1022	1.04576	1.05172	0.800799	0.960145	0.991633	0.934549	0.994374	1.04098	0.947769	-1.717
951	60	0	Picazo Sur	1.08877	0.974513	0.993657	1.1022	1.04576	1.05172	0.800799	0.960145	0.991633	0.934549	0.994374	1.04098	0.947769	-1.717
952	50	1	Picazo Sur	1.08877	0.974513	0.993657	1.1022	1.04576	1.05172	0.800799	0.960145	0.991633	0.934549	0.994374	1.04098	0.947769	-1.717
953	40	0	Picazo Sur	1.08877	0.974513	0.993657	1.1022	1.04576	1.05172	0.800799	0.960145	0.991633	0.934549	0.994374	1.04098	0.947769	-1.717
954	40	0	Picazo Sur	1.08877	0.974513	0.993657	1.1022	1.04576	1.05172	0.800799	0.960145	0.991633	0.934549	0.994374	1.04098	0.947769	-1.717
955	20	0	Picazo Sur	1.08877	0.974513	0.993657	1.1022	1.04576	1.05172	0.800799	0.960145	0.991633	0.934549	0.994374	1.04098	0.947769	-1.717
956	15	0	Picazo Sur	1.08877	0.974513	0.993657	1.1022	1.04576	1.05172	0.800799	0.960145	0.991633	0.934549	0.994374	1.04098	0.947769	-1.717
957	30	0	Picazo Sur	1.08877	0.974513	0.993657	1.1022	1.04576	1.05172	0.800799	0.960145	0.991633	0.934549	0.994374	1.04098	0.947769	-1.717
958	90	0	Picazo Sur	1.08877	0.974513	0.993657	1.1022	1.04576	1.05172	0.800799	0.960145	0.991633	0.934549	0.994374	1.04098	0.947769	-1.717
959	140	0	Picazo Sur	1.08877	0.974513	0.993657	1.1022	1.04576	1.05172	0.800799	0.960145	0.991633	0.934549	0.994374	1.04098	0.947769	-1.717
960	30	0	Picazo Sur	1.08877	0.974513	0.993657	1.1022	1.04576	1.05172	0.800799	0.960145	0.991633	0.934549	0.994374	1.04098	0.947769	-1.717
961	80	1	Picazo Sur	1.08877	0.974513	0.993657	1.1022	1.04576	1.05172	0.800799	0.960145	0.991633	0.934549	0.994374	1.04098	0.947769	-1.717
962	40	0	Picazo Sur	1.08877	0.974513	0.993657	1.1022	1.04576	1.05172	0.800799	0.960145	0.991633	0.934549	0.994374	1.04098	0.947769	-1.717
963	40	0	Picazo Sur	1.08877	0.974513	0.993657	1.1022	1.04576	1.05172	0.800799	0.960145	0.991633	0.934549	0.994374	1.04098	0.947769	-1.717
964	130	1	Picazo Sur	1.08877	0.974513	0.993657	1.1022	1.04576	1.05172	0.800799	0.960145	0.991633	0.934549	0.994374	1.04098	0.947769	-1.717
965	40	0	Picazo Sur	1.08877	0.974513	0.993657	1.1022	1.04576	1.05172	0.800799	0.960145	0.991633	0.934549	0.994374	1.04098	0.947769	-1.717
966	30	0	Picazo Sur	1.08877	0.974513	0.993657	1.1022	1.04576	1.05172	0.800799	0.960145	0.991633	0.934549	0.994374	1.04098	0.947769	-1.717
967	70	1	Picazo Sur	1.08877	0.974513	0.993657	1.1022	1.04576	1.05172	0.800799	0.960145	0.991633	0.934549	0.994374	1.04098	0.947769	-1.717
968	90	1	Picazo Sur	1.08877	0.974513	0.993657	1.1022	1.04576	1.05172	0.800799	0.960145	0.991633	0.934549	0.994374	1.04098	0.947769	-1.717
969	40	0	Picazo Sur	1.08877	0.974513	0.993657	1.1022	1.04576	1.05172	0.800799	0.960145	0.991633	0.934549	0.994374	1.04098	0.947769	-1.717
970	140	1	Picazo Sur	1.08877	0.974513	0.993657	1.1022	1.04576	1.05172	0.800799	0.960145	0.991633	0.934549	0.994374	1.04098	0.947769	-1.717
971	50	0	Picazo Sur	1.08877	0.974513	0.993657	1.1022	1.04576	1.05172	0.800799	0.960145	0.991633	0.934549	0.994374	1.04098	0.947769	-1.717
972	30	0	Picazo Sur	1.08877	0.974513	0.993657	1.1022	1.04576	1.05172	0.800799	0.960145	0.991633	0.934549	0.994374	1.04098	0.947769	-1.717
973	25	0	Picazo Sur	1.08877	0.974513	0.993657	1.1022	1.04576	1.05172	0.800799	0.960145	0.991633	0.934549	0.994374	1.04098	0.947769	-1.717
974	80	0	Picazo Sur	1.08877	0.974513	0.993657	1.1022	1.04576	1.05172	0.800799	0.960145	0.991633	0.934549	0.994374	1.04098	0.947769	-1.717
975	50	0	Picazo Sur	1.08877	0.974513	0.993657	1.1022	1.04576	1.05172	0.800799	0.960145	0.991633	0.934549	0.994374	1.04098	0.947769	-1.717
976	20	0	Picazo Sur	1.08877	0.974513	0.993657	1.1022	1.04576	1.05172	0.800799	0.960145	0.991633	0.934549	0.994374	1.04098	0.947769	-1.717
977	20	0	Picazo Sur	1.08877	0.974513	0.993657	1.1022	1.04576	1.05172	0.800799	0.960145	0.991633	0.934549	0.994374	1.04098	0.947769	-1.717
978	25	0	Picazo Sur	1.08877	0.974513	0.993657	1.1022	1.04576	1.05172	0.800799	0.960145	0.991633	0.934549	0.994374	1.04098	0.947769	-1.717
979	30	0	Picazo Sur	1.08877	0.974513	0.993657	1.1022	1.04576	1.05172	0.800799	0.960145	0.991633	0.934549	0.994374	1.04098	0.947769	-1.717
980	50	0	Picazo Sur	1.08877	0.974513	0.993657	1.1022	1.04576	1.05172	0.800799	0.960145	0.991633	0.934549	0.994374	1.04098	0.947769	-1.717
981	40	0	Picazo Sur	1.08877	0.974513	0.993657	1.1022	1.04576	1.05172	0.800799	0.960145	0.991633	0.934549	0.994374	1.04098	0.947769	-1.717
982	55	1	Picazo Sur	1.08877	0.974513	0.993657	1.1022	1.04576	1.05172	0.800799	0.960145	0.991633	0.934549	0.994374	1.04098	0.947769	-1.717
983	100	0	Picazo Sur	1.08877	0.974513	0.993657	1.1022	1.04576	1.05172	0.800799	0.960145	0.991633	0.934549	0.994374	1.04098	0.947769	-1.717
984	50	0	Picazo Sur	1.08877	0.974513	0.993657	1.1022	1.04576	1.05172	0.800799	0.960145	0.991633	0.934549	0.994374	1.04098	0.947769	-1.717
985	60	0	Picazo Sur	1.08877	0.974513	0.993657	1.1022	1.04576	1.05172	0.800799	0.960145	0.991633	0.934549	0.994374	1.04098	0.947769	-1.717
986	15	0	Picazo Sur	1.08877	0.974513	0.993657	1.1022	1.04576	1.05172	0.800799	0.960145	0.991633	0.934549	0.994374	1.04098	0.947769	-1.717
987	70	0	Picazo Sur	1.08877	0.974513	0.993657	1.1022	1.04576	1.05172	0.800799	0.960145	0.991633	0.934549	0.994374	1.04098	0.947769	-1.717
988	70	0	Picazo Sur	1.08877	0.974513	0.993657	1.1022	1.04576	1.05172	0.800799	0.960145	0.991633	0.934549	0.994374	1.04098	0.947769	-1.717
989	50	0	Picazo Sur	1.08877	0.974513	0.993657	1.1022	1.04576	1.05172	0.800799	0.960145	0.991633	0.934549	0.994374	1.04098	0.947769	-1.717
990	20	0	Picazo Sur	1.08877	0.974513	0.993657	1.1022	1.04576	1.05172	0.800799	0.960145	0.991633	0.934549	0.994374	1.04098	0.947769	-1.717
991	30	0	Picazo Sur	1.08877	0.974513	0.993657	1.1022	1.04576	1.05172	0.800799	0.960145	0.991633	0.934549	0.994374	1.04098	0.947769	-1.717
992	140	1	Picazo Sur	1.08877	0.974513	0.993657	1.1022	1.04576	1.05172	0.800799	0.960145	0.991633	0.934549	0.994374	1.04098	0.947769	-1.717
993	75	0	Picazo Sur	1.08877	0.974513	0.993657	1.1022	1.04576	1.05172	0.800799	0.960145	0.991633	0.934549	0.994374	1.04098	0.947769	-1.717
994	50	0	Picazo Sur	1.08877	0.974513	0.993657	1.1022	1.04576	1.05172	0.800799	0.960145	0.991633	0.934549	0.994374	1.04098	0.947769	-1.717
995	50	1	Picazo Sur	1.08877	0.974513	0.993657	1.1022	1.04576	1.05172	0.800799	0.960145	0.991633	0.934549	0.994374	1.04098	0.947769	-1.717
996	40	1	Picazo Sur	1.08877	0.974513	0.993657	1.1022	1.04576	1.05172	0.800799	0.960145	0.991633	0.934549	0.994374	1.04098	0.947769	-1.717
997	30	0	Picazo Sur	1.08877	0.974513	0.993657	1.1022	1.04576	1.05172	0.800799	0.960145	0.991633	0.934549	0.994374	1.04098	0.947769	-1.717
998	60	0	Picazo Sur	1.08877	0.974513	0.993657	1.1022	1.04576	1.05172	0.800799	0.960145	0.991633	0.934549	0.994374	1.04098	0.947769	-1.717
999	40	0	Picazo Sur	1.08877	0.974513	0.993657	1.1022	1.04576	1.05172	0.800799	0.960145	0.991633	0.934549	0.994374	1.04098	0.947769	-1.717
1000	90	0	Picazo Sur	1.08877	0.974513	0.993657	1.1022	1.04576	1.05172	0.800799	0.960145	0.991633	0.934549	0.994374	1.04098	0.947769	-1.717
1001	80	1	Picazo Sur	1.08877	0.974513	0.993657	1.1022	1.04576	1.05172	0.800799	0.960145	0.991633	0.934549	0.994374	1.04098	0.947769	-1.717
1002	40	1	Picazo Sur	1.08877	0.974513	0.993657	1.1022	1.04576	1.05172	0.800799	0.960145	0.991633	0.934549	0.994374	1.04098	0.947769	-1.717
1003	40	1	Picazo Sur	1.08877	0.974513	0.993657	1.1022	1.04576	1.05172	0.800799	0.960145	0.991633	0.934549	0.994374	1.04098	0.947769	-1.717
1004	40	1	Picazo Sur	1.08877	0.974513	0.993657	1.1022	1.04576	1.05172	0.800799	0.960145	0.991633	0.934549	0.994374	1.04098	0.947769	-1.717
1005	50	0	Los Patos	1.16367	0.970022	1.00117	1.1022	1.04317	1.07593	0.747999	0.991433	1.05094	0.974502	1.0121	1.05605	0.96816	-0.111373
1006	50	0	Los Patos	1.16367	0.970022	1.00117	1.1022	1.04317	1.07593	0.747999	0.991433	1.05094	0.974502	1.0121	1.05605	0.96816	-0.111373
1007	70	1	Los Patos	1.16367	0.970022	1.00117	1.1022	1.04317	1.07593	0.747999	0.991433	1.05094	0.974502	1.0121	1.05605	0.96816	-0.111373
1008	70	0	Los Patos	1.16367	0.970022	1.00117	1.1022	1.04317	1.07593	0.747999	0.991433	1.05094	0.974502	1.0121	1.05605	0.96816	-0.111373
1009	70	1	Los Patos	1.16367	0.970022	1.00117	1.1022	1.04317	1.07593	0.747999	0.991433	1.05094	0.974502	1.0121	1.05605	0.96816	-0.111373
1010	120	0	Los Patos	1.16367	0.970022	1.00117	1.1022	1.04317	1.07593	0.747999	0.991433	1.05094	0.974502	1.0121	1.05605	0.96816	-0.111373
1011	90	1	Los Patos	1.16367	0.970022	1.00117	1.1022	1.04317	1.07593	0.747999	0.991433	1.05094	0.974502	1.0121	1.05605	0.96816	-0.111373
1012	40	1	Los Patos	1.16367	0.970022	1.00117	1.1022	1.04317	1.07593	0.747999	0.991433	1.05094	0.974502	1.0121	1.05605	0.96816	-0.111373
1013	46	0	Los Patos	1.16367	0.970022	1.00117	1.1022	1.04317	1.07593	0.747999	0.991433	1.05094	0.974502	1.0121	1.05605	0.96816	-0.111373
1014	50	0	Los Patos	1.16367	0.970022	1.00117	1.1022	1.04317	1.07593	0.747999	0.991433	1.05094	0.974502	1.0121	1.05605	0.96816	-0.111373
1015	50	0	Los Patos	1.16367	0.970022	1.00117	1.1022	1.04317	1.07593	0.747999	0.991433	1.05094	0.974502	1.0121	1.05605	0.96816	-0.111373
1016	70	1	Los Patos	1.16367	0.970022	1.00117	1.1022	1.04317	1.07593	0.747999	0.991433	1.05094	0.974502	1.0121	1.05605	0.96816	-0.111373
1017	60	0	Los Patos	1.16367	0.970022	1.00117	1.1022	1.04317	1.07593	0.747999	0.991433	1.05094	0.974502	1.0121	1.05605	0.96816	-0.111373
1018	70	1	Los Patos	1.16367	0.970022	1.00117	1.1022	1.04317	1.07593	0.747999	0.991433	1.05094	0.974502	1.0121	1.05605	0.96816	-0.111373
1019	120	0	Los Patos	1.16367	0.970022	1.00117	1.1022	1.04317	1.07593	0.747999	0.991433	1.05094	0.974502	1.0121	1.05605	0.96816	-0.111373
1020	60	0	Los Patos	1.16367	0.970022	1.00117	1.1022	1.04317	1.07593	0.747999	0.991433	1.05094	0.974502	1.0121	1.05605	0.96816	-0.111373
1021	40	0	Los Patos	1.16367	0.970022	1.00117	1.1022	1.04317	1.07593	0.747999	0.991433	1.05094	0.974502	1.0121	1.05605	0.96816	-0.111373
1022	10	0	Los Patos	1.16367	0.970022	1.00117	1.1022	1.04317	1.07593	0.747999	0.991433	1.05094	0.974502	1.0121	1.05605	0.96816	-0.111373
1023	50	0	Los Patos	1.16367	0.970022	1.00117	1.1022	1.04317	1.07593	0.747999	0.991433	1.05094	0.974502	1.0121	1.05605	0.96816	-0.111373
1024	50	0	Los Patos	1.16367	0.970022	1.00117	1.1022	1.04317	1.07593	0.747999	0.991433	1.05094	0.974502	1.0121	1.05605	0.96816	-0.111373
1025	100	0	Los Patos	1.16367	0.970022	1.00117	1.1022	1.04317	1.07593	0.747999	0.991433	1.05094	0.974502	1.0121	1.05605	0.96816	-0.111373
1026	55	0	Los Patos	1.16367	0.970022	1.00117	1.1022	1.04317	1.07593	0.747999	0.991433	1.05094	0.974502	1.0121	1.05605	0.96816	-0.111373
1027	50	0	Los Patos	1.16367	0.970022	1.00117	1.1022	1.04317	1.07593	0.747999	0.991433	1.05094	0.974502	1.0121	1.05605	0.96816	-0.111373
1028	50	0	Los Patos	1.16367	0.970022	1.00117	1.1022	1.04317	1.07593	0.747999	0.991433	1.05094	0.974502	1.0121	1.05605	0.96816	-0.111373
1029	60	0	Los Patos	1.16367	0.970022	1.00117	1.1022	1.04317	1.07593	0.747999	0.991433	1.05094	0.974502	1.0121	1.05605	0.96816	-0.111373
1030	130	0	Los Patos	1.16367	0.970022	1.00117	1.1022	1.04317	1.07593	0.747999	0.991433	1.05094	0.974502	1.0121	1.05605	0.96816	-0.111373
1031	100	0	Los Patos	1.16367	0.970022	1.00117	1.1022	1.04317	1.07593	0.747999	0.991433	1.05094	0.974502	1.0121	1.05605	0.96816	-0.111373
1032	50	0	Los Patos	1.16367	0.970022	1.00117	1.1022	1.04317	1.07593	0.747999	0.991433	1.05094	0.974502	1.0121	1.05605	0.96816	-0.111373
1033	90	0	Los Patos	1.16367	0.970022	1.00117	1.1022	1.04317	1.07593	0.747999	0.991433	1.05094	0.974502	1.0121	1.05605	0.96816	-0.111373
1034	79	0	Los Patos	1.16367	0.970022	1.00117	1.1022	1.04317	1.07593	0.747999	0.991433	1.05094	0.974502	1.0121	1.05605	0.96816	-0.111373
1035	25	0	Los Patos	1.16367	0.970022	1.00117	1.1022	1.04317	1.07593	0.747999	0.991433	1.05094	0.974502	1.0121	1.05605	0.96816	-0.111373
1036	60	0	Los Patos	1.16367	0.970022	1.00117	1.1022	1.04317	1.07593	0.747999	0.991433	1.05094	0.974502	1.0121	1.05605	0.96816	-0.111373
1037	20	0	Los Patos	1.16367	0.970022	1.00117	1.1022	1.04317	1.07593	0.747999	0.991433	1.05094	0.974502	1.0121	1.05605	0.96816	-0.111373
1038	80	0	Los Patos	1.16367	0.970022	1.00117	1.1022	1.04317	1.07593	0.747999	0.991433	1.05094	0.974502	1.0121	1.05605	0.96816	-0.111373
1039	70	0	Los Patos	1.16367	0.970022	1.00117	1.1022	1.04317	1.07593	0.747999	0.991433	1.05094	0.974502	1.0121	1.05605	0.96816	-0.111373
1040	30	0	Los Patos	1.16367	0.970022	1.00117	1.1022	1.04317	1.07593	0.747999	0.991433	1.05094	0.974502	1.0121	1.05605	0.96816	-0.111373
1041	40	0	Los Patos	1.16367	0.970022	1.00117	1.1022	1.04317	1.07593	0.747999	0.991433	1.05094	0.974502	1.0121	1.05605	0.96816	-0.111373
1042	110	0	Los Patos	1.16367	0.970022	1.00117	1.1022	1.04317	1.07593	0.747999	0.991433	1.05094	0.974502	1.0121	1.05605	0.96816	-0.111373
1043	30	0	Los Patos	1.16367	0.970022	1.00117	1.1022	1.04317	1.07593	0.747999	0.991433	1.05094	0.974502	1.0121	1.05605	0.96816	-0.111373
1044	30	0	Los Patos	1.16367	0.970022	1.00117	1.1022	1.04317	1.07593	0.747999	0.991433	1.05094	0.974502	1.0121	1.05605	0.96816	-0.111373
1045	40	0	Los Patos	1.16367	0.970022	1.00117	1.1022	1.04317	1.07593	0.747999	0.991433	1.05094	0.974502	1.0121	1.05605	0.96816	-0.111373
1046	140	1	Los Patos	1.16367	0.970022	1.00117	1.1022	1.04317	1.07593	0.747999	0.991433	1.05094	0.974502	1.0121	1.05605	0.96816	-0.111373
1047	40	0	Los Patos	1.16367	0.970022	1.00117	1.1022	1.04317	1.07593	0.747999	0.991433	1.05094	0.974502	1.0121	1.05605	0.96816	-0.111373
1048	50	0	Los Patos	1.16367	0.970022	1.00117	1.1022	1.04317	1.07593	0.747999	0.991433	1.05094	0.974502	1.0121	1.05605	0.96816	-0.111373
1049	80	1	Los Patos	1.16367	0.970022	1.00117	1.1022	1.04317	1.07593	0.747999	0.991433	1.05094	0.974502	1.0121	1.05605	0.96816	-0.111373
1050	20	0	Los Patos	1.16367	0.970022	1.00117	1.1022	1.04317	1.07593	0.747999	0.991433	1.05094	0.974502	1.0121	1.05605	0.96816	-0.111373
1051	60	0	Los Patos	1.16367	0.970022	1.00117	1.1022	1.04317	1.07593	0.747999	0.991433	1.05094	0.974502	1.0121	1.05605	0.96816	-0.111373
1052	90	0	Los Patos	1.16367	0.970022	1.00117	1.1022	1.04317	1.07593	0.747999	0.991433	1.05094	0.974502	1.0121	1.05605	0.96816	-0.111373
1053	20	0	Los Patos	1.16367	0.970022	1.00117	1.1022	1.04317	1.07593	0.747999	0.991433	1.05094	0.974502	1.0121	1.05605	0.96816	-0.111373
1054	20	0	Los Patos	1.16367	0.970022	1.00117	1.1022	1.04317	1.07593	0.747999	0.991433	1.05094	0.974502	1.0121	1.05605	0.96816	-0.111373
1055	35	0	Los Patos	1.16367	0.970022	1.00117	1.1022	1.04317	1.07593	0.747999	0.991433	1.05094	0.974502	1.0121	1.05605	0.96816	-0.111373
1056	30	0	Los Patos	1.16367	0.970022	1.00117	1.1022	1.04317	1.07593	0.747999	0.991433	1.05094	0.974502	1.0121	1.05605	0.96816	-0.111373
1057	60	0	Los Patos	1.16367	0.970022	1.00117	1.1022	1.04317	1.07593	0.747999	0.991433	1.05094	0.974502	1.0121	1.05605	0.96816	-0.111373
1058	80	1	Los Patos	1.16367	0.970022	1.00117	1.1022	1.04317	1.07593	0.747999	0.991433	1.05094	0.974502	1.0121	1.05605	0.96816	-0.111373
1059	68	1	Los Patos	1.16367	0.970022	1.00117	1.1022	1.04317	1.07593	0.747999	0.991433	1.05094	0.974502	1.0121	1.05605	0.96816	-0.111373
1060	10	0	Los Patos	1.16367	0.970022	1.00117	1.1022	1.04317	1.07593	0.747999	0.991433	1.05094	0.974502	1.0121	1.05605	0.96816	-0.111373
1061	65	1	Los Patos	1.16367	0.970022	1.00117	1.1022	1.04317	1.07593	0.747999	0.991433	1.05094	0.974502	1.0121	1.05605	0.96816	-0.111373
1062	75	1	Los Patos	1.16367	0.970022	1.00117	1.1022	1.04317	1.07593	0.747999	0.991433	1.05094	0.974502	1.0121	1.05605	0.96816	-0.111373
1063	57	0	Los Patos	1.16367	0.970022	1.00117	1.1022	1.04317	1.07593	0.747999	0.991433	1.05094	0.974502	1.0121	1.05605	0.96816	-0.111373
1064	120	1	Los Patos	1.16367	0.970022	1.00117	1.1022	1.04317	1.07593	0.747999	0.991433	1.05094	0.974502	1.0121	1.05605	0.96816	-0.111373
1065	70	1	Los Patos	1.16367	0.970022	1.00117	1.1022	1.04317	1.07593	0.747999	0.991433	1.05094	0.974502	1.0121	1.05605	0.96816	-0.111373
1066	25	0	Los Patos	1.16367	0.970022	1.00117	1.1022	1.04317	1.07593	0.747999	0.991433	1.05094	0.974502	1.0121	1.05605	0.96816	-0.111373
1067	120	1	Los Patos	1.16367	0.970022	1.00117	1.1022	1.04317	1.07593	0.747999	0.991433	1.05094	0.974502	1.0121	1.05605	0.96816	-0.111373
1068	80	0	Los Patos	1.16367	0.970022	1.00117	1.1022	1.04317	1.07593	0.747999	0.991433	1.05094	0.974502	1.0121	1.05605	0.96816	-0.111373
1069	60	0	Los Patos	1.16367	0.970022	1.00117	1.1022	1.04317	1.07593	0.747999	0.991433	1.05094	0.974502	1.0121	1.05605	0.96816	-0.111373
1070	90	0	Los Patos	1.16367	0.970022	1.00117	1.1022	1.04317	1.07593	0.747999	0.991433	1.05094	0.974502	1.0121	1.05605	0.96816	-0.111373
1071	140	0	Los Patos	1.16367	0.970022	1.00117	1.1022	1.04317	1.07593	0.747999	0.991433	1.05094	0.974502	1.0121	1.05605	0.96816	-0.111373
1072	130	0	Los Patos	1.16367	0.970022	1.00117	1.1022	1.04317	1.07593	0.747999	0.991433	1.05094	0.974502	1.0121	1.05605	0.96816	-0.111373
1073	80	0	Los Patos	1.16367	0.970022	1.00117	1.1022	1.04317	1.07593	0.747999	0.991433	1.05094	0.974502	1.0121	1.05605	0.96816	-0.111373
1074	40	0	Los Patos	1.16367	0.970022	1.00117	1.1022	1.04317	1.07593	0.747999	0.991433	1.05094	0.974502	1.0121	1.05605	0.96816	-0.111373
1075	30	0	Los Patos	1.16367	0.970022	1.00117	1.1022	1.04317	1.07593	0.747999	0.991433	1.05094	0.974502	1.0121	1.05605	0.96816	-0.111373
1076	70	0	Los Patos	1.16367	0.970022	1.00117	1.1022	1.04317	1.07593	0.747999	0.991433	1.05094	0.974502	1.0121	1.05605	0.96816	-0.111373
1077	70	1	Los Patos	1.16367	0.970022	1.00117	1.1022	1.04317	1.07593	0.747999	0.991433	1.05094	0.974502	1.0121	1.05605	0.96816	-0.111373
1078	20	0	Los Patos	1.16367	0.970022	1.00117	1.1022	1.04317	1.07593	0.747999	0.991433	1.05094	0.974502	1.0121	1.05605	0.96816	-0.111373
1079	70	1	Los Patos	1.16367	0.970022	1.00117	1.1022	1.04317	1.07593	0.747999	0.991433	1.05094	0.974502	1.0121	1.05605	0.96816	-0.111373
1080	70	0	Los Patos	1.16367	0.970022	1.00117	1.1022	1.04317	1.07593	0.747999	0.991433	1.05094	0.974502	1.0121	1.05605	0.96816	-0.111373
1081	90	0	Los Patos	1.16367	0.970022	1.00117	1.1022	1.04317	1.07593	0.747999	0.991433	1.05094	0.974502	1.0121	1.05605	0.96816	-0.111373
1082	70	0	Los Patos	1.16367	0.970022	1.00117	1.1022	1.04317	1.07593	0.747999	0.991433	1.05094	0.974502	1.0121	1.05605	0.96816	-0.111373
1083	60	0	Los Patos	1.16367	0.970022	1.00117	1.1022	1.04317	1.07593	0.747999	0.991433	1.05094	0.974502	1.0121	1.05605	0.96816	-0.111373
1084	30	0	Los Patos	1.16367	0.970022	1.00117	1.1022	1.04317	1.07593	0.747999	0.991433	1.05094	0.974502	1.0121	1.05605	0.96816	-0.111373
1085	110	0	Los Patos	1.16367	0.970022	1.00117	1.1022	1.04317	1.07593	0.747999	0.991433	1.05094	0.974502	1.0121	1.05605	0.96816	-0.111373
1086	40	0	Los Patos	1.16367	0.970022	1.00117	1.1022	1.04317	1.07593	0.747999	0.991433	1.05094	0.974502	1.0121	1.05605	0.96816	-0.111373
1087	70	0	Los Patos	1.16367	0.970022	1.00117	1.1022	1.04317	1.07593	0.747999	0.991433	1.05094	0.974502	1.0121	1.05605	0.96816	-0.111373
1088	60	0	Los Patos	1.16367	0.970022	1.00117	1.1022	1.04317	1.07593	0.747999	0.991433	1.05094	0.974502	1.0121	1.05605	0.96816	-0.111373
1089	50	0	Los Patos	1.16367	0.970022	1.00117	1.1022	1.04317	1.07593	0.747999	0.991433	1.05094	0.974502	1.0121	1.05605	0.96816	-0.111373
1090	70	0	Los Patos	1.16367	0.970022	1.00117	1.1022	1.04317	1.07593	0.747999	0.991433	1.05094	0.974502	1.0121	1.05605	0.96816	-0.111373
1091	100	0	Los Patos	1.16367	0.970022	1.00117	1.1022	1.04317	1.07593	0.747999	0.991433	1.05094	0.974502	1.0121	1.05605	0.96816	-0.111373
1092	110	0	Los Patos	1.16367	0.970022	1.00117	1.1022	1.04317	1.07593	0.747999	0.991433	1.05094	0.974502	1.0121	1.05605	0.96816	-0.111373
1093	100	0	Los Patos	1.16367	0.970022	1.00117	1.1022	1.04317	1.07593	0.747999	0.991433	1.05094	0.974502	1.0121	1.05605	0.96816	-0.111373
1094	40	0	Los Patos	1.16367	0.970022	1.00117	1.1022	1.04317	1.07593	0.747999	0.991433	1.05094	0.974502	1.0121	1.05605	0.96816	-0.111373
1095	25	0	Los Patos	1.16367	0.970022	1.00117	1.1022	1.04317	1.07593	0.747999	0.991433	1.05094	0.974502	1.0121	1.05605	0.96816	-0.111373
1096	50	0	Los Patos	1.16367	0.970022	1.00117	1.1022	1.04317	1.07593	0.747999	0.991433	1.05094	0.974502	1.0121	1.05605	0.96816	-0.111373
1097	50	0	Los Patos	1.16367	0.970022	1.00117	1.1022	1.04317	1.07593	0.747999	0.991433	1.05094	0.974502	1.0121	1.05605	0.96816	-0.111373
1098	40	0	Los Patos	1.16367	0.970022	1.00117	1.1022	1.04317	1.07593	0.747999	0.991433	1.05094	0.974502	1.0121	1.05605	0.96816	-0.111373
1099	30	0	Los Patos	1.16367	0.970022	1.00117	1.1022	1.04317	1.07593	0.747999	0.991433	1.05094	0.974502	1.0121	1.05605	0.96816	-0.111373
1100	80	0	Los Patos	1.16367	0.970022	1.00117	1.1022	1.04317	1.07593	0.747999	0.991433	1.05094	0.974502	1.0121	1.05605	0.96816	-0.111373
1101	85	0	Los Patos	1.16367	0.970022	1.00117	1.1022	1.04317	1.07593	0.747999	0.991433	1.05094	0.974502	1.0121	1.05605	0.96816	-0.111373
1102	90	0	Los Patos	1.16367	0.970022	1.00117	1.1022	1.04317	1.07593	0.747999	0.991433	1.05094	0.974502	1.0121	1.05605	0.96816	-0.111373
1103	60	0	Los Patos	1.16367	0.970022	1.00117	1.1022	1.04317	1.07593	0.747999	0.991433	1.05094	0.974502	1.0121	1.05605	0.96816	-0.111373
1104	50	0	Los Patos	1.16367	0.970022	1.00117	1.1022	1.04317	1.07593	0.747999	0.991433	1.05094	0.974502	1.0121	1.05605	0.96816	-0.111373
1105	25	0	Los Patos	1.16367	0.970022	1.00117	1.1022	1.04317	1.07593	0.747999	0.991433	1.05094	0.974502	1.0121	1.05605	0.96816	-0.111373
1106	70	0	Los Patos	1.16367	0.970022	1.00117	1.1022	1.04317	1.07593	0.747999	0.991433	1.05094	0.974502	1.0121	1.05605	0.96816	-0.111373
1107	40	0	Los Patos	1.16367	0.970022	1.00117	1.1022	1.04317	1.07593	0.747999	0.991433	1.05094	0.974502	1.0121	1.05605	0.96816	-0.111373
1108	80	0	Los Patos	1.16367	0.970022	1.00117	1.1022	1.04317	1.07593	0.747999	0.991433	1.05094	0.974502	1.0121	1.05605	0.96816	-0.111373
1109	60	0	Los Patos	1.16367	0.970022	1.00117	1.1022	1.04317	1.07593	0.747999	0.991433	1.05094	0.974502	1.0121	1.05605	0.96816	-0.111373
1110	60	0	Los Patos	1.16367	0.970022	1.00117	1.1022	1.04317	1.07593	0.747999	0.991433	1.05094	0.974502	1.0121	1.05605	0.96816	-0.111373
1111	60	0	Los Patos	1.16367	0.970022	1.00117	1.1022	1.04317	1.07593	0.747999	0.991433	1.05094	0.974502	1.0121	1.05605	0.96816	-0.111373
1112	35	0	Los Patos	1.16367	0.970022	1.00117	1.1022	1.04317	1.07593	0.747999	0.991433	1.05094	0.974502	1.0121	1.05605	0.96816	-0.111373
1113	80	1	Los Patos	1.16367	0.970022	1.00117	1.1022	1.04317	1.07593	0.747999	0.991433	1.05094	0.974502	1.0121	1.05605	0.96816	-0.111373
1114	50	0	Los Patos	1.16367	0.970022	1.00117	1.1022	1.04317	1.07593	0.747999	0.991433	1.05094	0.974502	1.0121	1.05605	0.96816	-0.111373
1115	90	0	Los Patos	1.16367	0.970022	1.00117	1.1022	1.04317	1.07593	0.747999	0.991433	1.05094	0.974502	1.0121	1.05605	0.96816	-0.111373
1116	50	0	Los Patos	1.16367	0.970022	1.00117	1.1022	1.04317	1.07593	0.747999	0.991433	1.05094	0.974502	1.0121	1.05605	0.96816	-0.111373
1117	50	0	Los Patos	1.16367	0.970022	1.00117	1.1022	1.04317	1.07593	0.747999	0.991433	1.05094	0.974502	1.0121	1.05605	0.96816	-0.111373
1118	20	0	Los Patos	1.16367	0.970022	1.00117	1.1022	1.04317	1.07593	0.747999	0.991433	1.05094	0.974502	1.0121	1.05605	0.96816	-0.111373
1119	55	0	Los Patos	1.16367	0.970022	1.00117	1.1022	1.04317	1.07593	0.747999	0.991433	1.05094	0.974502	1.0121	1.05605	0.96816	-0.111373
1120	60	1	Los Patos	1.16367	0.970022	1.00117	1.1022	1.04317	1.07593	0.747999	0.991433	1.05094	0.974502	1.0121	1.05605	0.96816	-0.111373
1121	40	0	Los Patos	1.16367	0.970022	1.00117	1.1022	1.04317	1.07593	0.747999	0.991433	1.05094	0.974502	1.0121	1.05605	0.96816	-0.111373
1122	100	0	Los Patos	1.16367	0.970022	1.00117	1.1022	1.04317	1.07593	0.747999	0.991433	1.05094	0.974502	1.0121	1.05605	0.96816	-0.111373
1123	20	0	Los Patos	1.16367	0.970022	1.00117	1.1022	1.04317	1.07593	0.747999	0.991433	1.05094	0.974502	1.0121	1.05605	0.96816	-0.111373
1124	70	0	Los Patos	1.16367	0.970022	1.00117	1.1022	1.04317	1.07593	0.747999	0.991433	1.05094	0.974502	1.0121	1.05605	0.96816	-0.111373
1125	80	0	Los Patos	1.16367	0.970022	1.00117	1.1022	1.04317	1.07593	0.747999	0.991433	1.05094	0.974502	1.0121	1.05605	0.96816	-0.111373
1126	65	0	Los Patos	1.16367	0.970022	1.00117	1.1022	1.04317	1.07593	0.747999	0.991433	1.05094	0.974502	1.0121	1.05605	0.96816	-0.111373
1127	20	0	Los Patos	1.16367	0.970022	1.00117	1.1022	1.04317	1.07593	0.747999	0.991433	1.05094	0.974502	1.0121	1.05605	0.96816	-0.111373
1128	50	0	Los Patos	1.16367	0.970022	1.00117	1.1022	1.04317	1.07593	0.747999	0.991433	1.05094	0.974502	1.0121	1.05605	0.96816	-0.111373
1129	60	0	Los Patos	1.16367	0.970022	1.00117	1.1022	1.04317	1.07593	0.747999	0.991433	1.05094	0.974502	1.0121	1.05605	0.96816	-0.111373
1130	40	0	Los Patos	1.16367	0.970022	1.00117	1.1022	1.04317	1.07593	0.747999	0.991433	1.05094	0.974502	1.0121	1.05605	0.96816	-0.111373
1131	15	0	Los Patos	1.16367	0.970022	1.00117	1.1022	1.04317	1.07593	0.747999	0.991433	1.05094	0.974502	1.0121	1.05605	0.96816	-0.111373
1132	10	0	Los Patos	1.16367	0.970022	1.00117	1.1022	1.04317	1.07593	0.747999	0.991433	1.05094	0.974502	1.0121	1.05605	0.96816	-0.111373
1133	70	0	Los Patos	1.16367	0.970022	1.00117	1.1022	1.04317	1.07593	0.747999	0.991433	1.05094	0.974502	1.0121	1.05605	0.96816	-0.111373
1134	40	0	Los Patos	1.16367	0.970022	1.00117	1.1022	1.04317	1.07593	0.747999	0.991433	1.05094	0.974502	1.0121	1.05605	0.96816	-0.111373
1135	50	0	Los Patos	1.16367	0.970022	1.00117	1.1022	1.04317	1.07593	0.747999	0.991433	1.05094	0.974502	1.0121	1.05605	0.96816	-0.111373
1136	50	0	Los Patos	1.16367	0.970022	1.00117	1.1022	1.04317	1.07593	0.747999	0.991433	1.05094	0.974502	1.0121	1.05605	0.96816	-0.111373
1137	40	0	Los Patos	1.16367	0.970022	1.00117	1.1022	1.04317	1.07593	0.747999	0.991433	1.05094	0.974502	1.0121	1.05605	0.96816	-0.111373
1138	55	0	Los Patos	1.16367	0.970022	1.00117	1.1022	1.04317	1.07593	0.747999	0.991433	1.05094	0.974502	1.0121	1.05605	0.96816	-0.111373
1139	15	0	Los Patos	1.16367	0.970022	1.00117	1.1022	1.04317	1.07593	0.747999	0.991433	1.05094	0.974502	1.0121	1.05605	0.96816	-0.111373
1140	20	0	Los Patos	1.16367	0.970022	1.00117	1.1022	1.04317	1.07593	0.747999	0.991433	1.05094	0.974502	1.0121	1.05605	0.96816	-0.111373
1141	10	0	Los Patos	1.16367	0.970022	1.00117	1.1022	1.04317	1.07593	0.747999	0.991433	1.05094	0.974502	1.0121	1.05605	0.96816	-0.111373
1142	10	0	Los Patos	1.16367	0.970022	1.00117	1.1022	1.04317	1.07593	0.747999	0.991433	1.05094	0.974502	1.0121	1.05605	0.96816	-0.111373
1143	90	0	Los Patos	1.16367	0.970022	1.00117	1.1022	1.04317	1.07593	0.747999	0.991433	1.05094	0.974502	1.0121	1.05605	0.96816	-0.111373
1144	50	0	Los Patos	1.16367	0.970022	1.00117	1.1022	1.04317	1.07593	0.747999	0.991433	1.05094	0.974502	1.0121	1.05605	0.96816	-0.111373
1145	90	0	Los Patos	1.16367	0.970022	1.00117	1.1022	1.04317	1.07593	0.747999	0.991433	1.05094	0.974502	1.0121	1.05605	0.96816	-0.111373
1146	45	0	Los Patos	1.16367	0.970022	1.00117	1.1022	1.04317	1.07593	0.747999	0.991433	1.05094	0.974502	1.0121	1.05605	0.96816	-0.111373
1147	60	0	Los Patos	1.16367	0.970022	1.00117	1.1022	1.04317	1.07593	0.747999	0.991433	1.05094	0.974502	1.0121	1.05605	0.96816	-0.111373
1148	70	0	Los Patos	1.16367	0.970022	1.00117	1.1022	1.04317	1.07593	0.747999	0.991433	1.05094	0.974502	1.0121	1.05605	0.96816	-0.111373
1149	30	0	Los Patos	1.16367	0.970022	1.00117	1.1022	1.04317	1.07593	0.747999	0.991433	1.05094	0.974502	1.0121	1.05605	0.96816	-0.111373
1150	16	0	Los Patos	1.16367	0.970022	1.00117	1.1022	1.04317	1.07593	0.747999	0.991433	1.05094	0.974502	1.0121	1.05605	0.96816	-0.111373
1151	15	0	Los Patos	1.16367	0.970022	1.00117	1.1022	1.04317	1.07593	0.747999	0.991433	1.05094	0.974502	1.0121	1.05605	0.96816	-0.111373
1152	30	0	Los Patos	1.16367	0.970022	1.00117	1.1022	1.04317	1.07593	0.747999	0.991433	1.05094	0.974502	1.0121	1.05605	0.96816	-0.111373
1153	40	0	Los Patos	1.16367	0.970022	1.00117	1.1022	1.04317	1.07593	0.747999	0.991433	1.05094	0.974502	1.0121	1.05605	0.96816	-0.111373
1154	100	0	Los Patos	1.16367	0.970022	1.00117	1.1022	1.04317	1.07593	0.747999	0.991433	1.05094	0.974502	1.0121	1.05605	0.96816	-0.111373
1155	65	1	Los Patos	1.16367	0.970022	1.00117	1.1022	1.04317	1.07593	0.747999	0.991433	1.05094	0.974502	1.0121	1.05605	0.96816	-0.111373
1156	35	0	Los Patos	1.16367	0.970022	1.00117	1.1022	1.04317	1.07593	0.747999	0.991433	1.05094	0.974502	1.0121	1.05605	0.96816	-0.111373
1157	60	1	Los Patos	1.16367	0.970022	1.00117	1.1022	1.04317	1.07593	0.747999	0.991433	1.05094	0.974502	1.0121	1.05605	0.96816	-0.111373
1158	80	1	Los Patos	1.16367	0.970022	1.00117	1.1022	1.04317	1.07593	0.747999	0.991433	1.05094	0.974502	1.0121	1.05605	0.96816	-0.111373
1159	30	0	Los Patos	1.16367	0.970022	1.00117	1.1022	1.04317	1.07593	0.747999	0.991433	1.05094	0.974502	1.0121	1.05605	0.96816	-0.111373
1160	15	0	Los Patos	1.16367	0.970022	1.00117	1.1022	1.04317	1.07593	0.747999	0.991433	1.05094	0.974502	1.0121	1.05605	0.96816	-0.111373
1161	70	1	Los Patos	1.16367	0.970022	1.00117	1.1022	1.04317	1.07593	0.747999	0.991433	1.05094	0.974502	1.0121	1.05605	0.96816	-0.111373
1162	10	0	Los Patos	1.16367	0.970022	1.00117	1.1022	1.04317	1.07593	0.747999	0.991433	1.05094	0.974502	1.0121	1.05605	0.96816	-0.111373
1163	40	0	Los Patos	1.16367	0.970022	1.00117	1.1022	1.04317	1.07593	0.747999	0.991433	1.05094	0.974502	1.0121	1.05605	0.96816	-0.111373
1164	45	0	Los Patos	1.16367	0.970022	1.00117	1.1022	1.04317	1.07593	0.747999	0.991433	1.05094	0.974502	1.0121	1.05605	0.96816	-0.111373
1165	47	0	Los Patos	1.16367	0.970022	1.00117	1.1022	1.04317	1.07593	0.747999	0.991433	1.05094	0.974502	1.0121	1.05605	0.96816	-0.111373
1166	105	0	Los Patos	1.16367	0.970022	1.00117	1.1022	1.04317	1.07593	0.747999	0.991433	1.05094	0.974502	1.0121	1.05605	0.96816	-0.111373
1167	55	0	Los Patos	1.16367	0.970022	1.00117	1.1022	1.04317	1.07593	0.747999	0.991433	1.05094	0.974502	1.0121	1.05605	0.96816	-0.111373
1168	30	0	Los Patos	1.16367	0.970022	1.00117	1.1022	1.04317	1.07593	0.747999	0.991433	1.05094	0.974502	1.0121	1.05605	0.96816	-0.111373
1169	15	0	Los Patos	1.16367	0.970022	1.00117	1.1022	1.04317	1.07593	0.747999	0.991433	1.05094	0.974502	1.0121	1.05605	0.96816	-0.111373
1170	40	0	Los Patos	1.16367	0.970022	1.00117	1.1022	1.04317	1.07593	0.747999	0.991433	1.05094	0.974502	1.0121	1.05605	0.96816	-0.111373
1171	70	0	Los Patos	1.16367	0.970022	1.00117	1.1022	1.04317	1.07593	0.747999	0.991433	1.05094	0.974502	1.0121	1.05605	0.96816	-0.111373
1172	50	0	Los Patos	1.16367	0.970022	1.00117	1.1022	1.04317	1.07593	0.747999	0.991433	1.05094	0.974502	1.0121	1.05605	0.96816	-0.111373
1173	40	0	Los Patos	1.16367	0.970022	1.00117	1.1022	1.04317	1.07593	0.747999	0.991433	1.05094	0.974502	1.0121	1.05605	0.96816	-0.111373
1174	40	0	Los Patos	1.16367	0.970022	1.00117	1.1022	1.04317	1.07593	0.747999	0.991433	1.05094	0.974502	1.0121	1.05605	0.96816	-0.111373
1175	40	0	Los Patos	1.16367	0.970022	1.00117	1.1022	1.04317	1.07593	0.747999	0.991433	1.05094	0.974502	1.0121	1.05605	0.96816	-0.111373
1176	20	0	Los Patos	1.16367	0.970022	1.00117	1.1022	1.04317	1.07593	0.747999	0.991433	1.05094	0.974502	1.0121	1.05605	0.96816	-0.111373
1177	90	0	Los Patos	1.16367	0.970022	1.00117	1.1022	1.04317	1.07593	0.747999	0.991433	1.05094	0.974502	1.0121	1.05605	0.96816	-0.111373
1178	70	0	Los Patos	1.16367	0.970022	1.00117	1.1022	1.04317	1.07593	0.747999	0.991433	1.05094	0.974502	1.0121	1.05605	0.96816	-0.111373
1179	15	0	Los Patos	1.16367	0.970022	1.00117	1.1022	1.04317	1.07593	0.747999	0.991433	1.05094	0.974502	1.0121	1.05605	0.96816	-0.111373
1180	40	0	Los Patos	1.16367	0.970022	1.00117	1.1022	1.04317	1.07593	0.747999	0.991433	1.05094	0.974502	1.0121	1.05605	0.96816	-0.111373
1181	40	0	Los Patos	1.16367	0.970022	1.00117	1.1022	1.04317	1.07593	0.747999	0.991433	1.05094	0.974502	1.0121	1.05605	0.96816	-0.111373
1182	50	0	Los Patos	1.16367	0.970022	1.00117	1.1022	1.04317	1.07593	0.747999	0.991433	1.05094	0.974502	1.0121	1.05605	0.96816	-0.111373
1183	25	0	Los Patos	1.16367	0.970022	1.00117	1.1022	1.04317	1.07593	0.747999	0.991433	1.05094	0.974502	1.0121	1.05605	0.96816	-0.111373
1184	80	1	Los Patos	1.16367	0.970022	1.00117	1.1022	1.04317	1.07593	0.747999	0.991433	1.05094	0.974502	1.0121	1.05605	0.96816	-0.111373
1185	50	0	Los Patos	1.16367	0.970022	1.00117	1.1022	1.04317	1.07593	0.747999	0.991433	1.05094	0.974502	1.0121	1.05605	0.96816	-0.111373
1186	25	0	Los Patos	1.16367	0.970022	1.00117	1.1022	1.04317	1.07593	0.747999	0.991433	1.05094	0.974502	1.0121	1.05605	0.96816	-0.111373
1187	15	0	Los Patos	1.16367	0.970022	1.00117	1.1022	1.04317	1.07593	0.747999	0.991433	1.05094	0.974502	1.0121	1.05605	0.96816	-0.111373
1188	40	0	Los Patos	1.16367	0.970022	1.00117	1.1022	1.04317	1.07593	0.747999	0.991433	1.05094	0.974502	1.0121	1.05605	0.96816	-0.111373
1189	20	0	Los Patos	1.16367	0.970022	1.00117	1.1022	1.04317	1.07593	0.747999	0.991433	1.05094	0.974502	1.0121	1.05605	0.96816	-0.111373
1190	20	0	Los Patos	1.16367	0.970022	1.00117	1.1022	1.04317	1.07593	0.747999	0.991433	1.05094	0.974502	1.0121	1.05605	0.96816	-0.111373
1191	30	0	Los Patos	1.16367	0.970022	1.00117	1.1022	1.04317	1.07593	0.747999	0.991433	1.05094	0.974502	1.0121	1.05605	0.96816	-0.111373
1192	60	0	Los Patos	1.16367	0.970022	1.00117	1.1022	1.04317	1.07593	0.747999	0.991433	1.05094	0.974502	1.0121	1.05605	0.96816	-0.111373
1193	80	1	Los Patos	1.16367	0.970022	1.00117	1.1022	1.04317	1.07593	0.747999	0.991433	1.05094	0.974502	1.0121	1.05605	0.96816	-0.111373
1194	35	0	Los Patos	1.16367	0.970022	1.00117	1.1022	1.04317	1.07593	0.747999	0.991433	1.05094	0.974502	1.0121	1.05605	0.96816	-0.111373
1195	120	0	Los Patos	1.16367	0.970022	1.00117	1.1022	1.04317	1.07593	0.747999	0.991433	1.05094	0.974502	1.0121	1.05605	0.96816	-0.111373
1196	40	1	Los Patos	1.16367	0.970022	1.00117	1.1022	1.04317	1.07593	0.747999	0.991433	1.05094	0.974502	1.0121	1.05605	0.96816	-0.111373
1197	80	0	Los Patos	1.16367	0.970022	1.00117	1.1022	1.04317	1.07593	0.747999	0.991433	1.05094	0.974502	1.0121	1.05605	0.96816	-0.111373
1198	110	1	Los Patos	1.16367	0.970022	1.00117	1.1022	1.04317	1.07593	0.747999	0.991433	1.05094	0.974502	1.0121	1.05605	0.96816	-0.111373
1199	90	0	Los Patos	1.16367	0.970022	1.00117	1.1022	1.04317	1.07593	0.747999	0.991433	1.05094	0.974502	1.0121	1.05605	0.96816	-0.111373
1200	80	1	Los Patos	1.16367	0.970022	1.00117	1.1022	1.04317	1.07593	0.747999	0.991433	1.05094	0.974502	1.0121	1.05605	0.96816	-0.111373
1201	80	1	Los Patos	1.16367	0.970022	1.00117	1.1022	1.04317	1.07593	0.747999	0.991433	1.05094	0.974502	1.0121	1.05605	0.96816	-0.111373
1202	40	1	Los Patos	1.16367	0.970022	1.00117	1.1022	1.04317	1.07593	0.747999	0.991433	1.05094	0.974502	1.0121	1.05605	0.96816	-0.111373
1203	50	1	Los Patos	1.16367	0.970022	1.00117	1.1022	1.04317	1.07593	0.747999	0.991433	1.05094	0.974502	1.0121	1.05605	0.96816	-0.111373
1204	90	1	Los Patos	1.16367	0.970022	1.00117	1.1022	1.04317	1.07593	0.747999	0.991433	1.05094	0.974502	1.0121	1.05605	0.96816	-0.111373
1205	110	1	Los Patos	1.16367	0.970022	1.00117	1.1022	1.04317	1.07593	0.747999	0.991433	1.05094	0.974502	1.0121	1.05605	0.96816	-0.111373
1206	80	0	Los Patos	1.16367	0.970022	1.00117	1.1022	1.04317	1.07593	0.747999	0.991433	1.05094	0.974502	1.0121	1.05605	0.96816	-0.111373
1207	40	0	Los Patos	1.16367	0.970022	1.00117	1.1022	1.04317	1.07593	0.747999	0.991433	1.05094	0.974502	1.0121	1.05605	0.96816	-0.111373
1208	100	1	Los Patos	1.16367	0.970022	1.00117	1.1022	1.04317	1.07593	0.747999	0.991433	1.05094	0.974502	1.0121	1.05605	0.96816	-0.111373
1209	60	1	Los Patos	1.16367	0.970022	1.00117	1.1022	1.04317	1.07593	0.747999	0.991433	1.05094	0.974502	1.0121	1.05605	0.96816	-0.111373
1210	40	0	Los Patos	1.16367	0.970022	1.00117	1.1022	1.04317	1.07593	0.747999	0.991433	1.05094	0.974502	1.0121	1.05605	0.96816	-0.111373
1211	15	0	Los Patos	1.16367	0.970022	1.00117	1.1022	1.04317	1.07593	0.747999	0.991433	1.05094	0.974502	1.0121	1.05605	0.96816	-0.111373
1212	70	0	Los Patos	1.16367	0.970022	1.00117	1.1022	1.04317	1.07593	0.747999	0.991433	1.05094	0.974502	1.0121	1.05605	0.96816	-0.111373
1213	60	0	Los Patos	1.16367	0.970022	1.00117	1.1022	1.04317	1.07593	0.747999	0.991433	1.05094	0.974502	1.0121	1.05605	0.96816	-0.111373
1214	55	0	Los Patos	1.16367	0.970022	1.00117	1.1022	1.04317	1.07593	0.747999	0.991433	1.05094	0.974502	1.0121	1.05605	0.96816	-0.111373
1215	90	1	Los Patos	1.16367	0.970022	1.00117	1.1022	1.04317	1.07593	0.747999	0.991433	1.05094	0.974502	1.0121	1.05605	0.96816	-0.111373
1216	30	0	Los Patos	1.16367	0.970022	1.00117	1.1022	1.04317	1.07593	0.747999	0.991433	1.05094	0.974502	1.0121	1.05605	0.96816	-0.111373
1217	40	0	Los Patos	1.16367	0.970022	1.00117	1.1022	1.04317	1.07593	0.747999	0.991433	1.05094	0.974502	1.0121	1.05605	0.96816	-0.111373
1218	110	1	Los Patos	1.16367	0.970022	1.00117	1.1022	1.04317	1.07593	0.747999	0.991433	1.05094	0.974502	1.0121	1.05605	0.96816	-0.111373
1219	70	1	Los Patos	1.16367	0.970022	1.00117	1.1022	1.04317	1.07593	0.747999	0.991433	1.05094	0.974502	1.0121	1.05605	0.96816	-0.111373
1220	120	1	Los Patos	1.16367	0.970022	1.00117	1.1022	1.04317	1.07593	0.747999	0.991433	1.05094	0.974502	1.0121	1.05605	0.96816	-0.111373
1221	30	0	Los Patos	1.16367	0.970022	1.00117	1.1022	1.04317	1.07593	0.747999	0.991433	1.05094	0.974502	1.0121	1.05605	0.96816	-0.111373
1222	60	0	Los Patos	1.16367	0.970022	1.00117	1.1022	1.04317	1.07593	0.747999	0.991433	1.05094	0.974502	1.0121	1.05605	0.96816	-0.111373
1223	90	1	Los Patos	1.16367	0.970022	1.00117	1.1022	1.04317	1.07593	0.747999	0.991433	1.05094	0.974502	1.0121	1.05605	0.96816	-0.111373
1224	25	0	Los Patos	1.16367	0.970022	1.00117	1.1022	1.04317	1.07593	0.747999	0.991433	1.05094	0.974502	1.0121	1.05605	0.96816	-0.111373
1225	30	0	Los Patos	1.16367	0.970022	1.00117	1.1022	1.04317	1.07593	0.747999	0.991433	1.05094	0.974502	1.0121	1.05605	0.96816	-0.111373
1226	70	0	Los Patos	1.16367	0.970022	1.00117	1.1022	1.04317	1.07593	0.747999	0.991433	1.05094	0.974502	1.0121	1.05605	0.96816	-0.111373
1227	50	0	Los Patos	1.16367	0.970022	1.00117	1.1022	1.04317	1.07593	0.747999	0.991433	1.05094	0.974502	1.0121	1.05605	0.96816	-0.111373
1228	40	0	Los Patos	1.16367	0.970022	1.00117	1.1022	1.04317	1.07593	0.747999	0.991433	1.05094	0.974502	1.0121	1.05605	0.96816	-0.111373
1229	70	1	Los Patos	1.16367	0.970022	1.00117	1.1022	1.04317	1.07593	0.747999	0.991433	1.05094	0.974502	1.0121	1.05605	0.96816	-0.111373
1230	20	0	Los Patos	1.16367	0.970022	1.00117	1.1022	1.04317	1.07593	0.747999	0.991433	1.05094	0.974502	1.0121	1.05605	0.96816	-0.111373
1231	120	1	Los Patos	1.16367	0.970022	1.00117	1.1022	1.04317	1.07593	0.747999	0.991433	1.05094	0.974502	1.0121	1.05605	0.96816	-0.111373
1232	70	0	Los Patos	1.16367	0.970022	1.00117	1.1022	1.04317	1.07593	0.747999	0.991433	1.05094	0.974502	1.0121	1.05605	0.96816	-0.111373
1233	70	0	Los Patos	1.16367	0.970022	1.00117	1.1022	1.04317	1.07593	0.747999	0.991433	1.05094	0.974502	1.0121	1.05605	0.96816	-0.111373
1234	60	0	Los Patos	1.16367	0.970022	1.00117	1.1022	1.04317	1.07593	0.747999	0.991433	1.05094	0.974502	1.0121	1.05605	0.96816	-0.111373
1235	80	0	Los Patos	1.16367	0.970022	1.00117	1.1022	1.04317	1.07593	0.747999	0.991433	1.05094	0.974502	1.0121	1.05605	0.96816	-0.111373
1236	80	1	Los Patos	1.16367	0.970022	1.00117	1.1022	1.04317	1.07593	0.747999	0.991433	1.05094	0.974502	1.0121	1.05605	0.96816	-0.111373
1237	20	0	Los Patos	1.16367	0.970022	1.00117	1.1022	1.04317	1.07593	0.747999	0.991433	1.05094	0.974502	1.0121	1.05605	0.96816	-0.111373
1238	50	0	Los Patos	1.16367	0.970022	1.00117	1.1022	1.04317	1.07593	0.747999	0.991433	1.05094	0.974502	1.0121	1.05605	0.96816	-0.111373
1239	70	0	Los Patos	1.16367	0.970022	1.00117	1.1022	1.04317	1.07593	0.747999	0.991433	1.05094	0.974502	1.0121	1.05605	0.96816	-0.111373
1240	60	0	Los Patos	1.16367	0.970022	1.00117	1.1022	1.04317	1.07593	0.747999	0.991433	1.05094	0.974502	1.0121	1.05605	0.96816	-0.111373
1241	120	1	Los Patos	1.16367	0.970022	1.00117	1.1022	1.04317	1.07593	0.747999	0.991433	1.05094	0.974502	1.0121	1.05605	0.96816	-0.111373
1242	80	0	Los Patos	1.16367	0.970022	1.00117	1.1022	1.04317	1.07593	0.747999	0.991433	1.05094	0.974502	1.0121	1.05605	0.96816	-0.111373
1243	45	0	Los Patos	1.16367	0.970022	1.00117	1.1022	1.04317	1.07593	0.747999	0.991433	1.05094	0.974502	1.0121	1.05605	0.96816	-0.111373
1244	80	1	Los Patos	1.16367	0.970022	1.00117	1.1022	1.04317	1.07593	0.747999	0.991433	1.05094	0.974502	1.0121	1.05605	0.96816	-0.111373
1245	30	0	Los Patos	1.16367	0.970022	1.00117	1.1022	1.04317	1.07593	0.747999	0.991433	1.05094	0.974502	1.0121	1.05605	0.96816	-0.111373
1246	30	0	Los Patos	1.16367	0.970022	1.00117	1.1022	1.04317	1.07593	0.747999	0.991433	1.05094	0.974502	1.0121	1.05605	0.96816	-0.111373
1247	60	0	Los Patos	1.16367	0.970022	1.00117	1.1022	1.04317	1.07593	0.747999	0.991433	1.05094	0.974502	1.0121	1.05605	0.96816	-0.111373
1248	50	0	Los Patos	1.16367	0.970022	1.00117	1.1022	1.04317	1.07593	0.747999	0.991433	1.05094	0.974502	1.0121	1.05605	0.96816	-0.111373
1249	80	0	Los Patos	1.16367	0.970022	1.00117	1.1022	1.04317	1.07593	0.747999	0.991433	1.05094	0.974502	1.0121	1.05605	0.96816	-0.111373
1250	40	0	Los Patos	1.16367	0.970022	1.00117	1.1022	1.04317	1.07593	0.747999	0.991433	1.05094	0.974502	1.0121	1.05605	0.96816	-0.111373
1251	50	0	Los Patos	1.16367	0.970022	1.00117	1.1022	1.04317	1.07593	0.747999	0.991433	1.05094	0.974502	1.0121	1.05605	0.96816	-0.111373
1252	60	0	Los Patos	1.16367	0.970022	1.00117	1.1022	1.04317	1.07593	0.747999	0.991433	1.05094	0.974502	1.0121	1.05605	0.96816	-0.111373
1253	20	0	Los Patos	1.16367	0.970022	1.00117	1.1022	1.04317	1.07593	0.747999	0.991433	1.05094	0.974502	1.0121	1.05605	0.96816	-0.111373
1254	50	0	Los Patos	1.16367	0.970022	1.00117	1.1022	1.04317	1.07593	0.747999	0.991433	1.05094	0.974502	1.0121	1.05605	0.96816	-0.111373
1255	60	0	Los Patos	1.16367	0.970022	1.00117	1.1022	1.04317	1.07593	0.747999	0.991433	1.05094	0.974502	1.0121	1.05605	0.96816	-0.111373
1256	60	1	Los Patos	1.16367	0.970022	1.00117	1.1022	1.04317	1.07593	0.747999	0.991433	1.05094	0.974502	1.0121	1.05605	0.96816	-0.111373
1257	10	0	Los Patos	1.16367	0.970022	1.00117	1.1022	1.04317	1.07593	0.747999	0.991433	1.05094	0.974502	1.0121	1.05605	0.96816	-0.111373
1258	25	0	Los Patos	1.16367	0.970022	1.00117	1.1022	1.04317	1.07593	0.747999	0.991433	1.05094	0.974502	1.0121	1.05605	0.96816	-0.111373
1259	50	0	Los Patos	1.16367	0.970022	1.00117	1.1022	1.04317	1.07593	0.747999	0.991433	1.05094	0.974502	1.0121	1.05605	0.96816	-0.111373
1260	50	0	Los Patos	1.16367	0.970022	1.00117	1.1022	1.04317	1.07593	0.747999	0.991433	1.05094	0.974502	1.0121	1.05605	0.96816	-0.111373
1261	40	0	Los Patos	1.16367	0.970022	1.00117	1.1022	1.04317	1.07593	0.747999	0.991433	1.05094	0.974502	1.0121	1.05605	0.96816	-0.111373
1262	40	0	Los Patos	1.16367	0.970022	1.00117	1.1022	1.04317	1.07593	0.747999	0.991433	1.05094	0.974502	1.0121	1.05605	0.96816	-0.111373
1263	40	0	Los Patos	1.16367	0.970022	1.00117	1.1022	1.04317	1.07593	0.747999	0.991433	1.05094	0.974502	1.0121	1.05605	0.96816	-0.111373
1264	20	0	Los Patos	1.16367	0.970022	1.00117	1.1022	1.04317	1.07593	0.747999	0.991433	1.05094	0.974502	1.0121	1.05605	0.96816	-0.111373
1265	120	0	Los Patos	1.16367	0.970022	1.00117	1.1022	1.04317	1.07593	0.747999	0.991433	1.05094	0.974502	1.0121	1.05605	0.96816	-0.111373
1266	120	0	Los Patos	1.16367	0.970022	1.00117	1.1022	1.04317	1.07593	0.747999	0.991433	1.05094	0.974502	1.0121	1.05605	0.96816	-0.111373
1267	40	0	Los Patos	1.16367	0.970022	1.00117	1.1022	1.04317	1.07593	0.747999	0.991433	1.05094	0.974502	1.0121	1.05605	0.96816	-0.111373
1268	40	0	Los Patos	1.16367	0.970022	1.00117	1.1022	1.04317	1.07593	0.747999	0.991433	1.05094	0.974502	1.0121	1.05605	0.96816	-0.111373
1269	40	0	Los Patos	1.16367	0.970022	1.00117	1.1022	1.04317	1.07593	0.747999	0.991433	1.05094	0.974502	1.0121	1.05605	0.96816	-0.111373
1270	50	0	Los Patos	1.16367	0.970022	1.00117	1.1022	1.04317	1.07593	0.747999	0.991433	1.05094	0.974502	1.0121	1.05605	0.96816	-0.111373
1271	100	0	Los Patos	1.16367	0.970022	1.00117	1.1022	1.04317	1.07593	0.747999	0.991433	1.05094	0.974502	1.0121	1.05605	0.96816	-0.111373
1272	80	1	Los Patos	1.16367	0.970022	1.00117	1.1022	1.04317	1.07593	0.747999	0.991433	1.05094	0.974502	1.0121	1.05605	0.96816	-0.111373
1273	80	1	Los Patos	1.16367	0.970022	1.00117	1.1022	1.04317	1.07593	0.747999	0.991433	1.05094	0.974502	1.0121	1.05605	0.96816	-0.111373
1274	80	1	Los Patos	1.16367	0.970022	1.00117	1.1022	1.04317	1.07593	0.747999	0.991433	1.05094	0.974502	1.0121	1.05605	0.96816	-0.111373
1275	90	0	Los Patos	1.16367	0.970022	1.00117	1.1022	1.04317	1.07593	0.747999	0.991433	1.05094	0.974502	1.0121	1.05605	0.96816	-0.111373
1276	90	0	Los Patos	1.16367	0.970022	1.00117	1.1022	1.04317	1.07593	0.747999	0.991433	1.05094	0.974502	1.0121	1.05605	0.96816	-0.111373
1277	80	1	Los Patos	1.16367	0.970022	1.00117	1.1022	1.04317	1.07593	0.747999	0.991433	1.05094	0.974502	1.0121	1.05605	0.96816	-0.111373
1278	80	1	Los Patos	1.16367	0.970022	1.00117	1.1022	1.04317	1.07593	0.747999	0.991433	1.05094	0.974502	1.0121	1.05605	0.96816	-0.111373
1279	90	1	Los Patos	1.16367	0.970022	1.00117	1.1022	1.04317	1.07593	0.747999	0.991433	1.05094	0.974502	1.0121	1.05605	0.96816	-0.111373
1280	90	1	Los Patos	1.16367	0.970022	1.00117	1.1022	1.04317	1.07593	0.747999	0.991433	1.05094	0.974502	1.0121	1.05605	0.96816	-0.111373
1281	90	1	Los Patos	1.16367	0.970022	1.00117	1.1022	1.04317	1.07593	0.747999	0.991433	1.05094	0.974502	1.0121	1.05605	0.96816	-0.111373
1282	90	1	Los Patos	1.16367	0.970022	1.00117	1.1022	1.04317	1.07593	0.747999	0.991433	1.05094	0.974502	1.0121	1.05605	0.96816	-0.111373
1283	90	1	Los Patos	1.16367	0.970022	1.00117	1.1022	1.04317	1.07593	0.747999	0.991433	1.05094	0.974502	1.0121	1.05605	0.96816	-0.111373
1284	90	1	Los Patos	1.16367	0.970022	1.00117	1.1022	1.04317	1.07593	0.747999	0.991433	1.05094	0.974502	1.0121	1.05605	0.96816	-0.111373
1285	90	1	Los Patos	1.16367	0.970022	1.00117	1.1022	1.04317	1.07593	0.747999	0.991433	1.05094	0.974502	1.0121	1.05605	0.96816	-0.111373
1286	80	1	Los Patos	1.16367	0.970022	1.00117	1.1022	1.04317	1.07593	0.747999	0.991433	1.05094	0.974502	1.0121	1.05605	0.96816	-0.111373
1287	40	0	Los Patos	1.16367	0.970022	1.00117	1.1022	1.04317	1.07593	0.747999	0.991433	1.05094	0.974502	1.0121	1.05605	0.96816	-0.111373
1288	60	0	Los Patos	1.16367	0.970022	1.00117	1.1022	1.04317	1.07593	0.747999	0.991433	1.05094	0.974502	1.0121	1.05605	0.96816	-0.111373
1289	8	0	Los Patos	1.16367	0.970022	1.00117	1.1022	1.04317	1.07593	0.747999	0.991433	1.05094	0.974502	1.0121	1.05605	0.96816	-0.111373
1290	100	1	Los Patos	1.16367	0.970022	1.00117	1.1022	1.04317	1.07593	0.747999	0.991433	1.05094	0.974502	1.0121	1.05605	0.96816	-0.111373
1291	100	1	Los Patos	1.16367	0.970022	1.00117	1.1022	1.04317	1.07593	0.747999	0.991433	1.05094	0.974502	1.0121	1.05605	0.96816	-0.111373
1292	90	1	Los Patos	1.16367	0.970022	1.00117	1.1022	1.04317	1.07593	0.747999	0.991433	1.05094	0.974502	1.0121	1.05605	0.96816	-0.111373
1293	90	1	Los Patos	1.16367	0.970022	1.00117	1.1022	1.04317	1.07593	0.747999	0.991433	1.05094	0.974502	1.0121	1.05605	0.96816	-0.111373
1294	80	1	Los Patos	1.16367	0.970022	1.00117	1.1022	1.04317	1.07593	0.747999	0.991433	1.05094	0.974502	1.0121	1.05605	0.96816	-0.111373
1295	90	1	Los Patos	1.16367	0.970022	1.00117	1.1022	1.04317	1.07593	0.747999	0.991433	1.05094	0.974502	1.0121	1.05605	0.96816	-0.111373
1296	50	0	Los Patos	1.16367	0.970022	1.00117	1.1022	1.04317	1.07593	0.747999	0.991433	1.05094	0.974502	1.0121	1.05605	0.96816	-0.111373
1297	90	1	Los Patos	1.16367	0.970022	1.00117	1.1022	1.04317	1.07593	0.747999	0.991433	1.05094	0.974502	1.0121	1.05605	0.96816	-0.111373
1298	90	1	Los Patos	1.16367	0.970022	1.00117	1.1022	1.04317	1.07593	0.747999	0.991433	1.05094	0.974502	1.0121	1.05605	0.96816	-0.111373
1299	60	1	Los Patos	1.16367	0.970022	1.00117	1.1022	1.04317	1.07593	0.747999	0.991433	1.05094	0.974502	1.0121	1.05605	0.96816	-0.111373
1300	90	1	Los Patos	1.16367	0.970022	1.00117	1.1022	1.04317	1.07593	0.747999	0.991433	1.05094	0.974502	1.0121	1.05605	0.96816	-0.111373
1301	30	1	Los Patos	1.16367	0.970022	1.00117	1.1022	1.04317	1.07593	0.747999	0.991433	1.05094	0.974502	1.0121	1.05605	0.96816	-0.111373
1302	80	1	Los Patos	1.16367	0.970022	1.00117	1.1022	1.04317	1.07593	0.747999	0.991433	1.05094	0.974502	1.0121	1.05605	0.96816	-0.111373
1303	60	0	El Morrillo Sur	1.10482	0.993973	1.00418	1.13125	1.04576	1.05979	0.897599	1.05792	1.11499	1.01967	1.04299	1.056	1.02999	-0.593989
1304	25	0	El Morrillo Sur	1.10482	0.993973	1.00418	1.13125	1.04576	1.05979	0.897599	1.05792	1.11499	1.01967	1.04299	1.056	1.02999	-0.593989
1305	90	0	El Morrillo Sur	1.10482	0.993973	1.00418	1.13125	1.04576	1.05979	0.897599	1.05792	1.11499	1.01967	1.04299	1.056	1.02999	-0.593989
1306	12	0	El Morrillo Sur	1.10482	0.993973	1.00418	1.13125	1.04576	1.05979	0.897599	1.05792	1.11499	1.01967	1.04299	1.056	1.02999	-0.593989
1307	30	0	El Morrillo Sur	1.10482	0.993973	1.00418	1.13125	1.04576	1.05979	0.897599	1.05792	1.11499	1.01967	1.04299	1.056	1.02999	-0.593989
1308	20	0	El Morrillo Sur	1.10482	0.993973	1.00418	1.13125	1.04576	1.05979	0.897599	1.05792	1.11499	1.01967	1.04299	1.056	1.02999	-0.593989
1309	40	0	El Morrillo Sur	1.10482	0.993973	1.00418	1.13125	1.04576	1.05979	0.897599	1.05792	1.11499	1.01967	1.04299	1.056	1.02999	-0.593989
1310	10	0	El Morrillo Sur	1.10482	0.993973	1.00418	1.13125	1.04576	1.05979	0.897599	1.05792	1.11499	1.01967	1.04299	1.056	1.02999	-0.593989
1311	10	0	El Morrillo Sur	1.10482	0.993973	1.00418	1.13125	1.04576	1.05979	0.897599	1.05792	1.11499	1.01967	1.04299	1.056	1.02999	-0.593989
1312	10	0	El Morrillo Sur	1.10482	0.993973	1.00418	1.13125	1.04576	1.05979	0.897599	1.05792	1.11499	1.01967	1.04299	1.056	1.02999	-0.593989
1313	40	0	El Morrillo Sur	1.10482	0.993973	1.00418	1.13125	1.04576	1.05979	0.897599	1.05792	1.11499	1.01967	1.04299	1.056	1.02999	-0.593989
1314	15	0	El Morrillo Sur	1.10482	0.993973	1.00418	1.13125	1.04576	1.05979	0.897599	1.05792	1.11499	1.01967	1.04299	1.056	1.02999	-0.593989
1315	60	0	El Morrillo Sur	1.10482	0.993973	1.00418	1.13125	1.04576	1.05979	0.897599	1.05792	1.11499	1.01967	1.04299	1.056	1.02999	-0.593989
1316	80	0	El Morrillo Sur	1.10482	0.993973	1.00418	1.13125	1.04576	1.05979	0.897599	1.05792	1.11499	1.01967	1.04299	1.056	1.02999	-0.593989
1317	50	0	El Morrillo Sur	1.10482	0.993973	1.00418	1.13125	1.04576	1.05979	0.897599	1.05792	1.11499	1.01967	1.04299	1.056	1.02999	-0.593989
1318	70	0	El Morrillo Sur	1.10482	0.993973	1.00418	1.13125	1.04576	1.05979	0.897599	1.05792	1.11499	1.01967	1.04299	1.056	1.02999	-0.593989
1319	60	0	El Morrillo Sur	1.10482	0.993973	1.00418	1.13125	1.04576	1.05979	0.897599	1.05792	1.11499	1.01967	1.04299	1.056	1.02999	-0.593989
1320	40	0	El Morrillo Sur	1.10482	0.993973	1.00418	1.13125	1.04576	1.05979	0.897599	1.05792	1.11499	1.01967	1.04299	1.056	1.02999	-0.593989
1321	15	0	El Morrillo Sur	1.10482	0.993973	1.00418	1.13125	1.04576	1.05979	0.897599	1.05792	1.11499	1.01967	1.04299	1.056	1.02999	-0.593989
1322	50	0	El Morrillo Sur	1.10482	0.993973	1.00418	1.13125	1.04576	1.05979	0.897599	1.05792	1.11499	1.01967	1.04299	1.056	1.02999	-0.593989
1323	90	0	El Morrillo Sur	1.10482	0.993973	1.00418	1.13125	1.04576	1.05979	0.897599	1.05792	1.11499	1.01967	1.04299	1.056	1.02999	-0.593989
1324	40	1	El Morrillo Sur	1.10482	0.993973	1.00418	1.13125	1.04576	1.05979	0.897599	1.05792	1.11499	1.01967	1.04299	1.056	1.02999	-0.593989
1325	40	0	El Morrillo Sur	1.10482	0.993973	1.00418	1.13125	1.04576	1.05979	0.897599	1.05792	1.11499	1.01967	1.04299	1.056	1.02999	-0.593989
1326	100	0	El Morrillo Sur	1.10482	0.993973	1.00418	1.13125	1.04576	1.05979	0.897599	1.05792	1.11499	1.01967	1.04299	1.056	1.02999	-0.593989
1327	60	0	El Morrillo Sur	1.10482	0.993973	1.00418	1.13125	1.04576	1.05979	0.897599	1.05792	1.11499	1.01967	1.04299	1.056	1.02999	-0.593989
1328	70	0	El Morrillo Sur	1.10482	0.993973	1.00418	1.13125	1.04576	1.05979	0.897599	1.05792	1.11499	1.01967	1.04299	1.056	1.02999	-0.593989
1329	100	1	El Morrillo Sur	1.10482	0.993973	1.00418	1.13125	1.04576	1.05979	0.897599	1.05792	1.11499	1.01967	1.04299	1.056	1.02999	-0.593989
1330	15	0	El Morrillo Sur	1.10482	0.993973	1.00418	1.13125	1.04576	1.05979	0.897599	1.05792	1.11499	1.01967	1.04299	1.056	1.02999	-0.593989
1331	15	0	El Morrillo Sur	1.10482	0.993973	1.00418	1.13125	1.04576	1.05979	0.897599	1.05792	1.11499	1.01967	1.04299	1.056	1.02999	-0.593989
1332	15	0	El Morrillo Sur	1.10482	0.993973	1.00418	1.13125	1.04576	1.05979	0.897599	1.05792	1.11499	1.01967	1.04299	1.056	1.02999	-0.593989
1333	15	0	El Morrillo Sur	1.10482	0.993973	1.00418	1.13125	1.04576	1.05979	0.897599	1.05792	1.11499	1.01967	1.04299	1.056	1.02999	-0.593989
1334	90	0	El Morrillo Sur	1.10482	0.993973	1.00418	1.13125	1.04576	1.05979	0.897599	1.05792	1.11499	1.01967	1.04299	1.056	1.02999	-0.593989
1335	150	1	El Morrillo Sur	1.10482	0.993973	1.00418	1.13125	1.04576	1.05979	0.897599	1.05792	1.11499	1.01967	1.04299	1.056	1.02999	-0.593989
1336	100	1	El Morrillo Sur	1.10482	0.993973	1.00418	1.13125	1.04576	1.05979	0.897599	1.05792	1.11499	1.01967	1.04299	1.056	1.02999	-0.593989
1337	100	0	El Morrillo Sur	1.10482	0.993973	1.00418	1.13125	1.04576	1.05979	0.897599	1.05792	1.11499	1.01967	1.04299	1.056	1.02999	-0.593989
1338	15	0	El Morrillo Sur	1.10482	0.993973	1.00418	1.13125	1.04576	1.05979	0.897599	1.05792	1.11499	1.01967	1.04299	1.056	1.02999	-0.593989
1339	30	0	El Morrillo Sur	1.10482	0.993973	1.00418	1.13125	1.04576	1.05979	0.897599	1.05792	1.11499	1.01967	1.04299	1.056	1.02999	-0.593989
1340	100	1	El Morrillo Sur	1.10482	0.993973	1.00418	1.13125	1.04576	1.05979	0.897599	1.05792	1.11499	1.01967	1.04299	1.056	1.02999	-0.593989
1341	30	0	El Morrillo Sur	1.10482	0.993973	1.00418	1.13125	1.04576	1.05979	0.897599	1.05792	1.11499	1.01967	1.04299	1.056	1.02999	-0.593989
1342	80	0	El Morrillo Sur	1.10482	0.993973	1.00418	1.13125	1.04576	1.05979	0.897599	1.05792	1.11499	1.01967	1.04299	1.056	1.02999	-0.593989
1343	110	1	El Morrillo Sur	1.10482	0.993973	1.00418	1.13125	1.04576	1.05979	0.897599	1.05792	1.11499	1.01967	1.04299	1.056	1.02999	-0.593989
1344	150	1	El Morrillo Sur	1.10482	0.993973	1.00418	1.13125	1.04576	1.05979	0.897599	1.05792	1.11499	1.01967	1.04299	1.056	1.02999	-0.593989
1345	90	0	El Morrillo Sur	1.10482	0.993973	1.00418	1.13125	1.04576	1.05979	0.897599	1.05792	1.11499	1.01967	1.04299	1.056	1.02999	-0.593989
1346	60	0	El Morrillo Sur	1.10482	0.993973	1.00418	1.13125	1.04576	1.05979	0.897599	1.05792	1.11499	1.01967	1.04299	1.056	1.02999	-0.593989
1347	90	1	El Morrillo Sur	0.877433	0.981998	0.972612	1.11416	1.04576	1.04634	0.804319	0.977744	1.01298	0.920652	0.9754	0.998392	0.952408	-1.54994
1348	40	0	El Morrillo Sur	0.877433	0.981998	0.972612	1.11416	1.04576	1.04634	0.804319	0.977744	1.01298	0.920652	0.9754	0.998392	0.952408	-1.54994
1349	60	0	El Morrillo Sur	1.10482	0.993973	1.00418	1.13125	1.04576	1.05979	0.897599	1.05792	1.11499	1.01967	1.04299	1.056	1.02999	-0.593989
1350	25	0	El Morrillo Sur	1.10482	0.993973	1.00418	1.13125	1.04576	1.05979	0.897599	1.05792	1.11499	1.01967	1.04299	1.056	1.02999	-0.593989
1351	40	0	El Morrillo Sur	1.10482	0.993973	1.00418	1.13125	1.04576	1.05979	0.897599	1.05792	1.11499	1.01967	1.04299	1.056	1.02999	-0.593989
1352	40	0	El Morrillo Sur	1.10482	0.993973	1.00418	1.13125	1.04576	1.05979	0.897599	1.05792	1.11499	1.01967	1.04299	1.056	1.02999	-0.593989
1353	20	0	El Morrillo Sur	1.10482	0.993973	1.00418	1.13125	1.04576	1.05979	0.897599	1.05792	1.11499	1.01967	1.04299	1.056	1.02999	-0.593989
1354	30	0	El Morrillo Sur	1.10482	0.993973	1.00418	1.13125	1.04576	1.05979	0.897599	1.05792	1.11499	1.01967	1.04299	1.056	1.02999	-0.593989
1355	30	0	El Morrillo Sur	1.10482	0.993973	1.00418	1.13125	1.04576	1.05979	0.897599	1.05792	1.11499	1.01967	1.04299	1.056	1.02999	-0.593989
1356	60	0	El Morrillo Sur	1.10482	0.993973	1.00418	1.13125	1.04576	1.05979	0.897599	1.05792	1.11499	1.01967	1.04299	1.056	1.02999	-0.593989
1357	60	0	El Morrillo Sur	1.10482	0.993973	1.00418	1.13125	1.04576	1.05979	0.897599	1.05792	1.11499	1.01967	1.04299	1.056	1.02999	-0.593989
1358	40	0	El Morrillo Sur	1.10482	0.993973	1.00418	1.13125	1.04576	1.05979	0.897599	1.05792	1.11499	1.01967	1.04299	1.056	1.02999	-0.593989
1359	40	0	El Morrillo Sur	1.10482	0.993973	1.00418	1.13125	1.04576	1.05979	0.897599	1.05792	1.11499	1.01967	1.04299	1.056	1.02999	-0.593989
1360	40	0	El Morrillo Sur	1.10482	0.993973	1.00418	1.13125	1.04576	1.05979	0.897599	1.05792	1.11499	1.01967	1.04299	1.056	1.02999	-0.593989
1361	40	0	El Morrillo Sur	1.10482	0.993973	1.00418	1.13125	1.04576	1.05979	0.897599	1.05792	1.11499	1.01967	1.04299	1.056	1.02999	-0.593989
1362	40	0	El Morrillo Sur	1.10482	0.993973	1.00418	1.13125	1.04576	1.05979	0.897599	1.05792	1.11499	1.01967	1.04299	1.056	1.02999	-0.593989
1363	30	0	El Morrillo Sur	1.10482	0.993973	1.00418	1.13125	1.04576	1.05979	0.897599	1.05792	1.11499	1.01967	1.04299	1.056	1.02999	-0.593989
1364	20	0	El Morrillo Sur	1.10482	0.993973	1.00418	1.13125	1.04576	1.05979	0.897599	1.05792	1.11499	1.01967	1.04299	1.056	1.02999	-0.593989
1365	40	0	El Morrillo Sur	1.10482	0.993973	1.00418	1.13125	1.04576	1.05979	0.897599	1.05792	1.11499	1.01967	1.04299	1.056	1.02999	-0.593989
1366	40	0	El Morrillo Sur	1.10482	0.993973	1.00418	1.13125	1.04576	1.05979	0.897599	1.05792	1.11499	1.01967	1.04299	1.056	1.02999	-0.593989
1367	30	0	El Morrillo Sur	1.10482	0.993973	1.00418	1.13125	1.04576	1.05979	0.897599	1.05792	1.11499	1.01967	1.04299	1.056	1.02999	-0.593989
1368	60	0	El Morrillo Sur	1.10482	0.993973	1.00418	1.13125	1.04576	1.05979	0.897599	1.05792	1.11499	1.01967	1.04299	1.056	1.02999	-0.593989
1369	40	0	El Morrillo Sur	1.10482	0.993973	1.00418	1.13125	1.04576	1.05979	0.897599	1.05792	1.11499	1.01967	1.04299	1.056	1.02999	-0.593989
1370	40	0	El Morrillo Sur	1.10482	0.993973	1.00418	1.13125	1.04576	1.05979	0.897599	1.05792	1.11499	1.01967	1.04299	1.056	1.02999	-0.593989
1371	130	1	El Morrillo Sur	1.10482	0.993973	1.00418	1.13125	1.04576	1.05979	0.897599	1.05792	1.11499	1.01967	1.04299	1.056	1.02999	-0.593989
1372	145	0	El Morrillo Sur	1.10482	0.993973	1.00418	1.13125	1.04576	1.05979	0.897599	1.05792	1.11499	1.01967	1.04299	1.056	1.02999	-0.593989
1373	40	0	El Morrillo Sur	1.10482	0.993973	1.00418	1.13125	1.04576	1.05979	0.897599	1.05792	1.11499	1.01967	1.04299	1.056	1.02999	-0.593989
1374	10	0	El Morrillo Sur	1.10482	0.993973	1.00418	1.13125	1.04576	1.05979	0.897599	1.05792	1.11499	1.01967	1.04299	1.056	1.02999	-0.593989
1375	15	0	El Morrillo Sur	1.10482	0.993973	1.00418	1.13125	1.04576	1.05979	0.897599	1.05792	1.11499	1.01967	1.04299	1.056	1.02999	-0.593989
1376	15	0	El Morrillo Sur	1.10482	0.993973	1.00418	1.13125	1.04576	1.05979	0.897599	1.05792	1.11499	1.01967	1.04299	1.056	1.02999	-0.593989
1377	10	0	El Morrillo Sur	1.10482	0.993973	1.00418	1.13125	1.04576	1.05979	0.897599	1.05792	1.11499	1.01967	1.04299	1.056	1.02999	-0.593989
1378	120	1	El Morrillo Sur	1.10482	0.993973	1.00418	1.13125	1.04576	1.05979	0.897599	1.05792	1.11499	1.01967	1.04299	1.056	1.02999	-0.593989
1379	90	0	El Morrillo Sur	1.10482	0.993973	1.00418	1.13125	1.04576	1.05979	0.897599	1.05792	1.11499	1.01967	1.04299	1.056	1.02999	-0.593989
1380	55	0	El Morrillo Norte	1.10482	0.993973	1.00418	1.13125	1.04576	1.05979	0.897599	1.05792	1.11499	1.01967	1.04299	1.056	1.02999	-0.593989
1381	40	0	El Morrillo Norte	1.10482	0.993973	1.00418	1.13125	1.04576	1.05979	0.897599	1.05792	1.11499	1.01967	1.04299	1.056	1.02999	-0.593989
1382	20	0	El Morrillo Norte	1.10482	0.993973	1.00418	1.13125	1.04576	1.05979	0.897599	1.05792	1.11499	1.01967	1.04299	1.056	1.02999	-0.593989
1383	25	0	El Morrillo Norte	1.10482	0.993973	1.00418	1.13125	1.04576	1.05979	0.897599	1.05792	1.11499	1.01967	1.04299	1.056	1.02999	-0.593989
1384	50	0	Loma Larga Oeste	0.861383	1.01194	1.00568	1.00309	0.95775	0.906468	1.07184	1.04619	0.958421	0.932812	0.975556	0.967968	0.983145	-1.35504
1385	25	0	Loma Larga Oeste	0.861383	1.01194	1.00568	1.00309	0.95775	0.906468	1.07184	1.04619	0.958421	0.932812	0.975556	0.967968	0.983145	-1.35504
1386	30	0	Loma Larga Oeste	0.861383	1.01194	1.00568	1.00309	0.95775	0.906468	1.07184	1.04619	0.958421	0.932812	0.975556	0.967968	0.983145	-1.35504
1387	65	1	Loma Larga Oeste	0.861383	1.01194	1.00568	1.00309	0.95775	0.906468	1.07184	1.04619	0.958421	0.932812	0.975556	0.967968	0.983145	-1.35504
1388	45	0	Loma Larga Oeste	0.861383	1.01194	1.00568	1.00309	0.95775	0.906468	1.07184	1.04619	0.958421	0.932812	0.975556	0.967968	0.983145	-1.35504
1389	40	0	Loma Larga Oeste	0.861383	1.01194	1.00568	1.00309	0.95775	0.906468	1.07184	1.04619	0.958421	0.932812	0.975556	0.967968	0.983145	-1.35504
1390	40	0	Loma Larga Oeste	0.861383	1.01194	1.00568	1.00309	0.95775	0.906468	1.07184	1.04619	0.958421	0.932812	0.975556	0.967968	0.983145	-1.35504
1391	50	1	Loma Larga Oeste	0.861383	1.01194	1.00568	1.00309	0.95775	0.906468	1.07184	1.04619	0.958421	0.932812	0.975556	0.967968	0.983145	-1.35504
1392	35	0	Loma Larga Oeste	0.861383	1.01194	1.00568	1.00309	0.95775	0.906468	1.07184	1.04619	0.958421	0.932812	0.975556	0.967968	0.983145	-1.35504
1393	20	0	Loma Larga Oeste	0.861383	1.01194	1.00568	1.00309	0.95775	0.906468	1.07184	1.04619	0.958421	0.932812	0.975556	0.967968	0.983145	-1.35504
1394	40	0	Loma Larga Oeste	0.861383	1.01194	1.00568	1.00309	0.95775	0.906468	1.07184	1.04619	0.958421	0.932812	0.975556	0.967968	0.983145	-1.35504
1395	80	1	Loma Larga Oeste	0.861383	1.01194	1.00568	1.00309	0.95775	0.906468	1.07184	1.04619	0.958421	0.932812	0.975556	0.967968	0.983145	-1.35504
1396	30	0	Loma Larga Oeste	0.861383	1.01194	1.00568	1.00309	0.95775	0.906468	1.07184	1.04619	0.958421	0.932812	0.975556	0.967968	0.983145	-1.35504
1397	50	0	Loma Larga Oeste	0.861383	1.01194	1.00568	1.00309	0.95775	0.906468	1.07184	1.04619	0.958421	0.932812	0.975556	0.967968	0.983145	-1.35504
1398	20	0	Loma Larga Oeste	0.861383	1.01194	1.00568	1.00309	0.95775	0.906468	1.07184	1.04619	0.958421	0.932812	0.975556	0.967968	0.983145	-1.35504
1399	30	0	Loma Larga Oeste	0.861383	1.01194	1.00568	1.00309	0.95775	0.906468	1.07184	1.04619	0.958421	0.932812	0.975556	0.967968	0.983145	-1.35504
1400	60	0	Loma Larga Oeste	0.861383	1.01194	1.00568	1.00309	0.95775	0.906468	1.07184	1.04619	0.958421	0.932812	0.975556	0.967968	0.983145	-1.35504
1401	65	1	Loma Larga Oeste	0.861383	1.01194	1.00568	1.00309	0.95775	0.906468	1.07184	1.04619	0.958421	0.932812	0.975556	0.967968	0.983145	-1.35504
1402	35	0	Loma Larga Oeste	0.861383	1.01194	1.00568	1.00309	0.95775	0.906468	1.07184	1.04619	0.958421	0.932812	0.975556	0.967968	0.983145	-1.35504
1403	85	1	Loma Larga Oeste	0.861383	1.01194	1.00568	1.00309	0.95775	0.906468	1.07184	1.04619	0.958421	0.932812	0.975556	0.967968	0.983145	-1.35504
1404	90	1	Loma Larga Oeste	0.861383	1.01194	1.00568	1.00309	0.95775	0.906468	1.07184	1.04619	0.958421	0.932812	0.975556	0.967968	0.983145	-1.35504
1405	90	1	Loma Larga Oeste	0.861383	1.01194	1.00568	1.00309	0.95775	0.906468	1.07184	1.04619	0.958421	0.932812	0.975556	0.967968	0.983145	-1.35504
1406	60	0	Loma Larga Oeste	0.861383	1.01194	1.00568	1.00309	0.95775	0.906468	1.07184	1.04619	0.958421	0.932812	0.975556	0.967968	0.983145	-1.35504
1407	140	1	Loma Larga Oeste	0.861383	1.01194	1.00568	1.00309	0.95775	0.906468	1.07184	1.04619	0.958421	0.932812	0.975556	0.967968	0.983145	-1.35504
1408	80	1	Loma Larga Oeste	0.861383	1.01194	1.00568	1.00309	0.95775	0.906468	1.07184	1.04619	0.958421	0.932812	0.975556	0.967968	0.983145	-1.35504
1409	60	0	Loma Larga Oeste	0.861383	1.01194	1.00568	1.00309	0.95775	0.906468	1.07184	1.04619	0.958421	0.932812	0.975556	0.967968	0.983145	-1.35504
1410	20	0	Loma Larga Oeste	0.861383	1.01194	1.00568	1.00309	0.95775	0.906468	1.07184	1.04619	0.958421	0.932812	0.975556	0.967968	0.983145	-1.35504
1411	30	0	Loma Larga Oeste	0.861383	1.01194	1.00568	1.00309	0.95775	0.906468	1.07184	1.04619	0.958421	0.932812	0.975556	0.967968	0.983145	-1.35504
1412	30	0	Loma Larga Oeste	0.861383	1.01194	1.00568	1.00309	0.95775	0.906468	1.07184	1.04619	0.958421	0.932812	0.975556	0.967968	0.983145	-1.35504
1413	80	0	Loma Larga Oeste	0.861383	1.01194	1.00568	1.00309	0.95775	0.906468	1.07184	1.04619	0.958421	0.932812	0.975556	0.967968	0.983145	-1.35504
1414	110	1	Loma Larga Oeste	0.861383	1.01194	1.00568	1.00309	0.95775	0.906468	1.07184	1.04619	0.958421	0.932812	0.975556	0.967968	0.983145	-1.35504
1415	60	0	Loma Larga Oeste	0.861383	1.01194	1.00568	1.00309	0.95775	0.906468	1.07184	1.04619	0.958421	0.932812	0.975556	0.967968	0.983145	-1.35504
1416	70	0	Loma Larga Oeste	0.861383	1.01194	1.00568	1.00309	0.95775	0.906468	1.07184	1.04619	0.958421	0.932812	0.975556	0.967968	0.983145	-1.35504
1417	70	0	Loma Larga Oeste	0.861383	1.01194	1.00568	1.00309	0.95775	0.906468	1.07184	1.04619	0.958421	0.932812	0.975556	0.967968	0.983145	-1.35504
1418	45	0	Loma Larga Oeste	0.861383	1.01194	1.00568	1.00309	0.95775	0.906468	1.07184	1.04619	0.958421	0.932812	0.975556	0.967968	0.983145	-1.35504
1419	60	1	Loma Larga Oeste	0.861383	1.01194	1.00568	1.00309	0.95775	0.906468	1.07184	1.04619	0.958421	0.932812	0.975556	0.967968	0.983145	-1.35504
1420	65	1	Loma Larga Oeste	0.861383	1.01194	1.00568	1.00309	0.95775	0.906468	1.07184	1.04619	0.958421	0.932812	0.975556	0.967968	0.983145	-1.35504
1421	85	1	Loma Larga Oeste	0.861383	1.01194	1.00568	1.00309	0.95775	0.906468	1.07184	1.04619	0.958421	0.932812	0.975556	0.967968	0.983145	-1.35504
1422	80	1	Loma Larga Oeste	0.861383	1.01194	1.00568	1.00309	0.95775	0.906468	1.07184	1.04619	0.958421	0.932812	0.975556	0.967968	0.983145	-1.35504
1423	45	0	Loma Larga Oeste	0.861383	1.01194	1.00568	1.00309	0.95775	0.906468	1.07184	1.04619	0.958421	0.932812	0.975556	0.967968	0.983145	-1.35504
1424	85	1	Loma Larga Oeste	0.861383	1.01194	1.00568	1.00309	0.95775	0.906468	1.07184	1.04619	0.958421	0.932812	0.975556	0.967968	0.983145	-1.35504
1425	45	1	Loma Larga Oeste	0.861383	1.01194	1.00568	1.00309	0.95775	0.906468	1.07184	1.04619	0.958421	0.932812	0.975556	0.967968	0.983145	-1.35504
1426	40	1	Loma Larga Oeste	0.861383	1.01194	1.00568	1.00309	0.95775	0.906468	1.07184	1.04619	0.958421	0.932812	0.975556	0.967968	0.983145	-1.35504
1427	40	0	Loma Larga Oeste	0.861383	1.01194	1.00568	1.00309	0.95775	0.906468	1.07184	1.04619	0.958421	0.932812	0.975556	0.967968	0.983145	-1.35504
1428	40	0	Loma Larga Oeste	0.861383	1.01194	1.00568	1.00309	0.95775	0.906468	1.07184	1.04619	0.958421	0.932812	0.975556	0.967968	0.983145	-1.35504
1429	40	0	Loma Larga Oeste	0.861383	1.01194	1.00568	1.00309	0.95775	0.906468	1.07184	1.04619	0.958421	0.932812	0.975556	0.967968	0.983145	-1.35504
1430	40	0	Loma Larga Oeste	0.861383	1.01194	1.00568	1.00309	0.95775	0.906468	1.07184	1.04619	0.958421	0.932812	0.975556	0.967968	0.983145	-1.35504
1431	65	0	Loma Larga Oeste	0.861383	1.01194	1.00568	1.00309	0.95775	0.906468	1.07184	1.04619	0.958421	0.932812	0.975556	0.967968	0.983145	-1.35504
1432	45	0	Loma Larga Oeste	0.861383	1.01194	1.00568	1.00309	0.95775	0.906468	1.07184	1.04619	0.958421	0.932812	0.975556	0.967968	0.983145	-1.35504
1433	35	0	Loma Larga Oeste	0.861383	1.01194	1.00568	1.00309	0.95775	0.906468	1.07184	1.04619	0.958421	0.932812	0.975556	0.967968	0.983145	-1.35504
1434	15	0	Loma Larga Oeste	0.861383	1.01194	1.00568	1.00309	0.95775	0.906468	1.07184	1.04619	0.958421	0.932812	0.975556	0.967968	0.983145	-1.35504
1435	55	0	Loma Larga Oeste	0.861383	1.01194	1.00568	1.00309	0.95775	0.906468	1.07184	1.04619	0.958421	0.932812	0.975556	0.967968	0.983145	-1.35504
1436	45	1	Loma Larga Oeste	0.861383	1.01194	1.00568	1.00309	0.95775	0.906468	1.07184	1.04619	0.958421	0.932812	0.975556	0.967968	0.983145	-1.35504
1437	40	0	Loma Larga Oeste	0.861383	1.01194	1.00568	1.00309	0.95775	0.906468	1.07184	1.04619	0.958421	0.932812	0.975556	0.967968	0.983145	-1.35504
1438	55	0	Loma Larga Oeste	0.861383	1.01194	1.00568	1.00309	0.95775	0.906468	1.07184	1.04619	0.958421	0.932812	0.975556	0.967968	0.983145	-1.35504
1439	70	0	Loma Larga Oeste	0.861383	1.01194	1.00568	1.00309	0.95775	0.906468	1.07184	1.04619	0.958421	0.932812	0.975556	0.967968	0.983145	-1.35504
1440	100	0	Loma Larga Oeste	0.861383	1.01194	1.00568	1.00309	0.95775	0.906468	1.07184	1.04619	0.958421	0.932812	0.975556	0.967968	0.983145	-1.35504
1441	50	0	Loma Larga Oeste	0.861383	1.01194	1.00568	1.00309	0.95775	0.906468	1.07184	1.04619	0.958421	0.932812	0.975556	0.967968	0.983145	-1.35504
1442	55	0	Loma Larga Oeste	0.861383	1.01194	1.00568	1.00309	0.95775	0.906468	1.07184	1.04619	0.958421	0.932812	0.975556	0.967968	0.983145	-1.35504
1443	60	0	Loma Larga Oeste	0.861383	1.01194	1.00568	1.00309	0.95775	0.906468	1.07184	1.04619	0.958421	0.932812	0.975556	0.967968	0.983145	-1.35504
1444	80	0	Loma Larga Oeste	0.861383	1.01194	1.00568	1.00309	0.95775	0.906468	1.07184	1.04619	0.958421	0.932812	0.975556	0.967968	0.983145	-1.35504
1445	80	1	Loma Larga Oeste	0.861383	1.01194	1.00568	1.00309	0.95775	0.906468	1.07184	1.04619	0.958421	0.932812	0.975556	0.967968	0.983145	-1.35504
1446	55	1	Loma Larga Oeste	0.861383	1.01194	1.00568	1.00309	0.95775	0.906468	1.07184	1.04619	0.958421	0.932812	0.975556	0.967968	0.983145	-1.35504
1447	60	0	Loma Larga Oeste	0.861383	1.01194	1.00568	1.00309	0.95775	0.906468	1.07184	1.04619	0.958421	0.932812	0.975556	0.967968	0.983145	-1.35504
1448	50	0	Loma Larga Oeste	0.861383	1.01194	1.00568	1.00309	0.95775	0.906468	1.07184	1.04619	0.958421	0.932812	0.975556	0.967968	0.983145	-1.35504
1449	50	0	Loma Larga Oeste	0.861383	1.01194	1.00568	1.00309	0.95775	0.906468	1.07184	1.04619	0.958421	0.932812	0.975556	0.967968	0.983145	-1.35504
1450	60	0	Loma Larga Oeste	0.861383	1.01194	1.00568	1.00309	0.95775	0.906468	1.07184	1.04619	0.958421	0.932812	0.975556	0.967968	0.983145	-1.35504
1451	90	1	Loma Larga Oeste	0.861383	1.01194	1.00568	1.00309	0.95775	0.906468	1.07184	1.04619	0.958421	0.932812	0.975556	0.967968	0.983145	-1.35504
1452	80	0	Loma Larga Oeste	0.861383	1.01194	1.00568	1.00309	0.95775	0.906468	1.07184	1.04619	0.958421	0.932812	0.975556	0.967968	0.983145	-1.35504
1453	110	1	Loma Larga Oeste	0.861383	1.01194	1.00568	1.00309	0.95775	0.906468	1.07184	1.04619	0.958421	0.932812	0.975556	0.967968	0.983145	-1.35504
1454	90	0	Loma Larga Oeste	0.861383	1.01194	1.00568	1.00309	0.95775	0.906468	1.07184	1.04619	0.958421	0.932812	0.975556	0.967968	0.983145	-1.35504
1455	70	0	Loma Larga Oeste	0.861383	1.01194	1.00568	1.00309	0.95775	0.906468	1.07184	1.04619	0.958421	0.932812	0.975556	0.967968	0.983145	-1.35504
1456	100	0	Loma Larga Oeste	0.861383	1.01194	1.00568	1.00309	0.95775	0.906468	1.07184	1.04619	0.958421	0.932812	0.975556	0.967968	0.983145	-1.35504
1457	35	0	Loma Larga Oeste	0.861383	1.01194	1.00568	1.00309	0.95775	0.906468	1.07184	1.04619	0.958421	0.932812	0.975556	0.967968	0.983145	-1.35504
1458	70	1	Loma Larga Oeste	0.861383	1.01194	1.00568	1.00309	0.95775	0.906468	1.07184	1.04619	0.958421	0.932812	0.975556	0.967968	0.983145	-1.35504
1459	25	0	Loma Larga Oeste	0.861383	1.01194	1.00568	1.00309	0.95775	0.906468	1.07184	1.04619	0.958421	0.932812	0.975556	0.967968	0.983145	-1.35504
1460	80	0	Loma Larga Oeste	0.861383	1.01194	1.00568	1.00309	0.95775	0.906468	1.07184	1.04619	0.958421	0.932812	0.975556	0.967968	0.983145	-1.35504
1461	110	0	Loma Larga Oeste	0.861383	1.01194	1.00568	1.00309	0.95775	0.906468	1.07184	1.04619	0.958421	0.932812	0.975556	0.967968	0.983145	-1.35504
1462	110	0	Loma Larga Oeste	0.861383	1.01194	1.00568	1.00309	0.95775	0.906468	1.07184	1.04619	0.958421	0.932812	0.975556	0.967968	0.983145	-1.35504
1463	35	0	Loma Larga Oeste	0.861383	1.01194	1.00568	1.00309	0.95775	0.906468	1.07184	1.04619	0.958421	0.932812	0.975556	0.967968	0.983145	-1.35504
1464	140	0	Loma Larga Oeste	0.861383	1.01194	1.00568	1.00309	0.95775	0.906468	1.07184	1.04619	0.958421	0.932812	0.975556	0.967968	0.983145	-1.35504
1465	85	1	Loma Larga Oeste	0.861383	1.01194	1.00568	1.00309	0.95775	0.906468	1.07184	1.04619	0.958421	0.932812	0.975556	0.967968	0.983145	-1.35504
1466	35	0	Loma Larga Oeste	0.861383	1.01194	1.00568	1.00309	0.95775	0.906468	1.07184	1.04619	0.958421	0.932812	0.975556	0.967968	0.983145	-1.35504
1467	70	0	Loma Larga Oeste	0.861383	1.01194	1.00568	1.00309	0.95775	0.906468	1.07184	1.04619	0.958421	0.932812	0.975556	0.967968	0.983145	-1.35504
1468	45	0	Loma Larga Oeste	0.861383	1.01194	1.00568	1.00309	0.95775	0.906468	1.07184	1.04619	0.958421	0.932812	0.975556	0.967968	0.983145	-1.35504
1469	45	0	Loma Larga Oeste	0.861383	1.01194	1.00568	1.00309	0.95775	0.906468	1.07184	1.04619	0.958421	0.932812	0.975556	0.967968	0.983145	-1.35504
1470	50	1	Loma Larga Oeste	0.861383	1.01194	1.00568	1.00309	0.95775	0.906468	1.07184	1.04619	0.958421	0.932812	0.975556	0.967968	0.983145	-1.35504
1471	65	1	Loma Larga Oeste	0.861383	1.01194	1.00568	1.00309	0.95775	0.906468	1.07184	1.04619	0.958421	0.932812	0.975556	0.967968	0.983145	-1.35504
1472	25	0	Loma Larga Oeste	0.861383	1.01194	1.00568	1.00309	0.95775	0.906468	1.07184	1.04619	0.958421	0.932812	0.975556	0.967968	0.983145	-1.35504
1473	110	0	Loma Larga Este	1.01119	0.984991	1.01019	0.953529	0.807616	0.922607	1.05072	0.813483	0.861155	1.05093	0.946642	0.953504	0.939779	-0.0556864
1474	20	0	Loma Larga Este	1.01119	0.984991	1.01019	0.953529	0.807616	0.922607	1.05072	0.813483	0.861155	1.05093	0.946642	0.953504	0.939779	-0.0556864
1475	70	0	Loma Larga Este	1.01119	0.984991	1.01019	0.953529	0.807616	0.922607	1.05072	0.813483	0.861155	1.05093	0.946642	0.953504	0.939779	-0.0556864
1476	85	0	Loma Larga Este	1.01119	0.984991	1.01019	0.953529	0.807616	0.922607	1.05072	0.813483	0.861155	1.05093	0.946642	0.953504	0.939779	-0.0556864
1477	30	0	Loma Larga Este	1.01119	0.984991	1.01019	0.953529	0.807616	0.922607	1.05072	0.813483	0.861155	1.05093	0.946642	0.953504	0.939779	-0.0556864
1478	120	0	Loma Larga Este	1.01119	0.984991	1.01019	0.953529	0.807616	0.922607	1.05072	0.813483	0.861155	1.05093	0.946642	0.953504	0.939779	-0.0556864
1479	85	1	Loma Larga Este	1.01119	0.984991	1.01019	0.953529	0.807616	0.922607	1.05072	0.813483	0.861155	1.05093	0.946642	0.953504	0.939779	-0.0556864
1480	100	0	Loma Larga Este	1.01119	0.984991	1.01019	0.953529	0.807616	0.922607	1.05072	0.813483	0.861155	1.05093	0.946642	0.953504	0.939779	-0.0556864
1481	100	0	Loma Larga Este	1.01119	0.984991	1.01019	0.953529	0.807616	0.922607	1.05072	0.813483	0.861155	1.05093	0.946642	0.953504	0.939779	-0.0556864
1482	90	1	Loma Larga Este	1.01119	0.984991	1.01019	0.953529	0.807616	0.922607	1.05072	0.813483	0.861155	1.05093	0.946642	0.953504	0.939779	-0.0556864
1483	60	0	Loma Larga Este	1.01119	0.984991	1.01019	0.953529	0.807616	0.922607	1.05072	0.813483	0.861155	1.05093	0.946642	0.953504	0.939779	-0.0556864
1484	60	0	Loma Larga Este	1.01119	0.984991	1.01019	0.953529	0.807616	0.922607	1.05072	0.813483	0.861155	1.05093	0.946642	0.953504	0.939779	-0.0556864
1485	70	0	Loma Larga Este	1.01119	0.984991	1.01019	0.953529	0.807616	0.922607	1.05072	0.813483	0.861155	1.05093	0.946642	0.953504	0.939779	-0.0556864
1486	80	0	Loma Larga Este	1.01119	0.984991	1.01019	0.953529	0.807616	0.922607	1.05072	0.813483	0.861155	1.05093	0.946642	0.953504	0.939779	-0.0556864
1487	75	0	Loma Larga Este	1.01119	0.984991	1.01019	0.953529	0.807616	0.922607	1.05072	0.813483	0.861155	1.05093	0.946642	0.953504	0.939779	-0.0556864
1488	70	1	Loma Larga Este	1.01119	0.984991	1.01019	0.953529	0.807616	0.922607	1.05072	0.813483	0.861155	1.05093	0.946642	0.953504	0.939779	-0.0556864
1489	65	0	Loma Larga Este	1.01119	0.984991	1.01019	0.953529	0.807616	0.922607	1.05072	0.813483	0.861155	1.05093	0.946642	0.953504	0.939779	-0.0556864
1490	80	0	Loma Larga Este	1.01119	0.984991	1.01019	0.953529	0.807616	0.922607	1.05072	0.813483	0.861155	1.05093	0.946642	0.953504	0.939779	-0.0556864
1491	110	1	Loma Larga Este	1.01119	0.984991	1.01019	0.953529	0.807616	0.922607	1.05072	0.813483	0.861155	1.05093	0.946642	0.953504	0.939779	-0.0556864
1492	55	0	Loma Larga Este	1.01119	0.984991	1.01019	0.953529	0.807616	0.922607	1.05072	0.813483	0.861155	1.05093	0.946642	0.953504	0.939779	-0.0556864
1493	60	0	Loma Larga Este	1.01119	0.984991	1.01019	0.953529	0.807616	0.922607	1.05072	0.813483	0.861155	1.05093	0.946642	0.953504	0.939779	-0.0556864
1494	80	0	Loma Larga Este	1.01119	0.984991	1.01019	0.953529	0.807616	0.922607	1.05072	0.813483	0.861155	1.05093	0.946642	0.953504	0.939779	-0.0556864
1495	110	1	Loma Larga Este	1.01119	0.984991	1.01019	0.953529	0.807616	0.922607	1.05072	0.813483	0.861155	1.05093	0.946642	0.953504	0.939779	-0.0556864
1496	60	0	Loma Larga Este	1.01119	0.984991	1.01019	0.953529	0.807616	0.922607	1.05072	0.813483	0.861155	1.05093	0.946642	0.953504	0.939779	-0.0556864
1497	70	0	Loma Larga Este	1.01119	0.984991	1.01019	0.953529	0.807616	0.922607	1.05072	0.813483	0.861155	1.05093	0.946642	0.953504	0.939779	-0.0556864
1498	55	1	Loma Larga Este	1.01119	0.984991	1.01019	0.953529	0.807616	0.922607	1.05072	0.813483	0.861155	1.05093	0.946642	0.953504	0.939779	-0.0556864
1499	55	0	Loma Larga Este	1.01119	0.984991	1.01019	0.953529	0.807616	0.922607	1.05072	0.813483	0.861155	1.05093	0.946642	0.953504	0.939779	-0.0556864
1500	50	0	Loma Larga Este	1.01119	0.984991	1.01019	0.953529	0.807616	0.922607	1.05072	0.813483	0.861155	1.05093	0.946642	0.953504	0.939779	-0.0556864
1501	35	0	Loma Larga Este	1.01119	0.984991	1.01019	0.953529	0.807616	0.922607	1.05072	0.813483	0.861155	1.05093	0.946642	0.953504	0.939779	-0.0556864
1502	50	0	Loma Larga Este	1.01119	0.984991	1.01019	0.953529	0.807616	0.922607	1.05072	0.813483	0.861155	1.05093	0.946642	0.953504	0.939779	-0.0556864
1503	35	0	Loma Larga Este	1.01119	0.984991	1.01019	0.953529	0.807616	0.922607	1.05072	0.813483	0.861155	1.05093	0.946642	0.953504	0.939779	-0.0556864
1504	40	0	Loma Larga Este	1.01119	0.984991	1.01019	0.953529	0.807616	0.922607	1.05072	0.813483	0.861155	1.05093	0.946642	0.953504	0.939779	-0.0556864
1505	120	0	Loma Larga Este	1.01119	0.984991	1.01019	0.953529	0.807616	0.922607	1.05072	0.813483	0.861155	1.05093	0.946642	0.953504	0.939779	-0.0556864
1506	70	0	Loma Larga Este	1.01119	0.984991	1.01019	0.953529	0.807616	0.922607	1.05072	0.813483	0.861155	1.05093	0.946642	0.953504	0.939779	-0.0556864
1507	40	0	Loma Larga Este	1.01119	0.984991	1.01019	0.953529	0.807616	0.922607	1.05072	0.813483	0.861155	1.05093	0.946642	0.953504	0.939779	-0.0556864
1508	100	0	Loma Larga Este	1.01119	0.984991	1.01019	0.953529	0.807616	0.922607	1.05072	0.813483	0.861155	1.05093	0.946642	0.953504	0.939779	-0.0556864
1509	20	0	Loma Larga Este	1.01119	0.984991	1.01019	0.953529	0.807616	0.922607	1.05072	0.813483	0.861155	1.05093	0.946642	0.953504	0.939779	-0.0556864
1510	80	0	Loma Larga Este	1.01119	0.984991	1.01019	0.953529	0.807616	0.922607	1.05072	0.813483	0.861155	1.05093	0.946642	0.953504	0.939779	-0.0556864
1511	90	0	Loma Larga Este	1.01119	0.984991	1.01019	0.953529	0.807616	0.922607	1.05072	0.813483	0.861155	1.05093	0.946642	0.953504	0.939779	-0.0556864
1512	80	0	Loma Larga Este	1.01119	0.984991	1.01019	0.953529	0.807616	0.922607	1.05072	0.813483	0.861155	1.05093	0.946642	0.953504	0.939779	-0.0556864
1513	70	0	Loma Larga Este	1.01119	0.984991	1.01019	0.953529	0.807616	0.922607	1.05072	0.813483	0.861155	1.05093	0.946642	0.953504	0.939779	-0.0556864
1514	65	0	Loma Larga Este	1.01119	0.984991	1.01019	0.953529	0.807616	0.922607	1.05072	0.813483	0.861155	1.05093	0.946642	0.953504	0.939779	-0.0556864
1515	80	0	Loma Larga Este	1.01119	0.984991	1.01019	0.953529	0.807616	0.922607	1.05072	0.813483	0.861155	1.05093	0.946642	0.953504	0.939779	-0.0556864
1516	85	0	Loma Larga Este	1.01119	0.984991	1.01019	0.953529	0.807616	0.922607	1.05072	0.813483	0.861155	1.05093	0.946642	0.953504	0.939779	-0.0556864
1517	60	0	Loma Larga Este	1.01119	0.984991	1.01019	0.953529	0.807616	0.922607	1.05072	0.813483	0.861155	1.05093	0.946642	0.953504	0.939779	-0.0556864
1518	100	0	Loma Larga Este	1.01119	0.984991	1.01019	0.953529	0.807616	0.922607	1.05072	0.813483	0.861155	1.05093	0.946642	0.953504	0.939779	-0.0556864
1519	60	0	Loma Larga Este	1.01119	0.984991	1.01019	0.953529	0.807616	0.922607	1.05072	0.813483	0.861155	1.05093	0.946642	0.953504	0.939779	-0.0556864
1520	90	1	Loma Larga Este	1.01119	0.984991	1.01019	0.953529	0.807616	0.922607	1.05072	0.813483	0.861155	1.05093	0.946642	0.953504	0.939779	-0.0556864
1521	60	0	Loma Larga Este	1.01119	0.984991	1.01019	0.953529	0.807616	0.922607	1.05072	0.813483	0.861155	1.05093	0.946642	0.953504	0.939779	-0.0556864
1522	90	0	Loma Larga Este	1.01119	0.984991	1.01019	0.953529	0.807616	0.922607	1.05072	0.813483	0.861155	1.05093	0.946642	0.953504	0.939779	-0.0556864
1523	60	0	Loma Larga Este	1.01119	0.984991	1.01019	0.953529	0.807616	0.922607	1.05072	0.813483	0.861155	1.05093	0.946642	0.953504	0.939779	-0.0556864
1524	90	0	Loma Larga Este	1.01119	0.984991	1.01019	0.953529	0.807616	0.922607	1.05072	0.813483	0.861155	1.05093	0.946642	0.953504	0.939779	-0.0556864
1525	100	1	Loma Larga Este	1.01119	0.984991	1.01019	0.953529	0.807616	0.922607	1.05072	0.813483	0.861155	1.05093	0.946642	0.953504	0.939779	-0.0556864
1526	60	0	Loma Larga Este	1.01119	0.984991	1.01019	0.953529	0.807616	0.922607	1.05072	0.813483	0.861155	1.05093	0.946642	0.953504	0.939779	-0.0556864
1527	70	0	Loma Larga Este	1.01119	0.984991	1.01019	0.953529	0.807616	0.922607	1.05072	0.813483	0.861155	1.05093	0.946642	0.953504	0.939779	-0.0556864
1528	80	0	Loma Larga Este	1.01119	0.984991	1.01019	0.953529	0.807616	0.922607	1.05072	0.813483	0.861155	1.05093	0.946642	0.953504	0.939779	-0.0556864
1529	90	0	Loma Larga Este	1.01119	0.984991	1.01019	0.953529	0.807616	0.922607	1.05072	0.813483	0.861155	1.05093	0.946642	0.953504	0.939779	-0.0556864
1530	90	0	Loma Larga Este	1.01119	0.984991	1.01019	0.953529	0.807616	0.922607	1.05072	0.813483	0.861155	1.05093	0.946642	0.953504	0.939779	-0.0556864
1531	45	0	Loma Larga Este	1.01119	0.984991	1.01019	0.953529	0.807616	0.922607	1.05072	0.813483	0.861155	1.05093	0.946642	0.953504	0.939779	-0.0556864
1532	130	1	Loma Larga Este	1.01119	0.984991	1.01019	0.953529	0.807616	0.922607	1.05072	0.813483	0.861155	1.05093	0.946642	0.953504	0.939779	-0.0556864
1533	60	0	Loma Larga Este	1.01119	0.984991	1.01019	0.953529	0.807616	0.922607	1.05072	0.813483	0.861155	1.05093	0.946642	0.953504	0.939779	-0.0556864
1534	120	0	Loma Larga Este	1.01119	0.984991	1.01019	0.953529	0.807616	0.922607	1.05072	0.813483	0.861155	1.05093	0.946642	0.953504	0.939779	-0.0556864
1535	40	0	Loma Larga Este	1.01119	0.984991	1.01019	0.953529	0.807616	0.922607	1.05072	0.813483	0.861155	1.05093	0.946642	0.953504	0.939779	-0.0556864
1536	10	0	Loma Larga Este	1.01119	0.984991	1.01019	0.953529	0.807616	0.922607	1.05072	0.813483	0.861155	1.05093	0.946642	0.953504	0.939779	-0.0556864
1537	115	0	Loma Larga Este	1.01119	0.984991	1.01019	0.953529	0.807616	0.922607	1.05072	0.813483	0.861155	1.05093	0.946642	0.953504	0.939779	-0.0556864
1538	90	0	Loma Larga Este	1.01119	0.984991	1.01019	0.953529	0.807616	0.922607	1.05072	0.813483	0.861155	1.05093	0.946642	0.953504	0.939779	-0.0556864
1539	20	0	Loma Larga Este	1.01119	0.984991	1.01019	0.953529	0.807616	0.922607	1.05072	0.813483	0.861155	1.05093	0.946642	0.953504	0.939779	-0.0556864
1540	35	0	Loma Larga Este	1.01119	0.984991	1.01019	0.953529	0.807616	0.922607	1.05072	0.813483	0.861155	1.05093	0.946642	0.953504	0.939779	-0.0556864
1541	30	0	Loma Larga Este	1.01119	0.984991	1.01019	0.953529	0.807616	0.922607	1.05072	0.813483	0.861155	1.05093	0.946642	0.953504	0.939779	-0.0556864
1542	90	0	Loma Larga Este	1.01119	0.984991	1.01019	0.953529	0.807616	0.922607	1.05072	0.813483	0.861155	1.05093	0.946642	0.953504	0.939779	-0.0556864
1543	60	0	Loma Larga Este	1.01119	0.984991	1.01019	0.953529	0.807616	0.922607	1.05072	0.813483	0.861155	1.05093	0.946642	0.953504	0.939779	-0.0556864
1544	105	0	Loma Larga Este	1.01119	0.984991	1.01019	0.953529	0.807616	0.922607	1.05072	0.813483	0.861155	1.05093	0.946642	0.953504	0.939779	-0.0556864
1545	110	1	Loma Larga Este	1.01119	0.984991	1.01019	0.953529	0.807616	0.922607	1.05072	0.813483	0.861155	1.05093	0.946642	0.953504	0.939779	-0.0556864
1546	80	0	Loma Larga Este	1.01119	0.984991	1.01019	0.953529	0.807616	0.922607	1.05072	0.813483	0.861155	1.05093	0.946642	0.953504	0.939779	-0.0556864
1547	90	0	Loma Larga Este	1.01119	0.984991	1.01019	0.953529	0.807616	0.922607	1.05072	0.813483	0.861155	1.05093	0.946642	0.953504	0.939779	-0.0556864
1548	140	0	Loma Larga Este	1.01119	0.984991	1.01019	0.953529	0.807616	0.922607	1.05072	0.813483	0.861155	1.05093	0.946642	0.953504	0.939779	-0.0556864
1549	60	0	Loma Larga Este	1.01119	0.984991	1.01019	0.953529	0.807616	0.922607	1.05072	0.813483	0.861155	1.05093	0.946642	0.953504	0.939779	-0.0556864
1550	115	0	Loma Larga Este	1.01119	0.984991	1.01019	0.953529	0.807616	0.922607	1.05072	0.813483	0.861155	1.05093	0.946642	0.953504	0.939779	-0.0556864
1551	125	0	Loma Larga Este	1.01119	0.984991	1.01019	0.953529	0.807616	0.922607	1.05072	0.813483	0.861155	1.05093	0.946642	0.953504	0.939779	-0.0556864
1552	110	0	Loma Larga Este	1.01119	0.984991	1.01019	0.953529	0.807616	0.922607	1.05072	0.813483	0.861155	1.05093	0.946642	0.953504	0.939779	-0.0556864
1553	110	0	Loma Larga Este	1.01119	0.984991	1.01019	0.953529	0.807616	0.922607	1.05072	0.813483	0.861155	1.05093	0.946642	0.953504	0.939779	-0.0556864
1554	120	0	Loma Larga Este	1.01119	0.984991	1.01019	0.953529	0.807616	0.922607	1.05072	0.813483	0.861155	1.05093	0.946642	0.953504	0.939779	-0.0556864
1555	55	0	Loma Larga Este	1.01119	0.984991	1.01019	0.953529	0.807616	0.922607	1.05072	0.813483	0.861155	1.05093	0.946642	0.953504	0.939779	-0.0556864
1556	100	0	Loma Larga Este	1.01119	0.984991	1.01019	0.953529	0.807616	0.922607	1.05072	0.813483	0.861155	1.05093	0.946642	0.953504	0.939779	-0.0556864
1557	120	0	Loma Larga Este	1.01119	0.984991	1.01019	0.953529	0.807616	0.922607	1.05072	0.813483	0.861155	1.05093	0.946642	0.953504	0.939779	-0.0556864
1558	100	0	Loma Larga Este	1.01119	0.984991	1.01019	0.953529	0.807616	0.922607	1.05072	0.813483	0.861155	1.05093	0.946642	0.953504	0.939779	-0.0556864
1559	45	0	Loma Larga Este	1.01119	0.984991	1.01019	0.953529	0.807616	0.922607	1.05072	0.813483	0.861155	1.05093	0.946642	0.953504	0.939779	-0.0556864
1560	45	0	Loma Larga Este	1.01119	0.984991	1.01019	0.953529	0.807616	0.922607	1.05072	0.813483	0.861155	1.05093	0.946642	0.953504	0.939779	-0.0556864
1561	20	0	Loma Larga Este	1.01119	0.984991	1.01019	0.953529	0.807616	0.922607	1.05072	0.813483	0.861155	1.05093	0.946642	0.953504	0.939779	-0.0556864
1562	80	0	Loma Larga Este	1.01119	0.984991	1.01019	0.953529	0.807616	0.922607	1.05072	0.813483	0.861155	1.05093	0.946642	0.953504	0.939779	-0.0556864
1563	40	0	Loma Larga Este	1.01119	0.984991	1.01019	0.953529	0.807616	0.922607	1.05072	0.813483	0.861155	1.05093	0.946642	0.953504	0.939779	-0.0556864
1564	60	0	Loma Larga Este	1.01119	0.984991	1.01019	0.953529	0.807616	0.922607	1.05072	0.813483	0.861155	1.05093	0.946642	0.953504	0.939779	-0.0556864
1565	130	0	Loma Larga Este	1.01119	0.984991	1.01019	0.953529	0.807616	0.922607	1.05072	0.813483	0.861155	1.05093	0.946642	0.953504	0.939779	-0.0556864
1566	80	0	Loma Larga Este	1.01119	0.984991	1.01019	0.953529	0.807616	0.922607	1.05072	0.813483	0.861155	1.05093	0.946642	0.953504	0.939779	-0.0556864
1567	40	0	Loma Larga Este	1.01119	0.984991	1.01019	0.953529	0.807616	0.922607	1.05072	0.813483	0.861155	1.05093	0.946642	0.953504	0.939779	-0.0556864
1568	35	0	Loma Larga Este	1.01119	0.984991	1.01019	0.953529	0.807616	0.922607	1.05072	0.813483	0.861155	1.05093	0.946642	0.953504	0.939779	-0.0556864
1569	30	0	Loma Larga Este	1.01119	0.984991	1.01019	0.953529	0.807616	0.922607	1.05072	0.813483	0.861155	1.05093	0.946642	0.953504	0.939779	-0.0556864
1570	20	0	Loma Larga Este	1.01119	0.984991	1.01019	0.953529	0.807616	0.922607	1.05072	0.813483	0.861155	1.05093	0.946642	0.953504	0.939779	-0.0556864
1571	45	0	Loma Larga Este	1.01119	0.984991	1.01019	0.953529	0.807616	0.922607	1.05072	0.813483	0.861155	1.05093	0.946642	0.953504	0.939779	-0.0556864
1572	30	0	Loma Larga Este	1.01119	0.984991	1.01019	0.953529	0.807616	0.922607	1.05072	0.813483	0.861155	1.05093	0.946642	0.953504	0.939779	-0.0556864
1573	35	0	Loma Larga Este	1.01119	0.984991	1.01019	0.953529	0.807616	0.922607	1.05072	0.813483	0.861155	1.05093	0.946642	0.953504	0.939779	-0.0556864
1574	40	0	Loma Larga Este	1.01119	0.984991	1.01019	0.953529	0.807616	0.922607	1.05072	0.813483	0.861155	1.05093	0.946642	0.953504	0.939779	-0.0556864
1575	30	0	Loma Larga Este	1.01119	0.984991	1.01019	0.953529	0.807616	0.922607	1.05072	0.813483	0.861155	1.05093	0.946642	0.953504	0.939779	-0.0556864
1576	15	0	Loma Larga Este	1.01119	0.984991	1.01019	0.953529	0.807616	0.922607	1.05072	0.813483	0.861155	1.05093	0.946642	0.953504	0.939779	-0.0556864
1577	110	0	Loma Larga Este	1.01119	0.984991	1.01019	0.953529	0.807616	0.922607	1.05072	0.813483	0.861155	1.05093	0.946642	0.953504	0.939779	-0.0556864
1578	25	0	Loma Larga Este	1.01119	0.984991	1.01019	0.953529	0.807616	0.922607	1.05072	0.813483	0.861155	1.05093	0.946642	0.953504	0.939779	-0.0556864
1579	70	1	Loma Larga Este	1.01119	0.984991	1.01019	0.953529	0.807616	0.922607	1.05072	0.813483	0.861155	1.05093	0.946642	0.953504	0.939779	-0.0556864
1580	70	1	Loma Larga Este	1.01119	0.984991	1.01019	0.953529	0.807616	0.922607	1.05072	0.813483	0.861155	1.05093	0.946642	0.953504	0.939779	-0.0556864
1581	60	0	Loma Larga Este	1.01119	0.984991	1.01019	0.953529	0.807616	0.922607	1.05072	0.813483	0.861155	1.05093	0.946642	0.953504	0.939779	-0.0556864
1582	70	0	Loma Larga Este	1.01119	0.984991	1.01019	0.953529	0.807616	0.922607	1.05072	0.813483	0.861155	1.05093	0.946642	0.953504	0.939779	-0.0556864
1583	30	0	Loma Larga Este	1.01119	0.984991	1.01019	0.953529	0.807616	0.922607	1.05072	0.813483	0.861155	1.05093	0.946642	0.953504	0.939779	-0.0556864
1584	30	0	Loma Larga Este	1.01119	0.984991	1.01019	0.953529	0.807616	0.922607	1.05072	0.813483	0.861155	1.05093	0.946642	0.953504	0.939779	-0.0556864
1585	35	1	Loma Larga Este	1.01119	0.984991	1.01019	0.953529	0.807616	0.922607	1.05072	0.813483	0.861155	1.05093	0.946642	0.953504	0.939779	-0.0556864
1586	30	0	Loma Larga Este	1.01119	0.984991	1.01019	0.953529	0.807616	0.922607	1.05072	0.813483	0.861155	1.05093	0.946642	0.953504	0.939779	-0.0556864
1587	85	1	Loma Larga Este	1.01119	0.984991	1.01019	0.953529	0.807616	0.922607	1.05072	0.813483	0.861155	1.05093	0.946642	0.953504	0.939779	-0.0556864
1588	30	0	Loma Larga Este	1.01119	0.984991	1.01019	0.953529	0.807616	0.922607	1.05072	0.813483	0.861155	1.05093	0.946642	0.953504	0.939779	-0.0556864
1589	70	0	Loma Larga Este	1.01119	0.984991	1.01019	0.953529	0.807616	0.922607	1.05072	0.813483	0.861155	1.05093	0.946642	0.953504	0.939779	-0.0556864
1590	25	0	Loma Larga Este	1.01119	0.984991	1.01019	0.953529	0.807616	0.922607	1.05072	0.813483	0.861155	1.05093	0.946642	0.953504	0.939779	-0.0556864
1591	50	1	Loma Larga Este	1.01119	0.984991	1.01019	0.953529	0.807616	0.922607	1.05072	0.813483	0.861155	1.05093	0.946642	0.953504	0.939779	-0.0556864
1592	80	0	Loma Larga Este	1.01119	0.984991	1.01019	0.953529	0.807616	0.922607	1.05072	0.813483	0.861155	1.05093	0.946642	0.953504	0.939779	-0.0556864
1593	50	0	Loma Larga Este	1.01119	0.984991	1.01019	0.953529	0.807616	0.922607	1.05072	0.813483	0.861155	1.05093	0.946642	0.953504	0.939779	-0.0556864
1594	30	0	Loma Larga Este	1.01119	0.984991	1.01019	0.953529	0.807616	0.922607	1.05072	0.813483	0.861155	1.05093	0.946642	0.953504	0.939779	-0.0556864
1595	70	0	Loma Larga Este	1.01119	0.984991	1.01019	0.953529	0.807616	0.922607	1.05072	0.813483	0.861155	1.05093	0.946642	0.953504	0.939779	-0.0556864
1596	85	0	Loma Larga Este	1.01119	0.984991	1.01019	0.953529	0.807616	0.922607	1.05072	0.813483	0.861155	1.05093	0.946642	0.953504	0.939779	-0.0556864
1597	40	0	Loma Larga Este	1.01119	0.984991	1.01019	0.953529	0.807616	0.922607	1.05072	0.813483	0.861155	1.05093	0.946642	0.953504	0.939779	-0.0556864
1598	35	0	Loma Larga Este	1.01119	0.984991	1.01019	0.953529	0.807616	0.922607	1.05072	0.813483	0.861155	1.05093	0.946642	0.953504	0.939779	-0.0556864
1599	40	0	Loma Larga Este	1.01119	0.984991	1.01019	0.953529	0.807616	0.922607	1.05072	0.813483	0.861155	1.05093	0.946642	0.953504	0.939779	-0.0556864
1600	35	0	Loma Larga Este	1.01119	0.984991	1.01019	0.953529	0.807616	0.922607	1.05072	0.813483	0.861155	1.05093	0.946642	0.953504	0.939779	-0.0556864
1601	40	0	Loma Larga Este	1.01119	0.984991	1.01019	0.953529	0.807616	0.922607	1.05072	0.813483	0.861155	1.05093	0.946642	0.953504	0.939779	-0.0556864
1602	95	0	Loma Larga Este	1.01119	0.984991	1.01019	0.953529	0.807616	0.922607	1.05072	0.813483	0.861155	1.05093	0.946642	0.953504	0.939779	-0.0556864
1603	70	0	Loma Larga Este	1.01119	0.984991	1.01019	0.953529	0.807616	0.922607	1.05072	0.813483	0.861155	1.05093	0.946642	0.953504	0.939779	-0.0556864
1604	25	0	Loma Larga Este	1.01119	0.984991	1.01019	0.953529	0.807616	0.922607	1.05072	0.813483	0.861155	1.05093	0.946642	0.953504	0.939779	-0.0556864
1605	20	0	Loma Larga Este	1.01119	0.984991	1.01019	0.953529	0.807616	0.922607	1.05072	0.813483	0.861155	1.05093	0.946642	0.953504	0.939779	-0.0556864
1606	15	0	Loma Larga Este	1.01119	0.984991	1.01019	0.953529	0.807616	0.922607	1.05072	0.813483	0.861155	1.05093	0.946642	0.953504	0.939779	-0.0556864
1607	15	0	Loma Larga Este	1.01119	0.984991	1.01019	0.953529	0.807616	0.922607	1.05072	0.813483	0.861155	1.05093	0.946642	0.953504	0.939779	-0.0556864
1608	45	0	Loma Larga Este	1.01119	0.984991	1.01019	0.953529	0.807616	0.922607	1.05072	0.813483	0.861155	1.05093	0.946642	0.953504	0.939779	-0.0556864
1609	20	0	Loma Larga Este	1.01119	0.984991	1.01019	0.953529	0.807616	0.922607	1.05072	0.813483	0.861155	1.05093	0.946642	0.953504	0.939779	-0.0556864
1610	30	0	Loma Larga Este	1.01119	0.984991	1.01019	0.953529	0.807616	0.922607	1.05072	0.813483	0.861155	1.05093	0.946642	0.953504	0.939779	-0.0556864
1611	70	0	Loma Larga Este	1.01119	0.984991	1.01019	0.953529	0.807616	0.922607	1.05072	0.813483	0.861155	1.05093	0.946642	0.953504	0.939779	-0.0556864
1612	85	0	Loma Larga Este	1.01119	0.984991	1.01019	0.953529	0.807616	0.922607	1.05072	0.813483	0.861155	1.05093	0.946642	0.953504	0.939779	-0.0556864
1613	40	1	Loma Larga Este	1.01119	0.984991	1.01019	0.953529	0.807616	0.922607	1.05072	0.813483	0.861155	1.05093	0.946642	0.953504	0.939779	-0.0556864
1614	30	0	Loma Larga Este	1.01119	0.984991	1.01019	0.953529	0.807616	0.922607	1.05072	0.813483	0.861155	1.05093	0.946642	0.953504	0.939779	-0.0556864
1615	45	0	Loma Larga Este	1.01119	0.984991	1.01019	0.953529	0.807616	0.922607	1.05072	0.813483	0.861155	1.05093	0.946642	0.953504	0.939779	-0.0556864

## Sheet: Table_S4
Table S4: Statistical data from models of relationships between population parameters and the index of climate change vulnerability applied to the present scenario in A moorei.
Variable Y	Variable X	Type of regresion	Statistic	p-value	R-squared	df	Number of data
Mean stem length (cm)	Mean CCVI Current climate	Linear model	F = 0.72	0.413	0.06163	11	13
Proportion of young plants (%)	Mean CCVI Current climate	Binomial model	Z = 0.23	0.8206	0.004878	11	13
Variable Y	Variable X	Type of regresion	Statistic	p-value	R-squared	df	Number of data	Slope of the model	Confidence intervals for slope of the model
Stem length (cm) [Fruiting plants]	Mean CCVI Current climate	Robust linear model	F = 37.57	< 0.001	0.08612	420	422	-13.552	-17.7699	-9.33382
Stem length (cm) [Fruiting plants]	Mean CCVI 2055	Robust linear model	F = 23.14	< 0.001	0.05691	420	422	-196.74	-289.473	-104.012
Stem length (cm) [Fruiting plants]	Mean CCVI 2055 SSP5-RCP8.5	Robust linear model	F = 44.69	< 0.001	0.1051	420	422	-182.9	-247.53	-118.261
* McFadden's R-squared as an approximation for binomial models.
